# Supplementary material for: ‘It feels like being trapped in an abusive relationship’: bullying prevalence and consequences in the New Zealand senior medical workforce: a cross-sectional study
Source: PubMed Central journal article supplement — BMJ Open. 2018 Mar 19;8(3):e020158. doi: 10.1136/bmjopen-2017-020158 (PMC5875598; doi:10.1136/bmjopen-2017-020158), 2018-03-19
Supplement: bmjopen-2017-020158.draft_revisions.pdf [file bmjopen-2017-020158.draft_revisions.pdf]

# BMJ Open

BMJ Open is committed to open peer review. As part of this commitment we make the peer review history of every article we publish publicly available.

When an article is published we post the peer reviewers' comments and the authors' responses online. We also post the versions of the paper that were used during peer review. These are the versions that the peer review comments apply to.

The versions of the paper that follow are the versions that were submitted during the peer review process. They are not the versions of record or the final published versions. They should not be cited or distributed as the published version of this manuscript.

BMJ Open is an open access journal and the full, final, typeset and author-corrected version of record of the manuscript is available on our site with no access controls, subscription charges or pay-per-view fees (<http://bmjopen.bmj.com>).

If you have any questions on BMJ Open's open peer review process please email [editorial.bmjopen@bmj.com](mailto:editorial.bmjopen@bmj.com)

# BMJ Open

**“It feels like being trapped in an abusive relationship”:  
bullying prevalence and consequences in the New Zealand  
senior medical workforce, a cross-sectional study**

|                                 |                                                                                                                                                                                                                                                                 |
|---------------------------------|-----------------------------------------------------------------------------------------------------------------------------------------------------------------------------------------------------------------------------------------------------------------|
| Journal:                        | <i>BMJ Open</i>                                                                                                                                                                                                                                                 |
| Manuscript ID                   | bmjopen-2017-020158                                                                                                                                                                                                                                             |
| Article Type:                   | Research                                                                                                                                                                                                                                                        |
| Date Submitted by the Author:   | 17-Oct-2017                                                                                                                                                                                                                                                     |
| Complete List of Authors:       | Chambers, Charlotte; The Association of Salaried Medical Specialists, Frampton, Chris; University of Otago Christchurch<br>McKee, Martin; London School of Hygiene and Tropical Medicine<br>Barclay, Murray; University of Otago Christchurch, Gastroenterology |
| <b>Primary Subject Heading</b>: | Medical management                                                                                                                                                                                                                                              |
| Secondary Subject Heading:      | Qualitative research                                                                                                                                                                                                                                            |
| Keywords:                       | Bullying, Medical specialists, New Zealand                                                                                                                                                                                                                      |
|                                 |                                                                                                                                                                                                                                                                 |

SCHOLARONE™  
Manuscripts

Only

1  
2  
3  
4 **Title:** "It feels like being trapped in an abusive relationship": bullying prevalence and  
5 consequences in the New Zealand senior medical workforce; a cross-sectional study  
6

7 **Corresponding author:** Charlotte N. L. Chambers, Ph.D., MSc  
8 Principal Analyst, Association of Salaried Medical Specialists  
9 PO Box 10763, Wellington, 6143, New Zealand  
10  
11 Email: [CC@asms.nz](mailto:CC@asms.nz)  
12  
13 Phone: 0064 4 499 1271  
14  
15 Fax: 0064 4 499 4500

16 **Co-authors:** Christopher M.A. Frampton, Ph.D., BSc,  
17 Professor, University of Otago, Christchurch, New Zealand

18  
19  
20 Martin McKee, CBE MD DSc FMedSci  
21 Professor, London School of Hygiene and Tropical Medicine, London, United Kingdom

22  
23  
24 Murray Barclay, MD, FRACP, AGAF  
25 Clinical Professor, University of Otago, Christchurch, New Zealand

26  
27  
28 Word Count: 4271 words

29 Number of Figures: 2

30 Number of tables: 5

31 Number of references: 37

32 Number of supplementary files: 3  
33

34  
35  
36 Funding statement: This research received no specific grant from any funding agency in the  
37 public, commercial or not-for-profit sectors

38  
39 Competing interest statement: No competing interests declared  
40  
41  
42  
43  
44  
45  
46  
47  
48  
49  
50  
51  
52  
53  
54  
55  
56  
57  
58  
59  
60

## ABSTRACT

**Objectives:** To estimate prevalence of and factors contributing to bullying amongst senior doctors and dentists in New Zealand's public health system, to ascertain rates of reporting bullying behaviour, perceived barriers to reporting and the effects of bullying professionally and personally.

**Design:** Cross-sectional, mixed methods study.

**Setting:** New Zealand.

**Participants:** 1759 of 4307 members of the Association of Salaried Medical Specialists (40.8% response rate).

**Main outcome measures:** Prevalence of bullying was measured using the Negative Acts Questionnaire (revised) (NAQ-r). Workplace demands and level of peer and managerial support were measured with the Health and Safety Executive (HSE) Management Standards Analysis tool. Categories of perpetrators for self-reported and witnessed bullying and barriers to reporting bullying were obtained and qualitative data detailing the consequence of bullying were analysed thematically.

**Results:** The overall prevalence of bullying, measured by the NAQ-r, was 38% (at least 1 negative act on a weekly or daily basis), 37.2% self-reported and 67.5% witnessed. There were significant differences in rates of bullying by specialty ( $p=0.001$ ) with emergency medicine reporting the highest bullying prevalence (47.9%). The most commonly cited perpetrators were other senior medical or dental specialists. 69.6% declined to report their bullying. Bullying across all measures was significantly associated with increasing work demands and lower peer and managerial support ( $p=0.001$ ). Consequences of bullying were wide ranging, affecting workplace environments, personal well-being and subjective quality of patient care.

**Conclusions:** Bullying is prevalent in New Zealand's senior medical workforce and is associated with high workloads and low peer and managerial support. These findings help identify conditions and pressures that may encourage bullying and highlight the significant risk of bullying for individuals and their patients.

## ARTICLE SUMMARY

### Strengths and limitations of the study:

- This is the first study to report prevalence of bullying through an analysis of the NAQ-r in a multi-specialty nationwide survey of medical specialists in any country.
- It contributes to the scant literature on senior medical professionals as victims of bullying.
- The strong association between bullying, increasing work demands and low peer and managerial support extends the understanding of bullying as a multicausal phenomenon as well as suggesting opportunities for mitigation.
- The limitations of this study include a moderate participation rate, self-reported data and the cross-sectional design with its limitations for causal inference.

## INTRODUCTION

Workplace bullying in medicine is a cause of on-going concern in several countries. Described as the most 'destructive phenomenon plaguing medical culture'[1] it poses significant risks to patient safety and quality of patient care[2], staff morale and job satisfaction[3] and the physical and psychological wellbeing of doctors and their co-workers[4,5].

Workplace bullying is defined as an escalating process where individuals repeatedly and over a period of time experience negative actions and behaviours from the people they encounter at work[6,7]. Bullying behaviours may range from overt aggression and violence to subtle and indirect acts. The intent of the behaviour(s) is not the primary consideration; it is the impact on and perception of the victim that is key in determining whether or not bullying has occurred[8,9].

The antecedents of workplace bullying are many and complex. The high rates of bullying experienced by junior doctors and trainees, for example, have been ascribed to the hierarchical model of medical training with bullying described as a necessary but unpleasant 'rite of passage'[1,10]. Factors known to encourage bullying include stressful and demanding work environments[11] competitive and unsupportive workplace cultures [8] and normalisation of incivility and rudeness in common conduct[12].

Research commissioned by the Royal Australasian College of Surgeons (RACS) in 2015 found almost half of all surgeons in New Zealand and Australia had experienced some form of inappropriate behaviour, with trainees reporting the highest reported levels of bullying amongst those surveyed[13]. Surgical directors or consultants were found to be the main perpetrators. Much less is known about the prevalence and consequences of bullying experienced by consultants and specialists in other specialities. In the New Zealand context, specialists are defined as any medical practitioner who is vocationally registered by the Medical Council of New Zealand in an approved branch of medicine. Of the known studies that have focussed on senior doctors, the focus has been on bullying prevalence in specific medical specialties for example, Australian general surgery consultants[14], Australasian fellows of the college of intensive care medicine[15] or obstetrics and gynaecology consultants working in the British National Health Service (NHS)[16].

To the best of the authors' knowledge, no studies to date have specifically assessed the prevalence of bullying in medical specialists in a multispecialty, multicentre nationwide survey. This study addresses this knowledge gap by investigating the prevalence of bullying amongst senior doctors and dentists of different specialties working in New Zealand's public health system. The study also explores correlates of experiencing negative behaviours, including medical specialty, gender and ethnicity as well as perceived levels of workplace demands and support from peers and non-clinical managers. Finally, the study examines the nature and extent of barriers to formally reporting bullying behaviour as well as the consequences of bullying on the professional and personal lives of respondents.

## METHODS

### Participants

Participants were members of the Association of Salaried Medical Specialists (ASMS) who are medical and dental specialists, and other non-specialist registered medical officers, employed by New Zealand's 20 District Health Boards (DHBs) and other medical employers around the country such as the national blood service and community health providers. DHBs provide inpatient and outpatient healthcare for geographically defined populations within New Zealand's health system and are the main employers of health professionals working in the public sector. The ASMS is the professional association and union for senior doctors and dentists in New Zealand. For ease of description, these ASMS members are referred to as medical specialists or as the senior medical workforce. At the time of the survey the ASMS represented over 90% of all senior doctors and dentists and other non-vocationally registered medical specialists employed within New Zealand's DHBs and approximately 77% of non-DHB employers.

The entire ASMS membership (4307 individuals) was invited by email to participate voluntarily in an anonymous electronic survey in June 2017. The survey was open for 1-month and 4 reminders were sent out to encourage participation. Demographic information, including age, gender, main place of work, ethnicity, and country of primary medical qualification, was requested, summarised and described.

### Measures

Prevalence of workplace bullying was measured with the negative acts questionnaire (revised) (NAQ-r), developed by Einarsen, et al. [17]. The NAQ-r is accepted as a robust tool to quantify bullying in international contexts as it combines both an operational approach to establishing bullying prevalence as well as a single item measure of perceived victimisation[18]. The first part of the NAQ-r scores how often respondents have experienced 22 types of behaviours over the past 6 months (never=1, now and then=2, monthly=3, weekly=4, daily=5). Overall scores were computed with a possible range of 22 (never experienced any behaviours) to 110 (experiencing all behaviours on a daily basis). The NAQ-r comprises three interrelated subscales of bullying; work-related, person-related and physically intimidating bullying, which enables an analysis of the prevalence of the different types of negative behaviours.

After the NAQ-r questions had been answered, a definition of workplace bullying was provided: *'bullying at work refers to situations where one or more persons feel subjected to negative and/or aggressive behaviour from others in the workplace over a period of time and in a situation where they for different reasons are unable to defend themselves against these actions'*[adapted from 19]. On the basis of this definition, respondents were asked whether they had witnessed bullying of other staff or colleagues and whether they had been subjected to bullying over the past 6 months. Responses were on a 5-point Likert scale (never; yes, rarely; yes, now and then; yes, several times per week; and yes, almost daily).

Bullying prevalence from the NAQ-r was established according to Leymann's criteria as experiencing at least one negative act on a daily or weekly basis over a 6 month period[20]. For both witnessed and self-report responses, bullying was identified if any of the affirmative responses, i.e., very rarely, now and then, several times a week and almost daily, were endorsed.

1  
2  
3  
4 Those respondents who reported either witnessing or self-reporting bullying were asked to select  
5 the main categories of perpetrators of the bullying and those who self-reported were asked whether  
6 they had reported the behaviours, what the outcomes of reporting were and if they had not  
7 reported them, the main reasons why.  
8  
9

10 Levels of workplace demand (including factors such as workload and the work environment) and  
11 support from colleagues and non-clinical managers were measured using 17 items from the Health  
12 and Safety Executive Management standards analysis tool[21] asking about experiences at work  
13 over the past six months (never=1 to always =5 and work demands never = 5 to always = 1). Total  
14 scores for each of these three subscales were calculated and the scores for workplace demands  
15 reversed, so that higher scores reflected higher demands.  
16  
17

18 A chi-square goodness of fit test was used to compare the mixture of gender and DHB groups in the  
19 respondent group with the known distributions for the full ASMS. Differences in mean scores for the  
20 individual questions in the NAQ-r and the health and safety executive management scales between  
21 demographic, specialty and country of training (NZ v IMG) groups were tested using 1-way Analysis  
22 of variance (ANOVA). The differences in the percentages experiencing the different types of bullying  
23 were compared amongst the groups using chi-square tests. Spearman's correlation coefficients  
24 were used to test the associations between HSE scales and the NAQ-r scales and the frequency of  
25 witnessed and respondent's self-reporting of being bullied. ANOVA was used to test construct  
26 validity between those scoring as a victim of bullying using self-report data and those with higher  
27 total sum scores on the NAQ-r. A two-tailed p-value <0.05 was used to define statistical significance.  
28  
29  
30  
31

32 Qualitative data were extracted from comments from respondents who self-identified as bullied.  
33 These respondents were asked to describe the impact of bullying on their personal and professional  
34 lives. Data from the comments section were imported into NVivo pro (V.11), read through in detail  
35 and open coded. This coding resulted in 23 recurring themes that were grouped into 3 umbrella  
36 categories pertaining to the severity of the consequences of the bullying behaviour, namely  
37 significantly, moderately and little effects/managing, consistent with a study by Shabazz, et al. [16].  
38 This process followed the broad tenets of grounded theory where qualitative data is organised into  
39 emergent themes through iterative coding with the resultant themes understood to reflect the  
40 perspectives of the research participants[22]. Comments selected for inclusion were those that best  
41 expressed the various themes. Comments were transcribed directly, and where sections were  
42 omitted, ellipses ('...') signify the break. Any words replaced or altered to preserve anonymity, tense  
43 or sense are noted within square brackets ('[ ]').  
44  
45  
46  
47  
48  
49  
50  
51  
52  
53  
54  
55  
56  
57  
58  
59  
60

## RESULTS

Responses were received from 40.8% (n=1759) of the ASMS membership. 56.8% (n=862) were male and 43.2% (n=655) female. 242 respondents did not disclose their gender and occasionally other items were not completed. The majority of respondents were New Zealand trained (58.1%) and identified as New Zealand European (Pākehā) (59.4%). 59 specialty and sub-specialties were represented in the study which were grouped into 26 major specialty categories for analyses (see Appendix 1). Some comments left in open text boxes expressed fear of identification and this was also raised in 4 emails. Analysis was undertaken on the most complete data available for each summary or comparison and the actual numbers available are specified throughout. A full demographic summary of respondents is provided in Table 1.

The chi-square goodness of fit tests indicated a slight overrepresentation of females in the sample, (43% compared with 38% in the ASMS) and the overrepresentation of a single DHB in the sample (6% compared with 4%). Apart from these two examples, the respondents were generally representative of the full ASMS membership.



**Table 1: Demographic composition of survey respondents**

| <b>Gender</b>                                                     | <b>N</b> | <b>%</b> |
|-------------------------------------------------------------------|----------|----------|
| Females                                                           | 862      | 56.8     |
| Males                                                             | 655      | 43.2     |
| <i>Not disclosed</i>                                              | 242      |          |
| <b>Age bracket</b>                                                | <b>n</b> | <b>%</b> |
| 30-39                                                             | 182      | 11.6     |
| 40-49                                                             | 577      | 36.8     |
| 50-59                                                             | 545      | 34.8     |
| 60-69                                                             | 235      | 15.0     |
| 70 and over                                                       | 29       | 1.8      |
| <i>Not disclosed</i>                                              | 191      |          |
| <b>Ethnicity categories</b>                                       | <b>n</b> | <b>%</b> |
| NZ European/Pākehā                                                | 919      | 59.4     |
| Māori/Pasifika (Samoan, Cook Island Māori, Tongan, Fijian)        | 31       | 2.0      |
| Asian/Indian (Southeast Asian, Chinese, Indian, Other Asian)      | 165      | 10.7     |
| European/other European                                           | 315      | 20.4     |
| Other (Middle Eastern, Latin American/Hispanic, African, 'other') | 117      | 7.6      |
| <i>Not disclosed</i>                                              | 212      |          |
| <b>Country of primary medical qualification</b>                   | <b>n</b> | <b>%</b> |
| New Zealand                                                       | 888      | 58.1     |
| International medical graduate                                    | 638      | 41.9     |
| <i>Not disclosed</i>                                              | 230      |          |
| <b>Medical specialty</b>                                          | <b>n</b> | <b>%</b> |
| Anaesthesia                                                       | 199      | 14.3     |
| Cardiology                                                        | 30       | 2.1      |
| Dentistry                                                         | 31       | 2.2      |
| Emergency medicine                                                | 94       | 6.7      |
| General medicine                                                  | 73       | 5.2      |
| General practice                                                  | 35       | 2.5      |
| General surgery                                                   | 48       | 3.4      |
| Geriatric medicine                                                | 38       | 2.7      |
| Intensive care medicine                                           | 31       | 2.2      |
| Nephrology                                                        | 18       | 1.3      |
| Obstetrics/Gynaecology                                            | 56       | 4.0      |
| Occupational and public health medicine                           | 18       | 1.3      |
| Oncology                                                          | 28       | 2.0      |
| Ophthalmology                                                     | 27       | 1.9      |
| Orthopaedic surgery                                               | 48       | 3.4      |
| Other                                                             | 30       | 2.1      |
| Otolaryngology                                                    | 21       | 1.5      |
| Paediatrics                                                       | 113      | 8.1      |
| Palliative medicine                                               | 24       | 1.7      |
| Pathology                                                         | 29       | 2.1      |
| Psychiatry                                                        | 178      | 12.8     |
| Radiology                                                         | 75       | 5.4      |
| Respiratory medicine                                              | 19       | 1.4      |
| Rural hospital medicine                                           | 18       | 1.3      |
| Specialist internal medicine other                                | 71       | 5.1      |
| Specialist surgery other                                          | 44       | 3.2      |
| <i>Not disclosed</i>                                              | 363      |          |

### Prevalence of negative behaviours

The overall mean NAQ-r score was 31.4, with a maximum score of 102. Based on the NAQ-r, 93% (n=1575) of respondents had experienced at least one negative behaviour at least once over the last 6 months and 38.1% (n=645) had experienced at least one negative behaviour on a daily or weekly basis. 24.9% had experienced two negative behaviours on a weekly or daily basis and 6.7% (n=114) had experienced at least 5 on a daily or weekly basis.

Analysis of the NAQ-r subscales revealed negative work-related behaviours (49.9%) were more prevalent and occurred on a more regular basis than negative person-related (25.3%) or physically intimidating behaviours (16.7%). The most prevalent work-related behaviours experienced on a daily or weekly basis were being exposed to an unmanageable workload (21.2%) and being ordered to do work below your level of competence (14.4%). Being ignored or excluded and having key areas of responsibility removed or replaced with more trivial or unpleasant tasks were the most frequently experienced negative person-related behaviours occurring on a weekly or daily basis (9% and 7.3% respectively). While infrequent, 24 respondents (1.4%) had experienced being shouted at or spontaneous anger on a weekly or daily basis and 11 (0.7%) had experienced threats of violence or actual abuse at the same frequency. Detailed scores for all 22 NAQ-r behaviours are presented in Figure 1.

There was no significant difference in the overall mean NAQ-r score by gender (female mean=32.7, male mean=32.3) although women (mean 3.72) had a significantly higher mean NAQ-r sub-scale score for physically intimidating behaviour than men (mean 3.55),  $p=0.011$ . A higher proportion of female respondents experienced at least one or more negative behaviours than their male counterparts (94.8% vs. 91%,  $p=0.004$ ). Specific questions in the NAQ-r for which women had a higher mean score are noted with # in Figure 1.

There were significant differences in mean scores by age-group ( $p<0.001$ ). Respondents aged 40-49 and 50-59 had higher than average NAQ-r scores and further analysis of frequency scores found respondents aged 40-49 and 50-59 also experienced significantly higher prevalence of bullying behaviours than other age groups. Specific questions in the NAQ-r for which there was significant variance by age group are noted with \* in Figure 1.

Ethnicity was significantly associated with experiencing one or more negative behaviours ( $p=0.037$ ) with Asian ethnicities reporting the lowest prevalence (89.1%) overall. There were no significant associations of ethnicity with overall or sub-scale mean scores but some ethnicities experienced higher levels of some behaviours noted by \$ in Figure 1. International medical graduates (IMGs) reported significantly higher mean scores for person-related bullying than New Zealand trained specialists (16.7 vs. 15.9,  $p=0.012$ ) and reported higher levels of experiencing 5 behaviours (noted with @ in Figure 1) than New Zealand trained specialists.

There were significant differences amongst the medical specialties in the NAQ-r overall mean ( $p=0.032$ ) and subscale scores as well as prevalence of negative behaviours ( $p=0.006$ ). Specialists in emergency medicine and general surgery reported the two highest mean overall NAQ-r scores (35.8 and 35.7 respectively). Respondents from emergency medicine had the highest mean sub-scale scores for work-related and physically intimidating bullying behaviour (14.4 and 4.2 respectively) as

well as the highest prevalence of bullying behaviours experienced on a weekly or daily basis (55.7%). Behaviours with significant effects of medical specialty are noted with ∞ in Figure 1. Prevalence of experiencing at least one negative behaviour (NAQ-r) by medical specialty is summarised in Figure 2.

**Figure 1: Frequency and percentage of respondents experiencing negative behaviours over the past 6 months (NAQ-r)** Sub-scale questions: 1= Work-related bullying 2=person-related bullying 3=physically intimidating bullying.

^ = collapsed frequencies of 'now and then' and monthly

\* behaviours with significant variance by age group

# behaviours with a significantly higher prevalence for female respondents compared to male respondents

\$ behaviours with significant variance by ethnicity

@ behaviours with significantly higher prevalence for IMG respondents compared to NZ-trained respondents

∞behaviours with significant variance by medical specialty

**Figure 2: Prevalence of experiencing at least one negative behaviour (NAQ-r) by medical specialty.**

**Overall prevalence of self-report and witnessed bullying**

37.2% (n=606) self-reported having been bullied 'to some degree' (i.e. from very rarely to almost daily) over the last 6 months. 2.5% (n=40) reported that they had been bullied either several times a week or almost daily. The corresponding figures for witnessing bullying were almost twice as high with 67.5% (n=1109) reporting that they had witnessed colleagues being bullied to some degree (i.e. from very rarely to almost daily) over the last 6 months. 4.7% (n=78) reported that they had witnessed bullying either several times a week or almost daily. Women were significantly more likely to self-report bullying compared with their male counterparts (39.9% vs 32.3%, p=0.002). There were also significant differences in rates of self-report 'to some degree' (p=0.033) and significant differences in frequency of witnessing bullying (p=0.001 'to some degree' and 'weekly or daily') by medical specialty (supplementary figures a and b). There were no other significant differences in rates of self-report or witnessed bullying rates by other demographic variables. Prevalence data for self-report and witnessed bullying is summarised overall and by gender in Table 2.

**Table 2: Prevalence of self-report and witnessed bullying with significant variance by demographic variable**

|                | Self-report as bullied |      |                     |       |                      |     | Witnessed bullying of other staff or colleagues |      |                     |      |                      |     |
|----------------|------------------------|------|---------------------|-------|----------------------|-----|-------------------------------------------------|------|---------------------|------|----------------------|-----|
|                | No                     |      | Yes, to some degree |       | Yes, weekly or daily |     | No                                              |      | Yes, to some degree |      | Yes, weekly or daily |     |
|                | n                      | %    | n                   | %     | n                    | %   | n                                               | %    | n                   | %    | n                    | %   |
| <b>Overall</b> | 1022                   | 62.8 | 606                 | 37.2  | 40                   | 2.5 | 535                                             | 32.5 | 1109                | 67.5 | 78                   | 4.7 |
| Females        | 392                    | 60.1 | 260                 | 39.9* | 17                   | 2.6 | 199                                             | 30.4 | 455                 | 69.6 | 34                   | 5.2 |
| Males          | 583                    | 67.7 | 278                 | 32.3* | 21                   | 2.4 | 299                                             | 34.8 | 561                 | 65.2 | 40                   | 4.7 |

\*p<0.001

Note: totals for each block differ because of missing data

**Associations with bullying, workplace demands, peer and non-clinical manager support**

Non-parametric Spearman's correlations revealed significant associations between the three HSE sub-scales, with levels of workplace demands increasing with decreasing levels of peer and managerial support (all correlations >0.28). There was a strong association between being exposed to higher workplace demands and increasing overall NAQ-r and NAQ-r sub-scale scores. Low levels of peer-support were also strongly associated with higher overall NAQ-r and person-related bullying

scores. Similarly, high levels of workplace demands were associated with higher levels of work-related bullying. Witnessing and self-reporting bullying were also associated with high workplace demands, low levels of peer support and low levels of managerial support as detailed in Table 3.

**Table 3: Correlations between bullying measures and levels of workplace demands, peer and managerial support**

| Correlations<br>(Pearson correlation)            | Level of workplace demands | Level of peer support | Level of non-clinical managers' support |
|--------------------------------------------------|----------------------------|-----------------------|-----------------------------------------|
| NAQ-r score                                      | 0.464**                    | -0.574**              | -0.463**                                |
| Physically intimidating bullying sub-scale score | 0.246**                    | -0.319**              | -0.214**                                |
| Person-related bullying sub-scale score          | 0.284**                    | -0.565**              | -0.408**                                |
| Work-related bullying sub-scale score            | 0.608**                    | -0.491**              | -0.464**                                |
| Frequency of witnessing bullying                 | 0.229**                    | -0.315**              | -0.253**                                |
| Frequency of self-reporting as bullied           | 0.379**                    | -0.461**              | -0.379**                                |

\*\*All correlations are statistically significant at  $p < 0.001$

### Perpetrators and reporting of bullying behaviour

Of the 606 respondents who self-reported as bullied, other senior medical or dental staff were the most commonly cited perpetrators (52.5%) followed by non-clinical managers (31.8%) and clinical leaders (24.9%). The largest share of respondents reported that perpetrators were mainly male (36.8%) followed by those reporting equal numbers of male and female (35.5%).

30.4% ( $n=182$ ) of those who self-reported as bullied formally reported the behaviour experienced. Of the 415 who did not report it, 407 provided reasons why. Table 1 details the most common reasons for not reporting. Notably, 43.5% felt that they would not be supported and 42% felt that reporting would make the situation worse.

**Table 1: Summary of reasons for not reporting bullying behavior**

| Why did you not report this behaviour?*                                           | n   | %    |
|-----------------------------------------------------------------------------------|-----|------|
| I was concerned that reporting the issue would make the situation worse           | 171 | 42.0 |
| I did not know who to report the issue to                                         | 45  | 11.1 |
| I felt I would not be supported if I reported the issue                           | 177 | 43.5 |
| I was concerned about the impact that reporting the issue would have on my career | 112 | 27.5 |
| The behaviour stopped and has not recurred                                        | 26  | 6.4  |
| The person I would normally report the issue to is the perpetrator                | 115 | 28.3 |
| Other (please specify)                                                            | 127 | 31.2 |

\*respondents could select more than one reason

Explanations in the 'other' section expressed choosing not to report due to the behaviours being normalised: *"I have come to accept this as the culture of the institution I feel I cannot trust the people who I could report"*. Others noted that the behaviour was something that they accepted as simply part of the job *"[aggressive] behaviour from upset parents has always been part of my job. It makes me feel shaken and I generally would have a cup of tea with a colleague afterwards. Never considered a formal report"*. Some simply stated that *"I have more important things to worry about"*.

Of the 182 who reported their bullying experience, 30.8% noted that the issue was not addressed and the behaviour continued, while 20.9% stated that the issue was addressed but not resolved and the behaviour continued. 'Other' outcomes (28.6%) included the issue being currently under review as well as people noting either a dismissal of the reporting *"I mentioned to head of department and he said, 'yes they can be difficult sometimes' ""* as well as extreme consequences such as resigning or

1  
2  
3 changing roles “[eventually] I resigned and moved to be as far away from possible from the person.  
4 Restructuring later occurred and that person has now left. The service has been traumatised and is  
5 still healing from his 2 years of reign”.

### 8 **Consequences of bullying on professional and personal lives**

9 The effects of bullying, as reported by those who self-identified as having been bullied (n=563), were  
10 many and varied with ‘moderate’ consequences the most frequently reported. Respondents  
11 described feeling disillusioned, isolated, fearful, and lacking in trust. Others detailed the significant  
12 personal and professional costs of bullying including depressive episodes and feelings of burnout.  
13 Some detailed feelings of distress and upset when their stress and frustration spilled over from work  
14 into their interactions with partners or children. Thirty one comments described bullying as  
15 significantly circumscribing their ability to innovate or improve clinical service delivery due to poor  
16 communication and a tendency to resort to defensive medical practice. Some felt that this  
17 ultimately affected the timeliness and quality of patient care: “[it] makes you reluctant to engage a  
18 second time to discuss patient management. A delay in or wrong decision to discharge is then made.  
19 Over-monitoring by a non-clinical [manager] then has you working defensively. Add abuse from  
20 patients for not meeting expectations and weekly passive aggressive reminders that targets are not  
21 being met...”. A full summary of themes and illustrative comments is detailed in Table 5.  
22  
23  
24  
25  
26  
27  
28  
29  
30  
31  
32  
33  
34  
35  
36  
37  
38  
39  
40  
41  
42  
43  
44  
45  
46  
47  
48  
49  
50  
51  
52  
53  
54  
55  
56  
57  
58  
59  
60

**Table 5: Summary of themes and illustrative comments**

| <b>Themes:</b><br>(NB: comments could reference multiple themes simultaneously)                                                                                                                                                                                                                                                                                                                                                                                                                                                                                                                                                                                                                                                                                                                                                                                                                                                                                                                                               | <b>Illustrative comments:</b>                                                                                                                                                                                                                                                                                                                                                                                                                                                                                                                                                                                                                                                                                                                                                                                                                                                                                                                                                                                                                                                                                                                                                                                                                                                                                                                                                                                                                                                                                                                                                                                                                                                                                                                                                                        |
|-------------------------------------------------------------------------------------------------------------------------------------------------------------------------------------------------------------------------------------------------------------------------------------------------------------------------------------------------------------------------------------------------------------------------------------------------------------------------------------------------------------------------------------------------------------------------------------------------------------------------------------------------------------------------------------------------------------------------------------------------------------------------------------------------------------------------------------------------------------------------------------------------------------------------------------------------------------------------------------------------------------------------------|------------------------------------------------------------------------------------------------------------------------------------------------------------------------------------------------------------------------------------------------------------------------------------------------------------------------------------------------------------------------------------------------------------------------------------------------------------------------------------------------------------------------------------------------------------------------------------------------------------------------------------------------------------------------------------------------------------------------------------------------------------------------------------------------------------------------------------------------------------------------------------------------------------------------------------------------------------------------------------------------------------------------------------------------------------------------------------------------------------------------------------------------------------------------------------------------------------------------------------------------------------------------------------------------------------------------------------------------------------------------------------------------------------------------------------------------------------------------------------------------------------------------------------------------------------------------------------------------------------------------------------------------------------------------------------------------------------------------------------------------------------------------------------------------------|
| <b>Minor consequence/coping</b> <ul style="list-style-type: none"> <li>• Dealt with bully personally (n=3)</li> <li>• Coping by acquiescence, retreat, keeping head down (n=21)</li> <li>• Little effect or no significant impact (n=49)</li> </ul>                                                                                                                                                                                                                                                                                                                                                                                                                                                                                                                                                                                                                                                                                                                                                                           | <p>“Recognise the behaviour and dismiss it and remain calm... Does not affect me and I do not try to defend against allegations made. Have had many years of practice.”</p>                                                                                                                                                                                                                                                                                                                                                                                                                                                                                                                                                                                                                                                                                                                                                                                                                                                                                                                                                                                                                                                                                                                                                                                                                                                                                                                                                                                                                                                                                                                                                                                                                          |
| <b>Moderate consequences:</b> <ul style="list-style-type: none"> <li>• Defamation, character attacks, unfounded gossip or rumours (n=12)</li> <li>• Not wanting to go to work (n=20)</li> <li>• Undermining of abilities or professional standing (n=20)</li> <li>• Feeling unappreciated and/or unacknowledged (n=20)</li> <li>• Affected sleep (n=26)</li> <li>• Reduced hours and level of involvement (n=28)</li> <li>• Impeded ability to innovate or improve clinically (n=31)</li> <li>• Anger, irritation, frustration (n=42)</li> <li>• Loss of self-confidence and faith in abilities (n=42)</li> <li>• Affected personal life or home dynamic (n=49)</li> <li>• Compromised ability to work or perform to usual standards (n=51)</li> <li>• Negative work dynamic resulted (n=52)</li> <li>• Affected collegiality and willingness to collaborate (n=59)</li> <li>• Anxiety, loss of trust, faith in system, feeling isolated (n=66)</li> <li>• Disillusionment loss of enjoyment or love of job (n=76)</li> </ul> | <p>“For the first time in 19 years working as a doctor, I dislike coming to work. I am anxious and sleep poorly. I am struggling in my personal relationships because I feel like I should be able to cope but don't seem to be able to...I often feel unsafe now at work, and I worry that my experience here will have a negative impact on future positions I apply for. I am considering leaving the field of medicine because of my experience at this particular DHB.”</p> <p>“As the person doesn't speak, communicate or interact with [me] and hasn't for 2.5 years. I am at a loss as to how to fulfil my role...[I'm ] basically guessing what to do. Plus [I] have been undermined and humiliated and disenfranchised and the staff I give clinical guidance to know it. I have lost confidence in myself and in my professional abilities.”</p> <p>“... Bullying wrecks a whole week. It leads to self-doubt and second guessing. It takes a long time to recover from. It is poorly recognised. It is difficult as an SMO to call out on bullying as it is a sign of weakness. Therefore, many of us put up with it especially in a system where we are overworked with unrealistic schedules and no hope of making an improvement.”</p> <p>“You pull back and do the bare minimum to keep a service running. Bringing the behaviour to the attention of managers further up the pecking order has made no difference. Patient health is at risk.”</p> <p>Professionally it has affected my enjoyment of my job and I am considering moving to another DHB as I feel that I am so intimidated at times that I am unable to do my job to the best of my abilities. At times it is intolerable. The behaviour has caused me stress which has spilled over into my personal life too.</p> |
| <b>Significant consequences</b> <ul style="list-style-type: none"> <li>• Taken leave (n=7)</li> <li>• Burnout, mental health issues, depression (n=25)</li> <li>• Significant stress (n=58)</li> <li>• Contemplating leaving, early retirement, quitting medicine (n=64)</li> </ul>                                                                                                                                                                                                                                                                                                                                                                                                                                                                                                                                                                                                                                                                                                                                           | <p>“I fear going to work. I feel as if I am being watched the whole time. I feel as though it doesn't matter how good my clinical work is, that my manager and [clinical director] will find a way to put a negative spin on it... I have lost confidence in myself as a doctor and a person. I feel disempowered... I am very anxious about work. This affects my sleep, which makes me worry more... I find it harder to trust people in general, and am more defensive...I am less patient with my children, as I feel so stressed. It feels like being trapped in an abusive relationship... I often dream of leaving. I often feel I have wasted my life, investing so much of myself in my work, when it is not valued by my seniors, even though patients value what I do. ...I see patient care compromised, and the quality of the service being eroded. ...I feel ethically compromised every day”</p>                                                                                                                                                                                                                                                                                                                                                                                                                                                                                                                                                                                                                                                                                                                                                                                                                                                                                     |

## DISCUSSION

This study reports the first multicentre multispecialty study into the prevalence of workplace bullying in a senior medical workforce across an entire country, including the sources of such behaviour and rates of and barriers to reporting. It extends existing research by examining associations between bullying prevalence and perceptions of workload and peer and managerial support. It addresses the extensive methodological debate about how to measure workplace bullying, including both 'inside', or self-report measures and 'outside', or peer report methods[23]. It also combines quantitative and qualitative data, with analysis of the latter, describing personal and professional impacts of bullying, further adding to the strengths of this study. Other approaches, such as focus group discussions, or critical incident analysis would not be feasible on a large scale.

Over a third of this sample of senior doctors and dentists working in New Zealand's public health system are regularly exposed to a wide range of negative behaviours at work. Over a third self-report as being bullied and over two thirds report witnessing bullying of colleagues. The results overall suggest exposure to some degree of negative behaviour is ubiquitous in this senior medical workforce, with work-related bullying especially common.

The strong associations between decreasing peer and managerial support, increasing workplace demands and increasing frequencies of all measures of bullying are of note. These findings contribute to the literature which views bullying as a phenomenon with multiple antecedents, and emphasise the impact of stressful workplaces with poor organisational cultures where bullying may be normalised as a coping strategy[6,9,24]. Conversely, these associations suggest that having good relationships with peers and those in managerial positions might act as a buffer against bullying. It is also worth noting that even in workplaces with high stress and demands, bullying is not always an inevitable consequence[12].

The application of the NAQ-r enables both an assessment of the types of behaviours most commonly experienced as well as the frequency of the bullying experienced in a manner that provides for international comparisons as well as highlighting specific issues requiring action. Overall NAQ-r prevalence in this study is higher than the rates of bullying reported in Australasian studies applying the same methodology [14,25] The NAQ-r mean score and 37% self-report prevalence scores were also higher than in other international studies using the NAQ-r such as Carter, et al. [24]. The difference in the rates of self-reported (37%) and witnessed bullying rates (67.5%) is consistent with trends reported in other studies [3,26]. This differential may be ascribed to a reluctance by individuals to self-identify as a 'victim'[27], but it is equally possible that some respondents may witness the same person being bullied thus potentially overreporting bullying prevalence.

The statistically significant differences in NAQ-r mean scores and self-report bullying rates by age, medical specialty, and for some of the sub-scale scores, gender, ethnicity, medical specialty, and country of medical training, are concerning. They suggest that while bullying is experienced across the board, there are pockets of higher prevalence of certain behaviours for specific groups of individuals that warrant further investigation and organisational action. For example, the finding that international medical graduates are more likely to experience person-related bullying should be of concern given New Zealand's high reliance on IMGs[28]

1  
2  
3 The findings from this study confirm the impression given by the existing literature that certain  
4 medical specialties experience higher prevalence of bullying than others. The high self-report  
5 prevalence (47.9%) and NAQ-r scores for specialists in emergency medicine is, methodological  
6 differences notwithstanding, higher than the 34.5% bullying prevalence reported by the Australasian  
7 College of Emergency Medicine which surveyed all fellows of the college, including trainees[29]. At  
8 the time of both surveys, many emergency departments around the country were reporting higher  
9 than usual demands on their services over the winter period[30]. In light of broader workforce  
10 pressures including poor resourcing, staffing shortages and high levels of burnout in this  
11 workforce[31], it is not hard to conceive that negative interpersonal interactions, particularly if they  
12 are already normalised in the workplace, may escalate as a way to 'get things done' in times of  
13 significant stress[32].  
14  
15

16  
17 Also consistent with studies was the finding that other senior medical staff were the main  
18 perpetrators of self-reported and witnessed bullying behaviour (52.5% overall). These findings  
19 highlight the significant problem of peer-to-peer bullying in this section of the medical workforce.  
20 Little research to date has revealed the extent to which other senior medical and dental staff  
21 bullying each other and this finding is, while not entirely unexpected, of great concern.  
22  
23

24 The low rates of reporting, largely due to the fear of exacerbating the situation or not receiving  
25 support, suggests that considerable effort is still required to facilitate better reporting systems and  
26 procedures for handling bullying complaints. It is of further concern that, for the majority of those  
27 who did formally report bullying behaviour, the issue was not addressed and the behaviour  
28 continued. This suggests that despite the rhetoric, much work remains to be done to improve the  
29 outcomes for those who do choose to report.  
30  
31

32  
33 These findings have considerable relevance for those charged with improving the working conditions  
34 of this vital component of the medical workforce. Previous research has revealed a correlation with  
35 sickness absence, although the direction of causation is unclear[33]. A Finnish study found that those  
36 who experienced bullying were more likely to use sedatives and hypnotics, with potential  
37 consequences for their performance[34]. The same study found greater levels of stress in those who  
38 were the victims of bullying and those who observed it, compared with those in workplaces without  
39 bullying. However, they also have implications for those concerned for the quality of patient  
40 care[35]. As explicated in grim detail in the qualitative data, bullying has far-reaching consequences  
41 that do not stop at the individual. Working in an environment where bullying is both witnessed and  
42 experienced has clear consequences for the manner in which medical teams are able to  
43 function[16,36] and deliver the services upon which public health systems depend[2,37].  
44  
45  
46

47 The results of this survey indicate a need for a comprehensive series of interventions not only to  
48 address problematic behaviours but to consider the broader implications of growing workloads,  
49 under-resourcing and understaffing for the health and wellbeing of this medical workforce and their  
50 patients.  
51  
52

53 It is possible that the topic of the survey may have motivated those who have experienced bullying  
54 to respond, resulting in responder bias. Nevertheless, the primary author received a number of  
55 emails from individuals who self-identified as bullied who chose not to participate in the study for a  
56  
57  
58  
59



1  
2  
3 variety of reasons including fear of identification. Thus, research in this area may contradict the  
4 common conception that responder bias favours those affected by the issue at hand. Regardless,  
5 given the moderate response rate, this study cannot be presumed to be representative of the views  
6 or experiences of the senior medical workforce in New Zealand as a whole. The cross-sectional  
7 design of the survey also means that causal relationships cannot be inferred and any discussion of  
8 the associations between demographic and other factors is not meant to imply causality or direction.  
9

- 10  
11 a. Contributorship statement: The research was designed and conducted by Dr Chambers,  
12 statistical analysis was performed by Prof Frampton and analysis and contributions were  
13 received from Prof Barclay and Prof McKee. All authors edited and revised the final  
14 submission and signed off on the final version.  
15  
16  
17 b. Competing interests: There are no competing interests  
18  
19  
20 c. Funding: There are no funders to report for this submission  
21  
22  
23  
24 d. Data sharing statement: no additional data available  
25  
26  
27 e. Acknowledgements: Thanks to members of the ASMS who participated in this research.  
28

## 29 REFERENCES

- 30 1. Jamieson J, Mitchell R, Le Fevre J, Perry A. Bullying and harassment of trainees: An unspoken  
31 emergency? *Emergency Medicine Australasia* 2015;**27**(5):464-67 doi: 10.1111/1742-  
32 6723.12465.  
33 2. Paice E, Smith D. Bullying of trainee doctors is a patient safety issue. *The Clinical Teacher*  
34 2009;**6**(1):13-17 doi: 10.1111/j.1743-498X.2008.00251.x.  
35 3. Quine L. Workplace bullying in nhs community trust: Staff questionnaire survey. *Bmj*  
36 1999;**318**(7178):228-32.  
37 4. Hogh A, Conway PM, Grynderup MB, et al. Negative acts at work as potential bullying behavior  
38 and depression: Examining the direction of the association in a 2-year follow-up study.  
39 *Journal of occupational and environmental medicine* 2016;**58**(3):e72-9 doi:  
40 10.1097/jom.0000000000000622.  
41 5. Kivimäki M, Virtanen M, Vartia M, Elovainio M, Vahtera J, Keltikangas-Järvinen L. Workplace  
42 bullying and the risk of cardiovascular disease and depression. *Occupational and*  
43 *environmental medicine* 2003;**60**(10):779-83.  
44 6. Einarsen S. Harassment and bullying at work: A review of the scandinavian approach. *Aggression*  
45 *and violent behavior* 2000;**5**(4):379-401.  
46 7. Einarsen S, Raknes BI. Harassment in the workplace and the victimization of men. *Violence and*  
47 *victims* 1997;**12**(3):247.  
48 8. Matthiesen SB, Einarsen S. Bullying in the workplace: Definition, prevalence, antecedents and  
49 consequences. *International Journal of Organization Theory and Behavior* 2010;**13**(2):202.  
50 9. Salin D. Ways of explaining workplace bullying: A review of enabling, motivating and precipitating  
51 structures and processes in the work environment. *Human Relations* 2003;**56**(10):1213-32  
52 doi: 10.1177/00187267035610003.  
53 10. Fink-Samnick E. The new age of bullying and violence in health care: Part 2: Advancing  
54 professional education, practice culture, and advocacy. *Professional case management*  
55 2016;**21**(3):114-26; quiz E1-2 doi: 10.1097/ncm.000000000000146.  
56  
57  
58  
59

11. Hoel H, Salin D. 10 organisational antecedents of workplace bullying. *Bullying and emotional abuse in the workplace* 2003:203.
12. Bradley V, Liddle S, Shaw R, et al. Sticks and stones: Investigating rude, dismissive and aggressive communication between doctors. *Clinical medicine* 2015;**15**(6):541-45.
13. Knowles R, Szoke H, Campbell G, et al. Expert advisory group on discrimination, bullying and sexual harassment advising the royal australasian college of surgeons Report to the Royal Australasian College of Surgeons, 2015.
14. Ling M, Young CJ, Shepherd HL, Mak C, Saw RP. Workplace bullying in surgery. *World J Surg* 2016;**40**(11):2560-66 doi: 10.1007/s00268-016-3642-7.
15. Venkatesh B, Corke C, Raper R, et al. Prevalence of bullying, discrimination and sexual harassment among trainees and fellows of the college of intensive care medicine of australia and new zealand. *Critical care and resuscitation* 2016;**18**(4):230.
16. Shabazz T, Parry-Smith W, Oates S, Henderson S, Mountfield J. Consultants as victims of bullying and undermining: A survey of royal college of obstetricians and gynaecologists consultant experiences. *BMJ Open* 2016;**6**(6) doi: 10.1136/bmjopen-2016-011462.
17. Einarsen S, Hoel H, Notelaers G. Measuring exposure to bullying and harassment at work: Validity, factor structure and psychometric properties of the negative acts questionnaire-revised. *Work & Stress* 2009;**23**(1):24-44.
18. Einarsen S, Hoel H, Notelaers G. *Measuring exposure to bullying and harassment at work: Validity, factor structure and psychometric properties of the negative acts questionnaire-revised*, 2009.
19. Einarsen S, Skogstad A. Bullying at work: Epidemiological findings in public and private organizations. *European Journal of Work and Organizational Psychology* 1996;**5**(2):185-201 doi: 10.1080/13594329608414854.
20. Leymann H. Mobbing and psychological terror at workplaces. *Violence Vict* 1990;**5**(2):119-26.
21. HSE. Health and safety executive management standards tool. Secondary Health and safety executive management standards tool 2017. <http://www.hse.gov.uk/stress/standards/index.htm>.
22. Charmaz K. Grounded theory as an emergent method. In: Hesse-Biber SN, Leavy P, eds. *Handbook of emergent methods*. New York: The Guilford Press, 2008:155-72.
23. Cowie H, Naylor P, Rivers I, Smith PK, Pereira B. Measuring workplace bullying. *Aggression and Violent Behavior* 2002;**7**(1):33-51 doi: [https://doi.org/10.1016/S1359-1789\(00\)00034-3](https://doi.org/10.1016/S1359-1789(00)00034-3).
24. Carter M, Thompson N, Crampton P, et al. Workplace bullying in the uk nhs: A questionnaire and interview study on prevalence, impact and barriers to reporting. *BMJ open* 2013;**3**(6):e002628.
25. Bentley T, Catley B, Cooper-Thomas H, Gardner D, O'Driscoll M, Trenberth L. Understanding stress and bullying in new zealand workplaces: Final report to oh&s steering committee. Wellington, New Zealand 2009.
26. Steadman L, Quine L, Jack K, Felix DH, Waumsley J. Experience of workplace bullying behaviours in postgraduate hospital dentists: Questionnaire survey. *Br Dent J* 2009;**207**(8):379-80 doi: 10.1038/sj.bdj.2009.901.
27. Mikkelsen EG, Einarsen S. Bullying in danish work-life: Prevalence and health correlates. *European Journal of Work and Organizational Psychology* 2001;**10**:393-413 doi: <http://dx.doi.org/10.1080/13594320143000816s>.
28. Zealand MCoN. The new zealand medical workforce in 2013 and 2014. Wellington, New Zealand: Medical Council of New Zealand, 2016.
29. ACEM. Acem membership consultation paper on discrimination, bullying and sexual harassment: Australasian College for Emergency Medicine 2017.
30. Weber A. Winter ills fill hospitals: 'We simply haven't got the space'. *Secondary Winter ills fill hospitals: 'We simply haven't got the space'* 2017.

- 1  
2  
3 [http://www.radionz.co.nz/news/national/335368/winter-ills-fill-hospitals-we-simply-haven-](http://www.radionz.co.nz/news/national/335368/winter-ills-fill-hospitals-we-simply-havent-got-the-space)  
4 [t-got-the-space.](http://www.radionz.co.nz/news/national/335368/winter-ills-fill-hospitals-we-simply-haven-t-got-the-space)  
5 31. Chambers CN, Frampton CM, Barclay M, McKee M. Burnout prevalence in new zealand's public  
6 hospital senior medical workforce: A cross-sectional mixed methods study. *BMJ Open*  
7 2016;**6**(11):e013947 doi: 10.1136/bmjopen-2016-013947.  
8 32. Bentley TA, Catley B, Cooper-Thomas H, et al. Perceptions of workplace bullying in the new  
9 zealand travel industry: Prevalence and management strategies. *Tourism Management*  
10 2012;**33**(2):351-60 doi: <http://dx.doi.org/10.1016/j.tourman.2011.04.004>.  
11 33. Kivimäki M, Elovainio M, Vahtera J. Workplace bullying and sickness absence in hospital staff.  
12 *Occupational and Environmental Medicine* 2000;**57**(10):656-60 doi: 10.1136/oem.57.10.656.  
13 34. Vartia MAL. Consequences of workplace bullying with respect to the well-being of its targets and  
14 the observers of bullying. *Scandinavian Journal of Work, Environment & Health*  
15 2001;**27**(1):63-69.  
16 35. Rosenstein AH, O'Daniel M. Impact and implications of disruptive behavior in the perioperative  
17 arena. *Journal of the American College of Surgeons* 2006;**203**(1):96-105 doi:  
18 <https://doi.org/10.1016/j.jamcollsurg.2006.03.027>.  
19 36. Roche M, Diers D, Duffield C, Catling-Paull C. Violence toward nurses, the work environment, and  
20 patient outcomes. *Journal of Nursing Scholarship* 2010;**42**(1):13-22 doi: 10.1111/j.1547-  
21 5069.2009.01321.x.  
22 37. Wild JRL, Ferguson HJM, McDermott FD, Hornby ST, Gokani VJ. Undermining and bullying in  
23 surgical training: A review and recommendations by the association of surgeons in training.  
24 *International Journal of Surgery*; **23**:S5-S9 doi: 10.1016/j.ijso.2015.09.017.  
25  
26  
27  
28  
29  
30  
31  
32  
33  
34  
35  
36  
37  
38  
39  
40  
41  
42  
43  
44  
45  
46  
47  
48  
49  
50  
51  
52  
53  
54  
55  
56  
57  
58  
59  
60

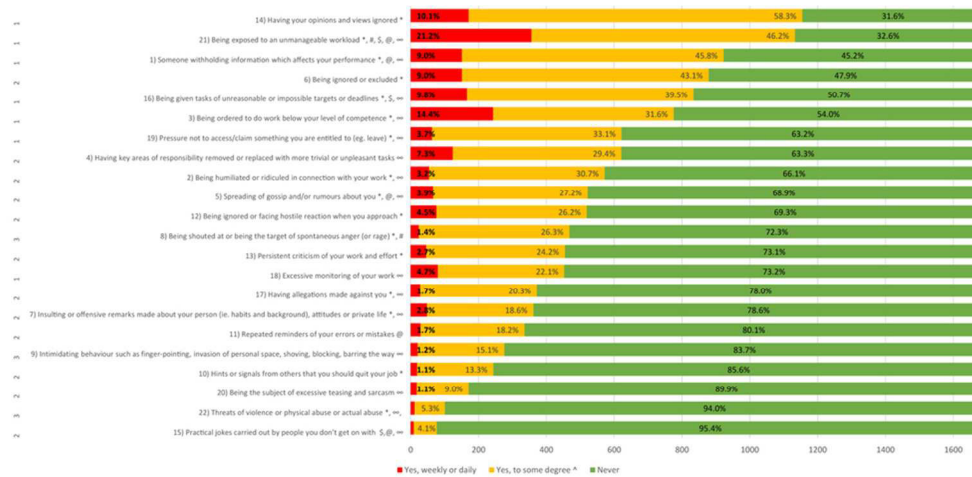

Figure 1: Frequency and percentage of respondents experiencing negative behaviours over the past 6 months (NAQ-r)  
 Sub-scale questions: 1= Work-related bullying 2=person-related bullying 3=physically intimidating bullying.  
 ^ = collapsed frequencies of 'now and then' and monthly  
 \* behaviours with significant variance by age group  
 # behaviours with a significantly higher prevalence for female respondents compared to male respondents  
 \$ behaviours with significant variance by ethnicity  
 @ behaviours with significantly higher prevalence for IMG respondents compared to NZ-trained respondents  
 ∞behaviours with significant variance by medical specialty

85x41mm (300 x 300 DPI)

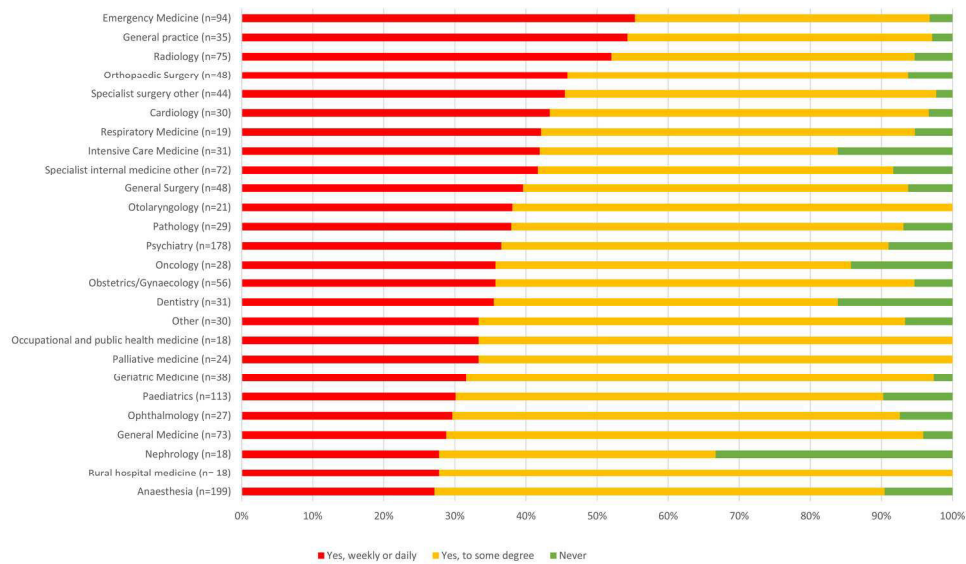

Figure 2: Prevalence of experiencing at least one negative behaviour (NAQ-r) by medical specialty.

103x61mm (600 x 600 DPI)

## Appendix 1

| Grouped specialties:                    | Specialties included:                 | n                         |
|-----------------------------------------|---------------------------------------|---------------------------|
| Psychiatry                              | Addiction medicine                    | 6                         |
|                                         | Psychiatry                            | 162                       |
|                                         | Psychogeriatrics                      | 10                        |
|                                         | Specialist surgery 'other'            |                           |
|                                         | Cardiothoracic surgery                | 5                         |
|                                         | Neurosurgery                          | 4                         |
|                                         | Oral & Maxillofacial Surgery          | 3                         |
|                                         | Paediatric surgery                    | 4                         |
|                                         | Plastic & reconstructive surgery      | 13                        |
|                                         | Vascular surgery                      | 10                        |
|                                         | Urology                               | 5                         |
| Other                                   | Clinical Genetics                     | 3                         |
|                                         | Medical Administration                | 3                         |
|                                         | Other incl. requests for anonymity    | 20                        |
|                                         | Rehabilitation Medicine               | 4                         |
| Specialist internal medicine 'other'    | Dermatology                           | 6                         |
|                                         | Endocrinology                         | 5                         |
|                                         | Gastroenterology                      | 12                        |
|                                         | Haematology                           | 15                        |
|                                         | Immunology                            | 2                         |
|                                         | Infectious Diseases Medicine          | 5                         |
|                                         | Neurology                             | 12                        |
|                                         | Obstetric Medicine                    | 4                         |
|                                         | Rheumatology                          | 11                        |
|                                         | Paediatrics                           | Developmental Paediatrics |
| Neonatology                             |                                       | 10                        |
| Paediatric other                        |                                       | 15                        |
| Paediatric oncology                     |                                       | 6                         |
| Paediatric haematology                  |                                       | 1                         |
| Paediatric cardiology                   |                                       | 3                         |
| Paediatrics                             |                                       | 76                        |
| General practice                        | General Practice                      | 21                        |
|                                         | Family Planning & Reproductive Health | 4                         |
|                                         | Accident & Medical Practice           | 2                         |
|                                         | Sexual Health Medicine                | 8                         |
| Oncology                                | Medical Oncology                      | 18                        |
|                                         | Radiation Oncology                    | 10                        |
| Occupational and public health medicine | Occupational Medicine                 | 3                         |
|                                         | Public Health Medicine                | 15                        |
| Anaesthesia                             | Anaesthesia                           | 191                       |
|                                         | Pain Medicine                         | 8                         |
| Palliative medicine                     | Paediatric palliative care            | 1                         |
|                                         | Palliative Medicine                   | 23                        |

1  
2  
3  
4  
5  
6  
7  
8  
9  
10  
11  
12  
13  
14  
15  
16  
17  
18  
19  
20  
21  
22  
23  
24  
25  
26  
27  
28  
29  
30  
31  
32  
33  
34  
35  
36  
37  
38  
39  
40  
41  
42  
43  
44  
45  
46  
47  
48  
49  
50  
51  
52  
53  
54  
55  
56  
57  
58  
59  
60

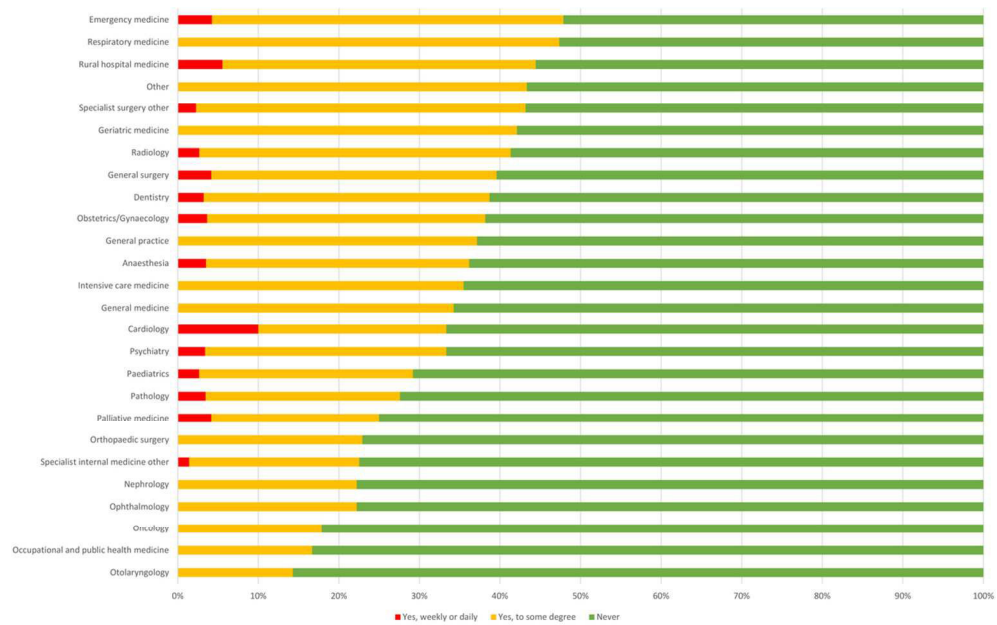

110x70mm (300 x 300 DPI)

view only

1  
2  
3  
4  
5  
6  
7  
8  
9  
10  
11  
12  
13  
14  
15  
16  
17  
18  
19  
20  
21  
22  
23  
24  
25  
26  
27  
28  
29  
30  
31  
32  
33  
34  
35  
36  
37  
38  
39  
40  
41  
42  
43  
44  
45  
46  
47  
48  
49  
50  
51  
52  
53  
54  
55  
56  
57  
58  
59  
60

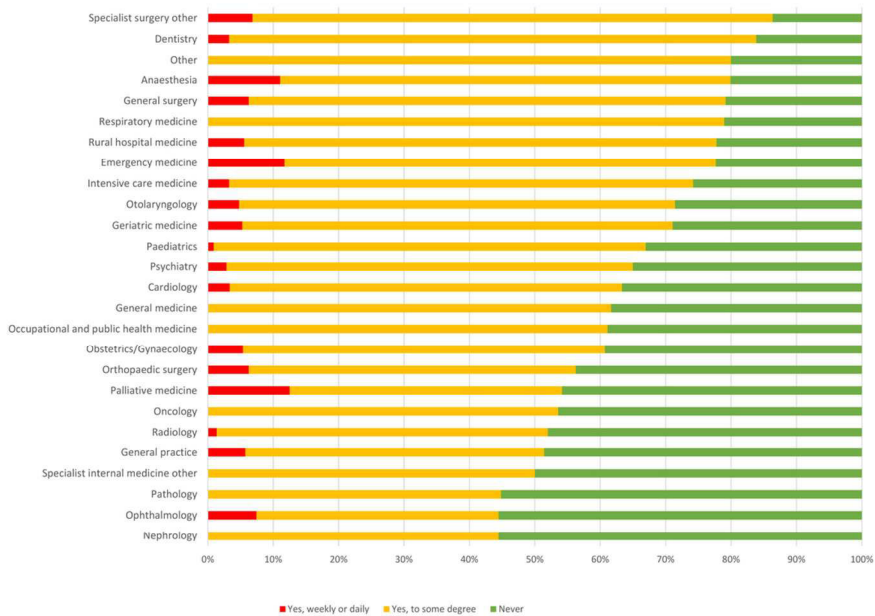

113x73mm (300 x 300 DPI)

view only



**STROBE 2007 (v4) Statement—Checklist of items that should be included in reports of *cross-sectional studies***

| Section/Topic                | Item # | Recommendation                                                                                                                                                                       | Reported on page # |
|------------------------------|--------|--------------------------------------------------------------------------------------------------------------------------------------------------------------------------------------|--------------------|
| <b>Title and abstract</b>    | 1      | (a) Indicate the study’s design with a commonly used term in the title or the abstract                                                                                               | 1                  |
|                              |        | (b) Provide in the abstract an informative and balanced summary of what was done and what was found                                                                                  | 2                  |
| <b>Introduction</b>          |        |                                                                                                                                                                                      |                    |
| Background/rationale         | 2      | Explain the scientific background and rationale for the investigation being reported                                                                                                 | 3                  |
| Objectives                   | 3      | State specific objectives, including any prespecified hypotheses                                                                                                                     | 1                  |
| <b>Methods</b>               |        |                                                                                                                                                                                      |                    |
| Study design                 | 4      | Present key elements of study design early in the paper                                                                                                                              | 4                  |
| Setting                      | 5      | Describe the setting, locations, and relevant dates, including periods of recruitment, exposure, follow-up, and data collection                                                      | 1,4                |
| Participants                 | 6      | (a) Give the eligibility criteria, and the sources and methods of selection of participants                                                                                          | 4                  |
| Variables                    | 7      | Clearly define all outcomes, exposures, predictors, potential confounders, and effect modifiers. Give diagnostic criteria, if applicable                                             | 4-5                |
| Data sources/<br>measurement | 8*     | For each variable of interest, give sources of data and details of methods of assessment (measurement). Describe comparability of assessment methods if there is more than one group | 4-5                |
| Bias                         | 9      | Describe any efforts to address potential sources of bias                                                                                                                            | 14-15              |
| Study size                   | 10     | Explain how the study size was arrived at                                                                                                                                            | 4                  |
| Quantitative variables       | 11     | Explain how quantitative variables were handled in the analyses. If applicable, describe which groupings were chosen and why                                                         | 4-5                |
| Statistical methods          | 12     | (a) Describe all statistical methods, including those used to control for confounding                                                                                                | 4-5                |
|                              |        | (b) Describe any methods used to examine subgroups and interactions                                                                                                                  | 4-5                |
|                              |        | (c) Explain how missing data were addressed                                                                                                                                          | 6                  |
|                              |        | (d) If applicable, describe analytical methods taking account of sampling strategy                                                                                                   |                    |
|                              |        | (e) Describe any sensitivity analyses                                                                                                                                                | 4-5                |
| <b>Results</b>               |        |                                                                                                                                                                                      |                    |

|                          |     |                                                                                                                                                                                                              |                          |
|--------------------------|-----|--------------------------------------------------------------------------------------------------------------------------------------------------------------------------------------------------------------|--------------------------|
| Participants             | 13* | (a) Report numbers of individuals at each stage of study—eg numbers potentially eligible, examined for eligibility, confirmed eligible, included in the study, completing follow-up, and analysed            | 6                        |
|                          |     | (b) Give reasons for non-participation at each stage                                                                                                                                                         | Throughout               |
|                          |     | (c) Consider use of a flow diagram                                                                                                                                                                           | n/a                      |
| Descriptive data         | 14* | (a) Give characteristics of study participants (eg demographic, clinical, social) and information on exposures and potential confounders                                                                     | 6-7                      |
|                          |     | (b) Indicate number of participants with missing data for each variable of interest                                                                                                                          | 7                        |
| Outcome data             | 15* | Report numbers of outcome events or summary measures                                                                                                                                                         | 8-9                      |
| Main results             | 16  | (a) Give unadjusted estimates and, if applicable, confounder-adjusted estimates and their precision (eg, 95% confidence interval). Make clear which confounders were adjusted for and why they were included | Throughout as applicable |
|                          |     | (b) Report category boundaries when continuous variables were categorized                                                                                                                                    | n/a                      |
|                          |     | (c) If relevant, consider translating estimates of relative risk into absolute risk for a meaningful time period                                                                                             | n/a                      |
| Other analyses           | 17  | Report other analyses done—eg analyses of subgroups and interactions, and sensitivity analyses                                                                                                               | 9-10                     |
| <b>Discussion</b>        |     |                                                                                                                                                                                                              |                          |
| Key results              | 18  | Summarise key results with reference to study objectives                                                                                                                                                     | 13                       |
| Limitations              | 19  | Discuss limitations of the study, taking into account sources of potential bias or imprecision. Discuss both direction and magnitude of any potential bias                                                   | 14-15                    |
| Interpretation           | 20  | Give a cautious overall interpretation of results considering objectives, limitations, multiplicity of analyses, results from similar studies, and other relevant evidence                                   | 13-14                    |
| Generalisability         | 21  | Discuss the generalisability (external validity) of the study results                                                                                                                                        | 13-14                    |
| <b>Other information</b> |     |                                                                                                                                                                                                              |                          |
| Funding                  | 22  | Give the source of funding and the role of the funders for the present study and, if applicable, for the original study on which the present article is based                                                | n/a                      |

\*Give information separately for cases and controls in case-control studies and, if applicable, for exposed and unexposed groups in cohort and cross-sectional studies.

**Note:** An Explanation and Elaboration article discusses each checklist item and gives methodological background and published examples of transparent reporting. The STROBE checklist is best used in conjunction with this article (freely available on the Web sites of PLoS Medicine at <http://www.plosmedicine.org/>, Annals of Internal Medicine at <http://www.annals.org/>, and Epidemiology at <http://www.epidem.com/>). Information on the STROBE Initiative is available at [www.strobe-statement.org](http://www.strobe-statement.org).

# BMJ Open

## **“It feels like being trapped in an abusive relationship”: bullying prevalence and consequences in the New Zealand senior medical workforce, a cross-sectional study**

|                                 |                                                                                                                                                                                                                                                                 |
|---------------------------------|-----------------------------------------------------------------------------------------------------------------------------------------------------------------------------------------------------------------------------------------------------------------|
| Journal:                        | <i>BMJ Open</i>                                                                                                                                                                                                                                                 |
| Manuscript ID                   | bmjopen-2017-020158.R1                                                                                                                                                                                                                                          |
| Article Type:                   | Research                                                                                                                                                                                                                                                        |
| Date Submitted by the Author:   | 27-Nov-2017                                                                                                                                                                                                                                                     |
| Complete List of Authors:       | Chambers, Charlotte; The Association of Salaried Medical Specialists, Frampton, Chris; University of Otago Christchurch<br>McKee, Martin; London School of Hygiene and Tropical Medicine<br>Barclay, Murray; University of Otago Christchurch, Gastroenterology |
| <b>Primary Subject Heading</b>: | Medical management                                                                                                                                                                                                                                              |
| Secondary Subject Heading:      | Qualitative research                                                                                                                                                                                                                                            |
| Keywords:                       | Bullying, Medical specialists, New Zealand                                                                                                                                                                                                                      |
|                                 |                                                                                                                                                                                                                                                                 |

SCHOLARONE™  
Manuscripts

1  
2  
3  
4 **Title:** "It feels like being trapped in an abusive relationship": bullying prevalence and  
5 consequences in the New Zealand senior medical workforce; a cross-sectional study  
6

7 **Corresponding author:** Charlotte N. L. Chambers, Ph.D., MSc  
8 Principal Analyst, Association of Salaried Medical Specialists  
9 PO Box 10763, Wellington, 6143, New Zealand  
10  
11 Email: [CC@asms.nz](mailto:CC@asms.nz)  
12  
13 Phone: 0064 4 499 1271  
14  
15 Fax: 0064 4 499 4500

16 **Co-authors:** Christopher M.A. Frampton, Ph.D., BSc,  
17 Professor, University of Otago, Christchurch, New Zealand

18  
19  
20 Martin McKee, CBE MD DSc FMedSci  
21 Professor, London School of Hygiene and Tropical Medicine, London, United Kingdom  
22

23  
24 Murray Barclay, MD, FRACP, AGAF  
25 Clinical Professor, University of Otago, Christchurch, New Zealand  
26

27  
28 Word Count: 4271 words

29 Number of Figures: 2

30 Number of tables: 5

31 Number of references: 37

32 Number of supplementary files: 3  
33  
34

35  
36 Funding statement: This research received no specific grant from any funding agency in the  
37 public, commercial or not-for-profit sectors  
38

39 Competing interest statement: No competing interests declared  
40  
41  
42  
43  
44  
45  
46  
47  
48  
49  
50  
51  
52  
53  
54  
55  
56  
57  
58  
59  
60

## ABSTRACT

**Objectives:** To estimate prevalence of and factors contributing to bullying amongst senior doctors and dentists in New Zealand's public health system, to ascertain rates of reporting bullying behaviour, perceived barriers to reporting and the effects of bullying professionally and personally.

**Design:** Cross-sectional, mixed methods study.

**Setting:** New Zealand.

**Participants:** members of the Association of Salaried Medical Specialists (40.8% response rate).

**Main outcome measures:** Prevalence of bullying was measured using the Negative Acts Questionnaire (revised) (NAQ-r). Workplace demands and level of peer and managerial support were measured with the Health and Safety Executive (HSE) Management Standards Analysis tool. Categories of perpetrators for self-reported and witnessed bullying and barriers to reporting bullying were obtained and qualitative data detailing the consequence of bullying were analysed thematically.

**Results:** The overall prevalence of bullying, measured by the NAQ-r, was 38% (at least 1 negative act on a weekly or daily basis), 37.2% self-reported and 67.5% witnessed. There were significant differences in rates of bullying by specialty ( $p=0.001$ ) with emergency medicine reporting the highest bullying prevalence (47.9%). The most commonly cited perpetrators were other senior medical or dental specialists. 69.6% declined to report their bullying. Bullying across all measures was significantly associated with increasing work demands and lower peer and managerial support ( $p=0.001$ ). Consequences of bullying were wide ranging, affecting workplace environments, personal well-being and subjective quality of patient care.

**Conclusions:** Bullying is prevalent in New Zealand's senior medical workforce and is associated with high workloads and low peer and managerial support. These findings help identify conditions and pressures that may encourage bullying and highlight the significant risk of bullying for individuals and their patients.

## ARTICLE SUMMARY

### Strengths and limitations of the study:

- Strengths include being the first study to report prevalence of bullying using the NAQ-r in a multi-specialty nationwide survey of medical specialists in any country.
- It fills a gap in the otherwise scant literature on senior medical professionals as victims of bullying.
- It extends the understanding of bullying as a multicausal phenomenon, demonstrating the roles of increasing work demands and low peer and managerial support, as well as suggesting opportunities for mitigation.
- Limitations include a moderate participation rate and use of self-reported data
- The cross-sectional design limits the scope for causal inference.

## INTRODUCTION

Workplace bullying in medicine is a cause of on-going concern in several countries. Described as the most 'destructive phenomenon plaguing medical culture'[1] it poses significant risks to patient safety and quality of patient care[2], staff morale and job satisfaction[3] and the physical and psychological wellbeing of doctors and their co-workers[4,5].

Workplace bullying is defined as an escalating process where individuals repeatedly and over a period of time experience negative actions and behaviours from the people they encounter at work[6,7]. Bullying behaviours may range from overt aggression and violence to subtle and indirect acts. The intent of the behaviour(s) is not the primary consideration; it is the impact on and perception of the victim that is key in determining whether or not bullying has occurred[8,9].

The antecedents of workplace bullying are many and complex. The high rates of bullying experienced by junior doctors and trainees, for example, have been ascribed to the hierarchical model of medical training with bullying described as a necessary but unpleasant 'rite of passage'[1,10]. Factors known to encourage bullying include stressful and demanding work environments[11] competitive and unsupportive workplace cultures [8] and normalisation of incivility and rudeness in common conduct[12].

Research commissioned by the Royal Australasian College of Surgeons (RACS) in 2015 found almost half of all surgeons in New Zealand and Australia had experienced some form of inappropriate behaviour, with trainees reporting the highest reported levels of bullying amongst those surveyed[13]. Surgical directors or consultants were found to be the main perpetrators. Much less is known about the prevalence and consequences of bullying experienced by consultants and specialists in other specialities. In the New Zealand context, specialists are defined as any medical practitioner who is vocationally registered by the Medical Council of New Zealand in an approved branch of medicine. Of the known studies that have focussed on senior doctors, the focus has been on bullying prevalence in specific medical specialties for example, Australian general surgery consultants[14], Australasian fellows of the college of intensive care medicine[15] or obstetrics and gynaecology consultants working in the British National Health Service (NHS)[16].

To the best of the authors' knowledge, no studies to date have specifically assessed the prevalence of bullying in medical specialists in a multispecialty, multicentre nationwide survey. This study addresses this knowledge gap by investigating the prevalence of bullying amongst senior doctors and dentists of different specialties working in New Zealand's public health system. The study also explores correlates of experiencing negative behaviours, including medical specialty, gender and ethnicity as well as perceived levels of workplace demands and support from peers and non-clinical managers. Finally, the study examines the nature and extent of barriers to formally reporting bullying behaviour as well as the consequences of bullying on the professional and personal lives of respondents.

## METHODS

### Participants

Participants were members of the Association of Salaried Medical Specialists (ASMS) who are medical and dental specialists, and other non-specialist registered medical officers, employed by New Zealand's 20 District Health Boards (DHBs) and other medical employers around the country such as the national blood service and community health providers. DHBs provide inpatient and outpatient healthcare for geographically defined populations within New Zealand's health system and are the main employers of health professionals working in the public sector. The ASMS is the professional association and union for senior doctors and dentists in New Zealand. For ease of description, these ASMS members are referred to as medical specialists or as the senior medical workforce. At the time of the survey the ASMS represented over 90% of all senior doctors and dentists and other non-vocationally registered medical specialists employed within New Zealand's DHBs and approximately 77% of non-DHB employers.

The entire ASMS membership (4307 individuals) was invited by email to participate voluntarily in an anonymous electronic survey in June 2017. The invitation emphasised the anonymous nature of the survey and noted that analysis would not be undertaken on a line-by-line basis to encourage participation. The survey was deemed outside of scope for ethical review by the New Zealand Health and Disability Ethics Committee (HDEC) due to the anonymous nature of the survey and the type of data requested. The survey was open for 1-month and 4 reminders were sent out to encourage participation. Demographic information, including age, gender, main place of work, ethnicity, and country of primary medical qualification, was requested, summarised and described.

### Measures

Prevalence of workplace bullying was measured with the negative acts questionnaire (revised) (NAQ-r), developed by Einarsen, et al. [17]. The NAQ-r is accepted as a robust tool to quantify bullying in international contexts as it combines both an operational approach to establishing bullying prevalence as well as a single item measure of perceived victimisation[18]. The first part of the NAQ-r scores how often respondents have experienced 22 types of behaviours over the past 6 months (never=1, now and then=2, monthly=3, weekly=4, daily=5). Overall scores were computed with a possible range of 22 (never experienced any behaviours) to 110 (experiencing all behaviours on a daily basis). The NAQ-r comprises three interrelated subscales of bullying; work-related, person-related and physically intimidating bullying, which enables an analysis of the prevalence of the different types of negative behaviours.

After the NAQ-r questions had been answered, a definition of workplace bullying was provided: *'bullying at work refers to situations where one or more persons feel subjected to negative and/or aggressive behaviour from others in the workplace over a period of time and in a situation where they for different reasons are unable to defend themselves against these actions'*[adapted from 19]. On the basis of this definition, respondents were asked whether they had witnessed bullying of other staff or colleagues and whether they had been subjected to bullying over the past 6 months. Responses were on a 5-point Likert scale (never; yes, rarely; yes, now and then; yes, several times per week; and yes, almost daily).

1  
2  
3 Bullying prevalence from the NAQ-r was established according to Leymann's criteria as experiencing  
4 at least one negative act on a daily or weekly basis over a 6 month period[20]. For both witnessed  
5 and self-report responses, bullying was identified if any of the affirmative responses, i.e., very rarely,  
6 now and then, several times a week and almost daily, were endorsed.  
7

8  
9 Those respondents who reported either witnessing or self-reporting bullying were asked to select  
10 the main categories of perpetrators of the bullying and those who self-reported were asked whether  
11 they had reported the behaviours, what the outcomes of reporting were and if they had not  
12 reported them, the main reasons why.  
13

14  
15 Levels of workplace demand (including factors such as workload and the work environment) and  
16 support from colleagues and non-clinical managers were measured using 17 items from the Health  
17 and Safety Executive Management standards analysis tool[21] asking about experiences at work  
18 over the past six months (never=1 to always =5 and work demands never = 5 to always = 1). Total  
19 scores for each of these three subscales were calculated and the scores for workplace demands  
20 reversed, so that higher scores reflected higher demands.  
21  
22

23  
24 A chi-square goodness of fit test was used to compare the mixture of gender and DHB groups in the  
25 respondent group with the known distributions for the full ASMS. Differences in mean scores for the  
26 individual questions in the NAQ-r and the health and safety executive management scales between  
27 demographic, specialty and country of training (NZ v IMG) groups were tested using 1-way Analysis  
28 of variance (ANOVA). The differences in the percentages experiencing the different types of bullying  
29 were compared amongst the groups using chi-square tests. Spearman's correlation coefficients  
30 were used to test the associations between HSE scales and the NAQ-r scales and the frequency of  
31 witnessed and respondent's self-reporting of being bullied. ANOVA was used to test construct  
32 validity between those scoring as a victim of bullying using self-report data and those with higher  
33 total sum scores on the NAQ-r. A two-tailed p-value <0.05 was used to define statistical significance.  
34  
35

36  
37 Qualitative data were extracted from comments from respondents who self-identified as bullied.  
38 These respondents were asked to describe the impact of bullying on their personal and professional  
39 lives. Data from the comments section were imported into NVivo pro (V.11), read through in detail  
40 and open coded. This coding resulted in 23 recurring themes that were grouped into 3 umbrella  
41 categories pertaining to the severity of the consequences of the bullying behaviour, namely  
42 significantly, moderately and little effects/managing, consistent with a study by Shabazz, et al. [16].  
43 This process followed the broad tenets of grounded theory where qualitative data is organised into  
44 emergent themes through iterative coding with the resultant themes understood to reflect the  
45 perspectives of the research participants[22]. Comments selected for inclusion were those that best  
46 expressed the various themes. Comments were transcribed directly, and where sections were  
47 omitted, ellipses ('...') signify the break. Any words replaced or altered to preserve anonymity, tense  
48 or sense are noted within square brackets ('[ ]').  
49  
50  
51  
52  
53  
54  
55  
56  
57  
58  
59  
60



## RESULTS

Responses were received from 40.8% (n=1759) of the ASMS membership. 56.8% (n=862) were male and 43.2% (n=655) female. 242 respondents did not disclose their gender and occasionally other items were not completed. The majority of respondents were New Zealand trained (58.1%) and identified as New Zealand European (Pākehā) (59.4%). 59 specialty and sub-specialties were represented in the study which were grouped into 26 major specialty categories for analyses (see Appendix 1). Some comments left in open text boxes expressed fear of identification and this was also raised in 4 emails despite reassurances in the invitations to participate in the research as to the anonymous nature of the survey. Analysis was undertaken on the most complete data available for each summary or comparison and the actual numbers available are specified throughout. A full demographic summary of respondents is provided in Table 1.

The chi-square goodness of fit tests indicated a slight overrepresentation of females in the sample, (43% compared with 38% in the ASMS) and the overrepresentation of a single DHB in the sample (6% compared with 4%). Apart from these two examples, the respondents were generally representative of the full ASMS membership

**Table 1: Demographic composition of survey respondents**

| <b>Gender</b>                                                     | <b>N</b> | <b>%</b> |
|-------------------------------------------------------------------|----------|----------|
| Females                                                           | 862      | 56.8     |
| Males                                                             | 655      | 43.2     |
| <i>Not disclosed</i>                                              | 242      |          |
| <b>Age bracket</b>                                                | <b>n</b> | <b>%</b> |
| 30-39                                                             | 182      | 11.6     |
| 40-49                                                             | 577      | 36.8     |
| 50-59                                                             | 545      | 34.8     |
| 60-69                                                             | 235      | 15.0     |
| 70 and over                                                       | 29       | 1.8      |
| <i>Not disclosed</i>                                              | 191      |          |
| <b>Ethnicity categories</b>                                       | <b>n</b> | <b>%</b> |
| NZ European/Pākehā                                                | 919      | 59.4     |
| Māori/Pasifika (Samoan, Cook Island Māori, Tongan, Fijian)        | 31       | 2.0      |
| Asian/Indian (Southeast Asian, Chinese, Indian, Other Asian)      | 165      | 10.7     |
| European/other European                                           | 315      | 20.4     |
| Other (Middle Eastern, Latin American/Hispanic, African, 'other') | 117      | 7.6      |
| <i>Not disclosed</i>                                              | 212      |          |
| <b>Country of primary medical qualification</b>                   | <b>n</b> | <b>%</b> |
| New Zealand                                                       | 888      | 58.1     |
| International medical graduate                                    | 638      | 41.9     |
| <i>Not disclosed</i>                                              | 230      |          |
| <b>Medical specialty</b>                                          | <b>n</b> | <b>%</b> |
| Anaesthesia                                                       | 199      | 14.3     |
| Cardiology                                                        | 30       | 2.1      |
| Dentistry                                                         | 31       | 2.2      |
| Emergency medicine                                                | 94       | 6.7      |
| General medicine                                                  | 73       | 5.2      |
| General practice                                                  | 35       | 2.5      |
| General surgery                                                   | 48       | 3.4      |
| Geriatric medicine                                                | 38       | 2.7      |
| Intensive care medicine                                           | 31       | 2.2      |
| Nephrology                                                        | 18       | 1.3      |
| Obstetrics/Gynaecology                                            | 56       | 4.0      |
| Occupational and public health medicine                           | 18       | 1.3      |
| Oncology                                                          | 28       | 2.0      |
| Ophthalmology                                                     | 27       | 1.9      |
| Orthopaedic surgery                                               | 48       | 3.4      |
| Other                                                             | 30       | 2.1      |
| Otolaryngology                                                    | 21       | 1.5      |
| Paediatrics                                                       | 113      | 8.1      |
| Palliative medicine                                               | 24       | 1.7      |
| Pathology                                                         | 29       | 2.1      |
| Psychiatry                                                        | 178      | 12.8     |
| Radiology                                                         | 75       | 5.4      |
| Respiratory medicine                                              | 19       | 1.4      |
| Rural hospital medicine                                           | 18       | 1.3      |
| Specialist internal medicine other                                | 71       | 5.1      |
| Specialist surgery other                                          | 44       | 3.2      |
| <i>Not disclosed</i>                                              | 363      |          |

### Prevalence of negative behaviours

The overall mean NAQ-r score was 31.4, with a maximum score of 102. Based on the NAQ-r, 93% (n=1575) of respondents had experienced at least one negative behaviour at least once over the last 6 months and 38.1% (n=645) had experienced at least one negative behaviour on a daily or weekly basis. 24.9% had experienced two negative behaviours on a weekly or daily basis and 6.7% (n=114) had experienced at least 5 on a daily or weekly basis.

Analysis of the NAQ-r subscales revealed negative work-related behaviours (49.9%) were more prevalent and occurred on a more regular basis than negative person-related (25.3%) or physically intimidating behaviours (16.7%). The most prevalent work-related behaviours experienced on a daily or weekly basis were being exposed to an unmanageable workload (21.2%) and being ordered to do work below your level of competence (14.4%). Being ignored or excluded and having key areas of responsibility removed or replaced with more trivial or unpleasant tasks were the most frequently experienced negative person-related behaviours occurring on a weekly or daily basis (9% and 7.3% respectively). While infrequent, 24 respondents (1.4%) had experienced being shouted at or spontaneous anger on a weekly or daily basis and 11 (0.7%) had experienced threats of violence or actual abuse at the same frequency. Detailed scores for all 22 NAQ-r behaviours are presented in Figure 1.

There was no significant difference in the overall mean NAQ-r score by gender (female mean=32.7, male mean=32.3) although women (mean 3.72) had a significantly higher mean NAQ-r sub-scale score for physically intimidating behaviour than men (mean 3.55),  $p=0.011$ . A higher proportion of female respondents experienced at least one or more negative behaviours than their male counterparts (94.8% vs. 91%,  $p=0.004$ ). Specific questions in the NAQ-r for which women had a higher mean score are noted with # in Figure 1.

There were significant differences in mean scores by age-group ( $p<0.001$ ). Respondents aged 40-49 and 50-59 had higher than average NAQ-r scores and further analysis of frequency scores found respondents aged 40-49 and 50-59 also experienced significantly higher prevalence of bullying behaviours than other age groups. Specific questions in the NAQ-r for which there was significant variance by age group are noted with \* in Figure 1.

Ethnicity was significantly associated with experiencing one or more negative behaviours ( $p=0.037$ ) with Asian ethnicities reporting the lowest prevalence (89.1%) overall. There were no significant associations of ethnicity with overall or sub-scale mean scores but some ethnicities experienced higher levels of some behaviours noted by \$ in Figure 1. International medical graduates (IMGs) reported significantly higher mean scores for person-related bullying than New Zealand trained specialists (16.7 vs. 15.9,  $p=0.012$ ) and reported higher levels of experiencing 5 behaviours (noted with @ in Figure 1) than New Zealand trained specialists.

There were significant differences amongst the medical specialties in the NAQ-r overall mean ( $p=0.032$ ) and subscale scores as well as prevalence of negative behaviours ( $p=0.006$ ). Specialists in emergency medicine and general surgery reported the two highest mean overall NAQ-r scores (35.8 and 35.7 respectively). Respondents from emergency medicine had the highest mean sub-scale scores for work-related and physically intimidating bullying behaviour (14.4 and 4.2 respectively) as

well as the highest prevalence of bullying behaviours experienced on a weekly or daily basis (55.7%). Behaviours with significant effects of medical specialty are noted with ∞ in Figure 1. Prevalence of experiencing at least one negative behaviour (NAQ-r) by medical specialty is summarised in Figure 2.

**Figure 1: Frequency and percentage of respondents experiencing negative behaviours over the past 6 months (NAQ-r)** Sub-scale questions: 1= Work-related bullying 2=person-related bullying 3=physically intimidating bullying.

^ = collapsed frequencies of 'now and then' and monthly

\* behaviours with significant variance by age group

# behaviours with a significantly higher prevalence for female respondents compared to male respondents

\$ behaviours with significant variance by ethnicity

@ behaviours with significantly higher prevalence for IMG respondents compared to NZ-trained respondents

∞behaviours with significant variance by medical specialty

**Figure 2: Prevalence of experiencing at least one negative behaviour (NAQ-r) by medical specialty.**

**Overall prevalence of self-report and witnessed bullying**

37.2% (n=606) self-reported having been bullied 'to some degree' (i.e. from very rarely to almost daily) over the last 6 months. 2.5% (n=40) reported that they had been bullied either several times a week or almost daily. The corresponding figures for witnessing bullying were almost twice as high with 67.5% (n=1109) reporting that they had witnessed colleagues being bullied to some degree (i.e. from very rarely to almost daily) over the last 6 months. 4.7% (n=78) reported that they had witnessed bullying either several times a week or almost daily. Women were significantly more likely to self-report bullying compared with their male counterparts (39.9% vs 32.3%, p=0.002). There were also significant differences in rates of self-report 'to some degree' (p=0.033) and significant differences in frequency of witnessing bullying (p=0.001 'to some degree' and 'weekly or daily') by medical specialty (supplementary figures a and b). There were no other significant differences in rates of self-report or witnessed bullying rates by other demographic variables. Prevalence data for self-report and witnessed bullying is summarised overall and by gender in Table 2.

**Table 2: Prevalence of self-report and witnessed bullying with significant variance by demographic variable**

|                | Self-report as bullied |      |                     |       |                      |     | Witnessed bullying of other staff or colleagues |      |                     |      |                      |     |
|----------------|------------------------|------|---------------------|-------|----------------------|-----|-------------------------------------------------|------|---------------------|------|----------------------|-----|
|                | No                     |      | Yes, to some degree |       | Yes, weekly or daily |     | No                                              |      | Yes, to some degree |      | Yes, weekly or daily |     |
|                | n                      | %    | n                   | %     | n                    | %   | n                                               | %    | n                   | %    | n                    | %   |
| <b>Overall</b> | 1022                   | 62.8 | 606                 | 37.2  | 40                   | 2.5 | 535                                             | 32.5 | 1109                | 67.5 | 78                   | 4.7 |
| Females        | 392                    | 60.1 | 260                 | 39.9* | 17                   | 2.6 | 199                                             | 30.4 | 455                 | 69.6 | 34                   | 5.2 |
| Males          | 583                    | 67.7 | 278                 | 32.3* | 21                   | 2.4 | 299                                             | 34.8 | 561                 | 65.2 | 40                   | 4.7 |

\*p<0.001

Note: totals for each block differ because of missing data

**Associations with bullying, workplace demands, peer and non-clinical manager support**

Non-parametric Spearman's correlations revealed significant associations between the three HSE sub-scales, with levels of workplace demands increasing with decreasing levels of peer and managerial support (all correlations >0.28). There was a strong association between being exposed to higher workplace demands and increasing overall NAQ-r and NAQ-r sub-scale scores. Low levels of peer-support were also strongly associated with higher overall NAQ-r and person-related bullying

scores. Similarly, high levels of workplace demands were associated with higher levels of work-related bullying. Witnessing and self-reporting bullying were also associated with high workplace demands, low levels of peer support and low levels of managerial support as detailed in Table 3.

**Table 3: Correlations between bullying measures and levels of workplace demands, peer and managerial support**

| Correlations<br>(Pearson correlation)            | Level of workplace demands | Level of peer support | Level of non-clinical managers' support |
|--------------------------------------------------|----------------------------|-----------------------|-----------------------------------------|
| NAQ-r score                                      | 0.464**                    | -0.574**              | -0.463**                                |
| Physically intimidating bullying sub-scale score | 0.246**                    | -0.319**              | -0.214**                                |
| Person-related bullying sub-scale score          | 0.284**                    | -0.565**              | -0.408**                                |
| Work-related bullying sub-scale score            | 0.608**                    | -0.491**              | -0.464**                                |
| Frequency of witnessing bullying                 | 0.229**                    | -0.315**              | -0.253**                                |
| Frequency of self-reporting as bullied           | 0.379**                    | -0.461**              | -0.379**                                |

\*\*All correlations are statistically significant at  $p < 0.001$

### Perpetrators and reporting of bullying behaviour

Of the 606 respondents who self-reported as bullied, other senior medical or dental staff were the most commonly cited perpetrators (52.5%) followed by non-clinical managers (31.8%) and clinical leaders (24.9%). The largest share of respondents reported that perpetrators were mainly male (36.8%) followed by those reporting equal numbers of male and female (35.5%).

30.4% ( $n=182$ ) of those who self-reported as bullied formally reported the behaviour experienced. Of the 415 who did not report it, 407 provided reasons why. Table 4 details the most common reasons for not reporting. Notably, 43.5% felt that they would not be supported and 42% felt that reporting would make the situation worse.

**Table 4: Summary of reasons for not reporting bullying behavior**

| Why did you not report this behaviour?*                                           | n   | %    |
|-----------------------------------------------------------------------------------|-----|------|
| I was concerned that reporting the issue would make the situation worse           | 171 | 42.0 |
| I did not know who to report the issue to                                         | 45  | 11.1 |
| I felt I would not be supported if I reported the issue                           | 177 | 43.5 |
| I was concerned about the impact that reporting the issue would have on my career | 112 | 27.5 |
| The behaviour stopped and has not recurred                                        | 26  | 6.4  |
| The person I would normally report the issue to is the perpetrator                | 115 | 28.3 |
| Other (please specify)                                                            | 127 | 31.2 |

\*respondents could select more than one reason

Explanations in the 'other' section expressed choosing not to report due to the behaviours being normalised: *"I have come to accept this as the culture of the institution I feel I cannot trust the people who I could report"*. Others noted that the behaviour was something that they accepted as simply part of the job *"[aggressive] behaviour from upset parents has always been part of my job. It makes me feel shaken and I generally would have a cup of tea with a colleague afterwards. Never considered a formal report"*. Some simply stated that *"I have more important things to worry about"*.

Of the 182 who reported their bullying experience, 30.8% noted that the issue was not addressed and the behaviour continued, while 20.9% stated that the issue was addressed but not resolved and the behaviour continued. 'Other' outcomes (28.6%) included the issue being currently under review as well as people noting either a dismissal of the reporting *"I mentioned to head of department and he said, 'yes they can be difficult sometimes' ""* as well as extreme consequences such as resigning or

1  
2  
3 changing roles “[eventually] I resigned and moved to be as far away from possible from the person.  
4 Restructuring later occurred and that person has now left. The service has been traumatised and is  
5 still healing from his 2 years of reign”.

### 8 **Consequences of bullying on professional and personal lives**

9 The effects of bullying, as reported by those who self-identified as having been bullied and chose to  
10 leave comments (n=563), were many and varied with ‘moderate’ consequences the most frequently  
11 reported. Respondents described feeling disillusioned, isolated, fearful, and lacking in trust. Others  
12 detailed the significant personal and professional costs of bullying including depressive episodes and  
13 feelings of burnout. Some detailed feelings of distress and upset when their stress and frustration  
14 spilled over from work into their interactions with partners or children. Thirty one comments  
15 described bullying as significantly circumscribing their ability to innovate or improve clinical service  
16 delivery due to poor communication and a tendency to resort to defensive medical practice. Some  
17 felt that this ultimately affected the timeliness and quality of patient care: “[it] makes you reluctant  
18 to engage a second time to discuss patient management. A delay in or wrong decision to discharge is  
19 then made. Over-monitoring by a non-clinical [manager] then has you working defensively. Add  
20 abuse from patients for not meeting expectations and weekly passive aggressive reminders that  
21 targets are not being met...”. A full summary of themes and illustrative comments is detailed in  
22 Table 5.  
23  
24  
25  
26  
27  
28  
29  
30  
31  
32  
33  
34  
35  
36  
37  
38  
39  
40  
41  
42  
43  
44  
45  
46  
47  
48  
49  
50  
51  
52  
53  
54  
55  
56  
57  
58  
59  
60

**Table 5: Summary of themes and illustrative comments**

| <b>Themes:</b><br>(NB: comments could reference multiple themes simultaneously)                                                                                                                                                                                                                                                                                                                                                                                                                                                                                                                                                                                                                                                                                                                                                                                                                                                                                                                                               | <b>Illustrative comments:</b>                                                                                                                                                                                                                                                                                                                                                                                                                                                                                                                                                                                                                                                                                                                                                                                                                                                                                                                                                                                                                                                                                                                                                                                                                                                                                                                                                                                                                                                                                                                                                                                                                                                                                                                                                                        |
|-------------------------------------------------------------------------------------------------------------------------------------------------------------------------------------------------------------------------------------------------------------------------------------------------------------------------------------------------------------------------------------------------------------------------------------------------------------------------------------------------------------------------------------------------------------------------------------------------------------------------------------------------------------------------------------------------------------------------------------------------------------------------------------------------------------------------------------------------------------------------------------------------------------------------------------------------------------------------------------------------------------------------------|------------------------------------------------------------------------------------------------------------------------------------------------------------------------------------------------------------------------------------------------------------------------------------------------------------------------------------------------------------------------------------------------------------------------------------------------------------------------------------------------------------------------------------------------------------------------------------------------------------------------------------------------------------------------------------------------------------------------------------------------------------------------------------------------------------------------------------------------------------------------------------------------------------------------------------------------------------------------------------------------------------------------------------------------------------------------------------------------------------------------------------------------------------------------------------------------------------------------------------------------------------------------------------------------------------------------------------------------------------------------------------------------------------------------------------------------------------------------------------------------------------------------------------------------------------------------------------------------------------------------------------------------------------------------------------------------------------------------------------------------------------------------------------------------------|
| <b>Minor consequence/coping</b> <ul style="list-style-type: none"> <li>• Dealt with bully personally (n=3)</li> <li>• Coping by acquiescence, retreat, keeping head down (n=21)</li> <li>• Little effect or no significant impact (n=49)</li> </ul>                                                                                                                                                                                                                                                                                                                                                                                                                                                                                                                                                                                                                                                                                                                                                                           | <p>“Recognise the behaviour and dismiss it and remain calm... Does not affect me and I do not try to defend against allegations made. Have had many years of practice.”</p>                                                                                                                                                                                                                                                                                                                                                                                                                                                                                                                                                                                                                                                                                                                                                                                                                                                                                                                                                                                                                                                                                                                                                                                                                                                                                                                                                                                                                                                                                                                                                                                                                          |
| <b>Moderate consequences:</b> <ul style="list-style-type: none"> <li>• Defamation, character attacks, unfounded gossip or rumours (n=12)</li> <li>• Not wanting to go to work (n=20)</li> <li>• Undermining of abilities or professional standing (n=20)</li> <li>• Feeling unappreciated and/or unacknowledged (n=20)</li> <li>• Affected sleep (n=26)</li> <li>• Reduced hours and level of involvement (n=28)</li> <li>• Impeded ability to innovate or improve clinically (n=31)</li> <li>• Anger, irritation, frustration (n=42)</li> <li>• Loss of self-confidence and faith in abilities (n=42)</li> <li>• Affected personal life or home dynamic (n=49)</li> <li>• Compromised ability to work or perform to usual standards (n=51)</li> <li>• Negative work dynamic resulted (n=52)</li> <li>• Affected collegiality and willingness to collaborate (n=59)</li> <li>• Anxiety, loss of trust, faith in system, feeling isolated (n=66)</li> <li>• Disillusionment loss of enjoyment or love of job (n=76)</li> </ul> | <p>“For the first time in 19 years working as a doctor, I dislike coming to work. I am anxious and sleep poorly. I am struggling in my personal relationships because I feel like I should be able to cope but don't seem to be able to...I often feel unsafe now at work, and I worry that my experience here will have a negative impact on future positions I apply for. I am considering leaving the field of medicine because of my experience at this particular DHB.”</p> <p>“As the person doesn't speak, communicate or interact with [me] and hasn't for 2.5 years. I am at a loss as to how to fulfil my role...[I'm ] basically guessing what to do. Plus [I] have been undermined and humiliated and disenfranchised and the staff I give clinical guidance to know it. I have lost confidence in myself and in my professional abilities.”</p> <p>“... Bullying wrecks a whole week. It leads to self-doubt and second guessing. It takes a long time to recover from. It is poorly recognised. It is difficult as an SMO to call out on bullying as it is a sign of weakness. Therefore, many of us put up with it especially in a system where we are overworked with unrealistic schedules and no hope of making an improvement.”</p> <p>“You pull back and do the bare minimum to keep a service running. Bringing the behaviour to the attention of managers further up the pecking order has made no difference. Patient health is at risk.”</p> <p>Professionally it has affected my enjoyment of my job and I am considering moving to another DHB as I feel that I am so intimidated at times that I am unable to do my job to the best of my abilities. At times it is intolerable. The behaviour has caused me stress which has spilled over into my personal life too.</p> |
| <b>Significant consequences</b> <ul style="list-style-type: none"> <li>• Taken leave (n=7)</li> <li>• Burnout, mental health issues, depression (n=25)</li> <li>• Significant stress (n=58)</li> <li>• Contemplating leaving, early retirement, quitting medicine (n=64)</li> </ul>                                                                                                                                                                                                                                                                                                                                                                                                                                                                                                                                                                                                                                                                                                                                           | <p>“I fear going to work. I feel as if I am being watched the whole time. I feel as though it doesn't matter how good my clinical work is, that my manager and [clinical director] will find a way to put a negative spin on it... I have lost confidence in myself as a doctor and a person. I feel disempowered... I am very anxious about work. This affects my sleep, which makes me worry more... I find it harder to trust people in general, and am more defensive...I am less patient with my children, as I feel so stressed. It feels like being trapped in an abusive relationship... I often dream of leaving. I often feel I have wasted my life, investing so much of myself in my work, when it is not valued by my seniors, even though patients value what I do. ...I see patient care compromised, and the quality of the service being eroded. ...I feel ethically compromised every day”</p>                                                                                                                                                                                                                                                                                                                                                                                                                                                                                                                                                                                                                                                                                                                                                                                                                                                                                     |

## DISCUSSION

This study reports the first multicentre multispecialty study into the prevalence of workplace bullying in a senior medical workforce across an entire country, including the sources of such behaviour and rates of and barriers to reporting. It extends existing research by examining associations between bullying prevalence and perceptions of workload and peer and managerial support. It addresses the extensive methodological debate about how to measure workplace bullying, including both 'inside', or self-report measures and 'outside', or peer report methods[23]. It also combines quantitative and qualitative data, with analysis of the latter, describing personal and professional impacts of bullying, further adding to the strengths of this study. Other approaches, such as focus group discussions, or critical incident analysis would not be feasible on a large scale.

Over a third of this sample of senior doctors and dentists working in New Zealand's public health system are regularly exposed to a wide range of negative behaviours at work. Over a third self-report as being bullied and over two thirds report witnessing bullying of colleagues. The results overall suggest exposure to some degree of negative behaviour is ubiquitous in this senior medical workforce, with work-related bullying especially common.

The strong associations between decreasing peer and managerial support, increasing workplace demands and increasing frequencies of all measures of bullying are of note. These findings contribute to the literature which views bullying as a phenomenon with multiple antecedents, and emphasise the impact of stressful workplaces with poor organisational cultures where bullying may be normalised as a coping strategy[6,9,24]. Conversely, these associations suggest that having good relationships with peers and those in managerial positions might act as a buffer against bullying. It is also worth noting that even in workplaces with high stress and demands, bullying is not always an inevitable consequence[12].

The application of the NAQ-r enables both an assessment of the types of behaviours most commonly experienced as well as the frequency of the bullying experienced in a manner that provides for international comparisons as well as highlighting specific issues requiring action. Overall NAQ-r prevalence in this study is higher than the rates of bullying reported in Australasian studies applying the same methodology [14,25] The NAQ-r mean score and 37% self-report prevalence scores were also higher than in other international studies using the NAQ-r such as Carter, et al. [24]. The difference in the rates of self-reported (37%) and witnessed bullying rates (67.5%) is consistent with trends reported in other studies [3,26]. This differential may be ascribed to a reluctance by individuals to self-identify as a 'victim'[27], but it is equally possible that some respondents may witness the same person being bullied thus potentially overreporting bullying prevalence.

The statistically significant differences in NAQ-r mean scores and self-report bullying rates by age, medical specialty, and for some of the sub-scale scores, gender, ethnicity, medical specialty, and country of medical training, are concerning. They suggest that while bullying is experienced across the board, there are pockets of higher prevalence of certain behaviours for specific groups of individuals that warrant further investigation and organisational action. For example, the finding that international medical graduates are more likely to experience person-related bullying should be of concern given New Zealand's high reliance on IMGs[28]



1  
2  
3 The findings from this study confirm the impression given by the existing literature that certain  
4 medical specialties experience higher prevalence of bullying than others. The high self-report  
5 prevalence (47.9%) and NAQ-r scores for specialists in emergency medicine is, methodological  
6 differences notwithstanding, higher than the 34.5% bullying prevalence reported by the Australasian  
7 College of Emergency Medicine which surveyed all fellows of the college, including trainees[29]. At  
8 the time of both surveys, many emergency departments around the country were reporting higher  
9 than usual demands on their services over the winter period[30]. In light of broader workforce  
10 pressures including poor resourcing, staffing shortages and high levels of burnout in this  
11 workforce[31], it is not hard to conceive that negative interpersonal interactions, particularly if they  
12 are already normalised in the workplace, may escalate as a way to 'get things done' in times of  
13 significant stress[32].  
14  
15

16  
17 Also consistent with studies was the finding that other senior medical staff were the main  
18 perpetrators of self-reported and witnessed bullying behaviour (52.5% overall). These findings  
19 highlight the significant problem of peer-to-peer bullying in this section of the medical workforce.  
20 Little research to date has revealed the extent to which other senior medical and dental staff  
21 bullying each other and this finding is, while not entirely unexpected, of great concern.  
22  
23

24 The low rates of reporting, largely due to the fear of exacerbating the situation or not receiving  
25 support, suggests that considerable effort is still required to facilitate better reporting systems and  
26 procedures for handling bullying complaints. It is of further concern that, for the majority of those  
27 who did formally report bullying behaviour, the issue was not addressed and the behaviour  
28 continued. This suggests that despite the rhetoric, much work remains to be done to improve the  
29 outcomes for those who do choose to report.  
30  
31

32  
33 These findings have considerable relevance for those charged with improving the working conditions  
34 of this vital component of the medical workforce. Previous research has revealed a correlation with  
35 sickness absence, although the direction of causation is unclear[33]. A Finnish study found that those  
36 who experienced bullying were more likely to use sedatives and hypnotics, with potential  
37 consequences for their performance[34]. The same study found greater levels of stress in those who  
38 were the victims of bullying and those who observed it, compared with those in workplaces without  
39 bullying. However, they also have implications for those concerned for the quality of patient  
40 care[35]. As explicated in grim detail in the qualitative data, bullying has far-reaching consequences  
41 that do not stop at the individual. Working in an environment where bullying is both witnessed and  
42 experienced has clear consequences for the manner in which medical teams are able to  
43 function[16,36] and deliver the services upon which public health systems depend[2,37].  
44  
45  
46

47 The results of this survey indicate a need for a comprehensive series of interventions not only to  
48 address problematic behaviours but to consider the broader implications of growing workloads,  
49 under-resourcing and understaffing for the health and wellbeing of this medical workforce and their  
50 patients.  
51  
52

53 It is possible that the topic of the survey may have motivated those who have experienced bullying  
54 to respond, resulting in responder bias. Nevertheless, the primary author received a number of  
55 emails from individuals who self-identified as bullied who chose not to participate in the study for a  
56  
57  
58  
59

1  
2  
3 variety of reasons including fear of identification. Thus, research in this area may contradict the  
4 common conception that responder bias favours those affected by the issue at hand. Regardless,  
5 given the moderate response rate, this study cannot be presumed to be representative of the views  
6 or experiences of the senior medical workforce in New Zealand as a whole. The cross-sectional  
7 design of the survey also means that causal relationships cannot be inferred and any discussion of  
8 the associations between demographic and other factors is not meant to imply causality or direction.  
9

- 10  
11 a. Contributorship statement: The research was designed and conducted by Dr Chambers,  
12 statistical analysis was performed by Prof Frampton and analysis and contributions were  
13 received from Prof Barclay and Prof McKee. All authors edited and revised the final  
14 submission and signed off on the final version.  
15  
16  
17 b. Competing interests: There are no competing interests  
18  
19  
20 c. Funding: There are no funders to report for this submission  
21  
22  
23  
24 d. Data sharing statement: no additional data available  
25  
26  
27 e. Acknowledgements: Thanks to members of the ASMS who participated in this research.  
28

## 29 REFERENCES

- 30 1. Jamieson J, Mitchell R, Le Fevre J, Perry A. Bullying and harassment of trainees: An unspoken  
31 emergency? *Emergency Medicine Australasia* 2015;**27**(5):464-67 doi: 10.1111/1742-  
32 6723.12465.  
33 2. Paice E, Smith D. Bullying of trainee doctors is a patient safety issue. *The Clinical Teacher*  
34 2009;**6**(1):13-17 doi: 10.1111/j.1743-498X.2008.00251.x.  
35 3. Quine L. Workplace bullying in nhs community trust: Staff questionnaire survey. *Bmj*  
36 1999;**318**(7178):228-32.  
37 4. Hogh A, Conway PM, Grynderup MB, et al. Negative acts at work as potential bullying behavior  
38 and depression: Examining the direction of the association in a 2-year follow-up study.  
39 *Journal of occupational and environmental medicine* 2016;**58**(3):e72-9 doi:  
40 10.1097/jom.0000000000000622.  
41 5. Kivimäki M, Virtanen M, Vartiainen M, Elovainio M, Vahtera J, Keltikangas-Järvinen L. Workplace  
42 bullying and the risk of cardiovascular disease and depression. *Occupational and*  
43 *environmental medicine* 2003;**60**(10):779-83.  
44 6. Einarsen S. Harassment and bullying at work: A review of the scandinavian approach. *Aggression*  
45 *and violent behavior* 2000;**5**(4):379-401.  
46 7. Einarsen S, Raknes BI. Harassment in the workplace and the victimization of men. *Violence and*  
47 *victims* 1997;**12**(3):247.  
48 8. Matthiesen SB, Einarsen S. Bullying in the workplace: Definition, prevalence, antecedents and  
49 consequences. *International Journal of Organization Theory and Behavior* 2010;**13**(2):202.  
50 9. Salin D. Ways of explaining workplace bullying: A review of enabling, motivating and precipitating  
51 structures and processes in the work environment. *Human Relations* 2003;**56**(10):1213-32  
52 doi: 10.1177/00187267035610003.  
53 10. Fink-Samnick E. The new age of bullying and violence in health care: Part 2: Advancing  
54 professional education, practice culture, and advocacy. *Professional case management*  
55 2016;**21**(3):114-26; quiz E1-2 doi: 10.1097/ncm.0000000000000146.  
56  
57  
58  
59

11. Hoel H, Salin D. 10 organisational antecedents of workplace bullying. *Bullying and emotional abuse in the workplace* 2003:203.
12. Bradley V, Liddle S, Shaw R, et al. Sticks and stones: Investigating rude, dismissive and aggressive communication between doctors. *Clinical medicine* 2015;**15**(6):541-45.
13. Knowles R, Szoke H, Campbell G, et al. Expert advisory group on discrimination, bullying and sexual harassment advising the royal australasian college of surgeons Report to the Royal Australasian College of Surgeons, 2015.
14. Ling M, Young CJ, Shepherd HL, Mak C, Saw RP. Workplace bullying in surgery. *World J Surg* 2016;**40**(11):2560-66 doi: 10.1007/s00268-016-3642-7.
15. Venkatesh B, Corke C, Raper R, et al. Prevalence of bullying, discrimination and sexual harassment among trainees and fellows of the college of intensive care medicine of australia and new zealand. *Critical care and resuscitation* 2016;**18**(4):230.
16. Shabazz T, Parry-Smith W, Oates S, Henderson S, Mountfield J. Consultants as victims of bullying and undermining: A survey of royal college of obstetricians and gynaecologists consultant experiences. *BMJ Open* 2016;**6**(6) doi: 10.1136/bmjopen-2016-011462.
17. Einarsen S, Hoel H, Notelaers G. Measuring exposure to bullying and harassment at work: Validity, factor structure and psychometric properties of the negative acts questionnaire-revised. *Work & Stress* 2009;**23**(1):24-44.
18. Einarsen S, Hoel H, Notelaers G. *Measuring exposure to bullying and harassment at work: Validity, factor structure and psychometric properties of the negative acts questionnaire-revised*, 2009.
19. Einarsen S, Skogstad A. Bullying at work: Epidemiological findings in public and private organizations. *European Journal of Work and Organizational Psychology* 1996;**5**(2):185-201 doi: 10.1080/13594329608414854.
20. Leymann H. Mobbing and psychological terror at workplaces. *Violence Vict* 1990;**5**(2):119-26.
21. HSE. Health and safety executive management standards tool. Secondary Health and safety executive management standards tool 2017. <http://www.hse.gov.uk/stress/standards/index.htm>.
22. Charmaz K. Grounded theory as an emergent method. In: Hesse-Biber SN, Leavy P, eds. *Handbook of emergent methods*. New York: The Guilford Press, 2008:155-72.
23. Cowie H, Naylor P, Rivers I, Smith PK, Pereira B. Measuring workplace bullying. *Aggression and Violent Behavior* 2002;**7**(1):33-51 doi: [https://doi.org/10.1016/S1359-1789\(00\)00034-3](https://doi.org/10.1016/S1359-1789(00)00034-3).
24. Carter M, Thompson N, Crampton P, et al. Workplace bullying in the uk nhs: A questionnaire and interview study on prevalence, impact and barriers to reporting. *BMJ open* 2013;**3**(6):e002628.
25. Bentley T, Catley B, Cooper-Thomas H, Gardner D, O'Driscoll M, Trenberth L. Understanding stress and bullying in new zealand workplaces: Final report to oh&s steering committee. Wellington, New Zealand 2009.
26. Steadman L, Quine L, Jack K, Felix DH, Waumsley J. Experience of workplace bullying behaviours in postgraduate hospital dentists: Questionnaire survey. *Br Dent J* 2009;**207**(8):379-80 doi: 10.1038/sj.bdj.2009.901.
27. Mikkelsen EG, Einarsen S. Bullying in danish work-life: Prevalence and health correlates. *European Journal of Work and Organizational Psychology* 2001;**10**:393-413 doi: <http://dx.doi.org/10.1080/13594320143000816s>.
28. Zealand MCoN. The new zealand medical workforce in 2013 and 2014. Wellington, New Zealand: Medical Council of New Zealand, 2016.
29. ACEM. Acem membership consultation paper on discrimination, bullying and sexual harassment: Australasian College for Emergency Medicine 2017.
30. Weber A. Winter ills fill hospitals: 'We simply haven't got the space'. *Secondary Winter ills fill hospitals: 'We simply haven't got the space'* 2017.

- 1  
2  
3 [http://www.radionz.co.nz/news/national/335368/winter-ills-fill-hospitals-we-simply-haven-](http://www.radionz.co.nz/news/national/335368/winter-ills-fill-hospitals-we-simply-havent-got-the-space)  
4 [t-got-the-space.](http://www.radionz.co.nz/news/national/335368/winter-ills-fill-hospitals-we-simply-havent-got-the-space)
- 5 31. Chambers CN, Frampton CM, Barclay M, McKee M. Burnout prevalence in new zealand's public  
6 hospital senior medical workforce: A cross-sectional mixed methods study. *BMJ Open*  
7 2016;**6**(11):e013947 doi: 10.1136/bmjopen-2016-013947.
- 8 32. Bentley TA, Catley B, Cooper-Thomas H, et al. Perceptions of workplace bullying in the new  
9 zealand travel industry: Prevalence and management strategies. *Tourism Management*  
10 2012;**33**(2):351-60 doi: <http://dx.doi.org/10.1016/j.tourman.2011.04.004>.
- 11 33. Kivimäki M, Elovainio M, Vahtera J. Workplace bullying and sickness absence in hospital staff.  
12 *Occupational and Environmental Medicine* 2000;**57**(10):656-60 doi: 10.1136/oem.57.10.656.
- 13 34. Vartia MAL. Consequences of workplace bullying with respect to the well-being of its targets and  
14 the observers of bullying. *Scandinavian Journal of Work, Environment & Health*  
15 2001;**27**(1):63-69.
- 16 35. Rosenstein AH, O'Daniel M. Impact and implications of disruptive behavior in the perioperative  
17 arena. *Journal of the American College of Surgeons* 2006;**203**(1):96-105 doi:  
18 <https://doi.org/10.1016/j.jamcollsurg.2006.03.027>.
- 19 36. Roche M, Diers D, Duffield C, Catling-Paull C. Violence toward nurses, the work environment, and  
20 patient outcomes. *Journal of Nursing Scholarship* 2010;**42**(1):13-22 doi: 10.1111/j.1547-  
21 5069.2009.01321.x.
- 22 37. Wild JRL, Ferguson HJM, McDermott FD, Hornby ST, Gokani VJ. Undermining and bullying in  
23 surgical training: A review and recommendations by the association of surgeons in training.  
24 *International Journal of Surgery*; **23**:S5-S9 doi: 10.1016/j.ijso.2015.09.017.  
25  
26  
27  
28  
29  
30  
31  
32  
33  
34  
35  
36  
37  
38  
39  
40  
41  
42  
43  
44  
45  
46  
47  
48  
49  
50  
51  
52  
53  
54  
55  
56  
57  
58  
59  
60



Figure 1: Frequency and percentage of respondents experiencing negative behaviours over the past 6 months (NAQ-r)  
 Sub-scale questions: 1= Work-related bullying 2=person-related bullying 3=physically intimidating bullying.  
 ^ = collapsed frequencies of 'now and then' and monthly  
 \* behaviours with significant variance by age group  
 # behaviours with a significantly higher prevalence for female respondents compared to male respondents  
 \$ behaviours with significant variance by ethnicity  
 @ behaviours with significantly higher prevalence for IMG respondents compared to NZ-trained respondents  
 ∞behaviours with significant variance by medical specialty

85x41mm (300 x 300 DPI)

1  
2  
3  
4  
5  
6  
7  
8  
9  
10  
11  
12  
13  
14  
15  
16  
17  
18  
19  
20  
21  
22  
23  
24  
25  
26  
27  
28  
29  
30  
31  
32  
33  
34  
35  
36  
37  
38  
39  
40  
41  
42  
43  
44  
45  
46  
47  
48  
49  
50  
51  
52  
53  
54  
55  
56  
57  
58  
59  
60

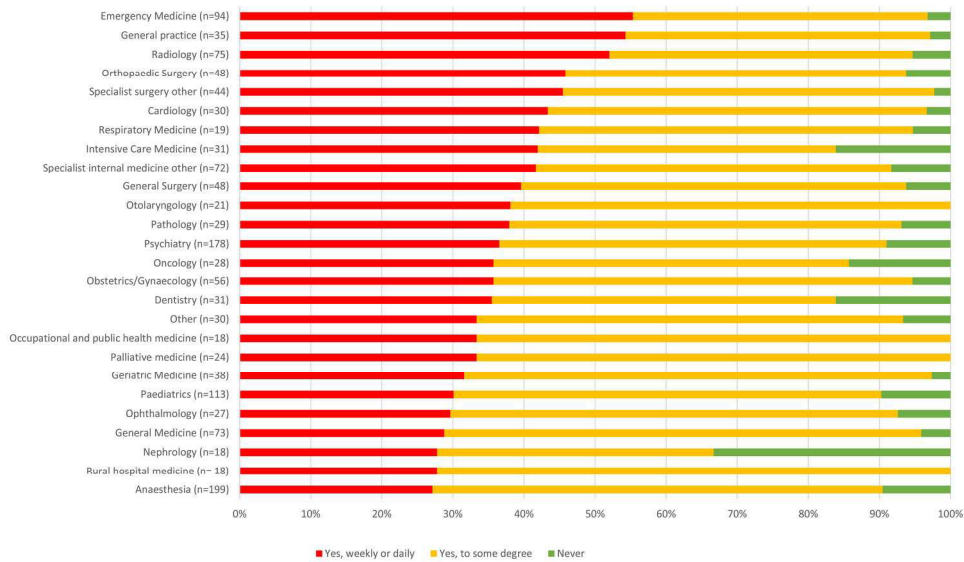

Figure 2: Prevalence of experiencing at least one negative behaviour (NAQ-r) by medical specialty.

103x61mm (600 x 600 DPI)

## Appendix 1

| Grouped specialties:                    | Specialties included:                 | n   |
|-----------------------------------------|---------------------------------------|-----|
| Psychiatry                              | Addiction medicine                    | 6   |
|                                         | Psychiatry                            | 162 |
|                                         | Psychogeriatrics                      | 10  |
|                                         | Specialist surgery 'other'            |     |
|                                         | Cardiothoracic surgery                | 5   |
|                                         | Neurosurgery                          | 4   |
|                                         | Oral & Maxillofacial Surgery          | 3   |
|                                         | Paediatric surgery                    | 4   |
|                                         | Plastic & reconstructive surgery      | 13  |
|                                         | Vascular surgery                      | 10  |
|                                         | Urology                               | 5   |
| Other                                   | Clinical Genetics                     | 3   |
|                                         | Medical Administration                | 3   |
|                                         | Other incl. requests for anonymity    | 20  |
|                                         | Rehabilitation Medicine               | 4   |
| Specialist internal medicine 'other'    | Dermatology                           | 6   |
|                                         | Endocrinology                         | 5   |
|                                         | Gastroenterology                      | 12  |
|                                         | Haematology                           | 15  |
|                                         | Immunology                            | 2   |
|                                         | Infectious Diseases Medicine          | 5   |
|                                         | Neurology                             | 12  |
|                                         | Obstetric Medicine                    | 4   |
|                                         | Rheumatology                          | 11  |
| Paediatrics                             | Developmental Paediatrics             | 2   |
|                                         | Neonatology                           | 10  |
|                                         | Paediatric other                      | 15  |
|                                         | Paediatric oncology                   | 6   |
|                                         | Paediatric haematology                | 1   |
|                                         | Paediatric cardiology                 | 3   |
|                                         | Paediatrics                           | 76  |
| General practice                        | General Practice                      | 21  |
|                                         | Family Planning & Reproductive Health | 4   |
|                                         | Accident & Medical Practice           | 2   |
|                                         | Sexual Health Medicine                | 8   |
| Oncology                                | Medical Oncology                      | 18  |
|                                         | Radiation Oncology                    | 10  |
| Occupational and public health medicine | Occupational Medicine                 | 3   |
|                                         | Public Health Medicine                | 15  |
| Anaesthesia                             | Anaesthesia                           | 191 |
|                                         | Pain Medicine                         | 8   |
| Palliative medicine                     | Paediatric palliative care            | 1   |
|                                         | Palliative Medicine                   | 23  |

1  
2  
3  
4  
5  
6  
7  
8  
9  
10  
11  
12  
13  
14  
15  
16  
17  
18  
19  
20  
21  
22  
23  
24  
25  
26  
27  
28  
29  
30  
31  
32  
33  
34  
35  
36  
37  
38  
39  
40  
41  
42  
43  
44  
45  
46  
47  
48  
49  
50  
51  
52  
53  
54  
55  
56  
57  
58  
59  
60



110x70mm (300 x 300 DPI)

view only



1  
2  
3  
4  
5  
6  
7  
8  
9  
10  
11  
12  
13  
14  
15  
16  
17  
18  
19  
20  
21  
22  
23  
24  
25  
26  
27  
28  
29  
30  
31  
32  
33  
34  
35  
36  
37  
38  
39  
40  
41  
42  
43  
44  
45  
46  
47  
48  
49  
50  
51  
52  
53  
54  
55  
56  
57  
58  
59  
60

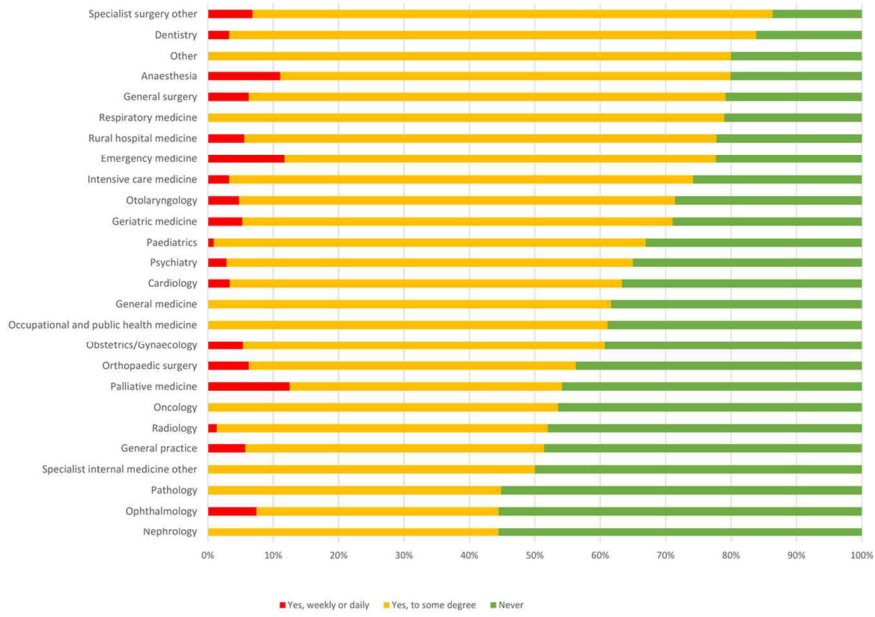

113x73mm (300 x 300 DPI)

view only

**STROBE 2007 (v4) Statement—Checklist of items that should be included in reports of *cross-sectional studies***

| Section/Topic             | Item # | Recommendation                                                                                                                                                                       | Reported on page # |
|---------------------------|--------|--------------------------------------------------------------------------------------------------------------------------------------------------------------------------------------|--------------------|
| <b>Title and abstract</b> | 1      | (a) Indicate the study’s design with a commonly used term in the title or the abstract                                                                                               | 1                  |
|                           |        | (b) Provide in the abstract an informative and balanced summary of what was done and what was found                                                                                  | 2                  |
| <b>Introduction</b>       |        |                                                                                                                                                                                      |                    |
| Background/rationale      | 2      | Explain the scientific background and rationale for the investigation being reported                                                                                                 | 3                  |
| Objectives                | 3      | State specific objectives, including any prespecified hypotheses                                                                                                                     | 1                  |
| <b>Methods</b>            |        |                                                                                                                                                                                      |                    |
| Study design              | 4      | Present key elements of study design early in the paper                                                                                                                              | 4                  |
| Setting                   | 5      | Describe the setting, locations, and relevant dates, including periods of recruitment, exposure, follow-up, and data collection                                                      | 1,4                |
| Participants              | 6      | (a) Give the eligibility criteria, and the sources and methods of selection of participants                                                                                          | 4                  |
| Variables                 | 7      | Clearly define all outcomes, exposures, predictors, potential confounders, and effect modifiers. Give diagnostic criteria, if applicable                                             | 4-5                |
| Data sources/ measurement | 8*     | For each variable of interest, give sources of data and details of methods of assessment (measurement). Describe comparability of assessment methods if there is more than one group | 4-5                |
| Bias                      | 9      | Describe any efforts to address potential sources of bias                                                                                                                            | 14-15              |
| Study size                | 10     | Explain how the study size was arrived at                                                                                                                                            | 4                  |
| Quantitative variables    | 11     | Explain how quantitative variables were handled in the analyses. If applicable, describe which groupings were chosen and why                                                         | 4-5                |
| Statistical methods       | 12     | (a) Describe all statistical methods, including those used to control for confounding                                                                                                | 4-5                |
|                           |        | (b) Describe any methods used to examine subgroups and interactions                                                                                                                  | 4-5                |
|                           |        | (c) Explain how missing data were addressed                                                                                                                                          | 6                  |
|                           |        | (d) If applicable, describe analytical methods taking account of sampling strategy                                                                                                   |                    |
|                           |        | (e) Describe any sensitivity analyses                                                                                                                                                | 4-5                |
| <b>Results</b>            |        |                                                                                                                                                                                      |                    |

|                          |     |                                                                                                                                                                                                              |                          |
|--------------------------|-----|--------------------------------------------------------------------------------------------------------------------------------------------------------------------------------------------------------------|--------------------------|
| Participants             | 13* | (a) Report numbers of individuals at each stage of study—eg numbers potentially eligible, examined for eligibility, confirmed eligible, included in the study, completing follow-up, and analysed            | 6                        |
|                          |     | (b) Give reasons for non-participation at each stage                                                                                                                                                         | Throughout               |
|                          |     | (c) Consider use of a flow diagram                                                                                                                                                                           | n/a                      |
| Descriptive data         | 14* | (a) Give characteristics of study participants (eg demographic, clinical, social) and information on exposures and potential confounders                                                                     | 6-7                      |
|                          |     | (b) Indicate number of participants with missing data for each variable of interest                                                                                                                          | 7                        |
| Outcome data             | 15* | Report numbers of outcome events or summary measures                                                                                                                                                         | 8-9                      |
| Main results             | 16  | (a) Give unadjusted estimates and, if applicable, confounder-adjusted estimates and their precision (eg, 95% confidence interval). Make clear which confounders were adjusted for and why they were included | Throughout as applicable |
|                          |     | (b) Report category boundaries when continuous variables were categorized                                                                                                                                    | n/a                      |
|                          |     | (c) If relevant, consider translating estimates of relative risk into absolute risk for a meaningful time period                                                                                             | n/a                      |
| Other analyses           | 17  | Report other analyses done—eg analyses of subgroups and interactions, and sensitivity analyses                                                                                                               | 9-10                     |
| <b>Discussion</b>        |     |                                                                                                                                                                                                              |                          |
| Key results              | 18  | Summarise key results with reference to study objectives                                                                                                                                                     | 13                       |
| Limitations              | 19  | Discuss limitations of the study, taking into account sources of potential bias or imprecision. Discuss both direction and magnitude of any potential bias                                                   | 14-15                    |
| Interpretation           | 20  | Give a cautious overall interpretation of results considering objectives, limitations, multiplicity of analyses, results from similar studies, and other relevant evidence                                   | 13-14                    |
| Generalisability         | 21  | Discuss the generalisability (external validity) of the study results                                                                                                                                        | 13-14                    |
| <b>Other information</b> |     |                                                                                                                                                                                                              |                          |
| Funding                  | 22  | Give the source of funding and the role of the funders for the present study and, if applicable, for the original study on which the present article is based                                                | n/a                      |

\*Give information separately for cases and controls in case-control studies and, if applicable, for exposed and unexposed groups in cohort and cross-sectional studies.

**Note:** An Explanation and Elaboration article discusses each checklist item and gives methodological background and published examples of transparent reporting. The STROBE checklist is best used in conjunction with this article (freely available on the Web sites of PLoS Medicine at <http://www.plosmedicine.org/>, Annals of Internal Medicine at <http://www.annals.org/>, and Epidemiology at <http://www.epidem.com/>). Information on the STROBE Initiative is available at [www.strobe-statement.org](http://www.strobe-statement.org).

# BMJ Open

**“It feels like being trapped in an abusive relationship”:  
bullying prevalence and consequences in the New Zealand  
senior medical workforce; a cross-sectional study**

|                                 |                                                                                                                                                                                                                                                                 |
|---------------------------------|-----------------------------------------------------------------------------------------------------------------------------------------------------------------------------------------------------------------------------------------------------------------|
| Journal:                        | <i>BMJ Open</i>                                                                                                                                                                                                                                                 |
| Manuscript ID                   | bmjopen-2017-020158.R2                                                                                                                                                                                                                                          |
| Article Type:                   | Research                                                                                                                                                                                                                                                        |
| Date Submitted by the Author:   | 17-Dec-2017                                                                                                                                                                                                                                                     |
| Complete List of Authors:       | Chambers, Charlotte; The Association of Salaried Medical Specialists, Frampton, Chris; University of Otago Christchurch<br>McKee, Martin; London School of Hygiene and Tropical Medicine<br>Barclay, Murray; University of Otago Christchurch, Gastroenterology |
| <b>Primary Subject Heading</b>: | Medical management                                                                                                                                                                                                                                              |
| Secondary Subject Heading:      | Qualitative research                                                                                                                                                                                                                                            |
| Keywords:                       | Bullying, Medical specialists, New Zealand                                                                                                                                                                                                                      |
|                                 |                                                                                                                                                                                                                                                                 |

SCHOLARONE™  
Manuscripts

1  
2  
3  
4 **Title:** "It feels like being trapped in an abusive relationship": bullying prevalence and  
5 consequences in the New Zealand senior medical workforce; a cross-sectional study  
6

7 **Corresponding author:** Charlotte N. L. Chambers, Ph.D., MSc  
8 Principal Analyst, Association of Salaried Medical Specialists  
9 PO Box 10763, Wellington, 6143, New Zealand  
10  
11 Email: [CC@asms.nz](mailto:CC@asms.nz)  
12  
13 Phone: 0064 4 499 1271  
14  
15 Fax: 0064 4 499 4500

16 **Co-authors:** Christopher M.A. Frampton, Ph.D., BSc,  
17 Professor, University of Otago, Christchurch, New Zealand

18  
19  
20 Martin McKee, CBE MD DSc FMedSci  
21 Professor, London School of Hygiene and Tropical Medicine, London, United Kingdom  
22

23  
24 Murray Barclay, MD, FRACP, AGAF  
25 Clinical Professor, University of Otago, Christchurch, New Zealand  
26

27  
28 Word Count: 4271 words

29 Number of Figures: 2

30 Number of tables: 5

31 Number of references: 37

32 Number of supplementary files: 3  
33  
34

35  
36 Funding statement: This research received no specific grant from any funding agency in the  
37 public, commercial or not-for-profit sectors  
38

39 Competing interest statement: No competing interests declared  
40  
41  
42  
43  
44  
45  
46  
47  
48  
49  
50  
51  
52  
53  
54  
55  
56  
57  
58  
59  
60

## ABSTRACT

**Objectives:** To estimate prevalence of and factors contributing to bullying amongst senior doctors and dentists in New Zealand's public health system, to ascertain rates of reporting bullying behaviour, perceived barriers to reporting and the effects of bullying professionally and personally.

**Design:** Cross-sectional, mixed methods study.

**Setting:** New Zealand.

**Participants:** members of the Association of Salaried Medical Specialists (40.8% response rate).

**Main outcome measures:** Prevalence of bullying was measured using the Negative Acts Questionnaire (revised) (NAQ-r). Workplace demands and level of peer and managerial support were measured with the Health and Safety Executive (HSE) Management Standards Analysis tool. Categories of perpetrators for self-reported and witnessed bullying and barriers to reporting bullying were obtained and qualitative data detailing the consequence of bullying were analysed thematically.

**Results:** The overall prevalence of bullying, measured by the NAQ-r, was 38% (at least 1 negative act on a weekly or daily basis), 37.2% self-reported and 67.5% witnessed. There were significant differences in rates of bullying by specialty ( $p=0.001$ ) with emergency medicine reporting the highest bullying prevalence (47.9%). The most commonly cited perpetrators were other senior medical or dental specialists. 69.6% declined to report their bullying. Bullying across all measures was significantly associated with increasing work demands and lower peer and managerial support ( $p=0.001$ ). Consequences of bullying were wide ranging, affecting workplace environments, personal well-being and subjective quality of patient care.

**Conclusions:** Bullying is prevalent in New Zealand's senior medical workforce and is associated with high workloads and low peer and managerial support. These findings help identify conditions and pressures that may encourage bullying and highlight the significant risk of bullying for individuals and their patients.

## ARTICLE SUMMARY

### Strengths and limitations of the study:

- Strengths include being the first study to report prevalence of bullying using the NAQ-r in a multi-specialty nationwide survey of medical specialists in any country.
- It fills a gap in the otherwise scant literature on senior medical professionals as victims of bullying.
- It extends the understanding of bullying as a multicausal phenomenon, demonstrating the roles of increasing work demands and low peer and managerial support, as well as suggesting opportunities for mitigation.
- Limitations include a moderate participation rate and use of self-reported data
- The cross-sectional design limits the scope for causal inference.

## INTRODUCTION

Workplace bullying in medicine is a cause of on-going concern in several countries. Described as the most 'destructive phenomenon plaguing medical culture'[1] it poses significant risks to patient safety and quality of patient care[2], staff morale and job satisfaction[3] and the physical and psychological wellbeing of doctors and their co-workers[4,5].

Workplace bullying is defined as an escalating process where individuals repeatedly and over a period of time experience negative actions and behaviours from the people they encounter at work[6,7]. Bullying behaviours may range from overt aggression and violence to subtle and indirect acts. The intent of the behaviour(s) is not the primary consideration; it is the impact on and perception of the victim that is key in determining whether or not bullying has occurred[8,9].

The antecedents of workplace bullying are many and complex. The high rates of bullying experienced by junior doctors and trainees, for example, have been ascribed to the hierarchical model of medical training with bullying described as a necessary but unpleasant 'rite of passage'[1,10]. Factors known to encourage bullying include stressful and demanding work environments[11] competitive and unsupportive workplace cultures [8] and normalisation of incivility and rudeness in common conduct[12].

Research commissioned by the Royal Australasian College of Surgeons (RACS) in 2015 found almost half of all surgeons in New Zealand and Australia had experienced some form of inappropriate behaviour, with trainees reporting the highest reported levels of bullying amongst those surveyed[13]. Surgical directors or consultants were found to be the main perpetrators. Much less is known about the prevalence and consequences of bullying experienced by consultants and specialists in other specialities. In the New Zealand context, specialists are defined as any medical practitioner who is vocationally registered by the Medical Council of New Zealand in an approved branch of medicine. Of the known studies that have focussed on senior doctors, the focus has been on bullying prevalence in specific medical specialties for example, Australian general surgery consultants[14], Australasian fellows of the college of intensive care medicine[15] or obstetrics and gynaecology consultants working in the British National Health Service (NHS)[16].

To the best of the authors' knowledge, no studies to date have specifically assessed the prevalence of bullying in medical specialists in a multispecialty, multicentre nationwide survey. This study addresses this knowledge gap by investigating the prevalence of bullying amongst senior doctors and dentists of different specialties working in New Zealand's public health system. The study also explores correlates of experiencing negative behaviours, including medical specialty, gender and ethnicity as well as perceived levels of workplace demands and support from peers and non-clinical managers. Finally, the study examines the nature and extent of barriers to formally reporting bullying behaviour as well as the consequences of bullying on the professional and personal lives of respondents.

## METHODS

### Participants

Participants were members of the Association of Salaried Medical Specialists (ASMS) who are medical and dental specialists, and other non-specialist registered medical officers, employed by New Zealand's 20 District Health Boards (DHBs) and other medical employers around the country such as the national blood service and community health providers. DHBs provide inpatient and outpatient healthcare for geographically defined populations within New Zealand's health system and are the main employers of health professionals working in the public sector. The ASMS is the professional association and union for senior doctors and dentists in New Zealand. For ease of description, these ASMS members are referred to as medical specialists or as the senior medical workforce. At the time of the survey the ASMS represented over 90% of all senior doctors and dentists and other non-vocationally registered medical specialists employed within New Zealand's DHBs and approximately 77% of non-DHB employers.

The entire ASMS membership (4307 individuals) was invited by email to participate voluntarily in an anonymous electronic survey in June 2017. The invitation emphasised the anonymous nature of the survey and noted that analysis would not be undertaken on a line-by-line basis to encourage participation. The survey was deemed outside of scope for ethical review by the New Zealand Health and Disability Ethics Committee (HDEC) due to the anonymous nature of the survey and the type of data requested. The survey was open for 1-month and 4 reminders were sent out to encourage participation. Demographic information, including age, gender, main place of work, ethnicity, and country of primary medical qualification, was requested, summarised and described.

### Measures

Prevalence of workplace bullying was measured with the negative acts questionnaire (revised) (NAQ-r), developed by Einarsen, et al. [17]. The NAQ-r is accepted as a robust tool to quantify bullying in international contexts as it combines both an operational approach to establishing bullying prevalence as well as a single item measure of perceived victimisation[18]. The first part of the NAQ-r scores how often respondents have experienced 22 types of behaviours over the past 6 months (never=1, now and then=2, monthly=3, weekly=4, daily=5). Overall scores were computed with a possible range of 22 (never experienced any behaviours) to 110 (experiencing all behaviours on a daily basis). The NAQ-r comprises three interrelated subscales of bullying; work-related, person-related and physically intimidating bullying, which enables an analysis of the prevalence of the different types of negative behaviours.

After the NAQ-r questions had been answered, a definition of workplace bullying was provided: *'bullying at work refers to situations where one or more persons feel subjected to negative and/or aggressive behaviour from others in the workplace over a period of time and in a situation where they for different reasons are unable to defend themselves against these actions'*[adapted from 19]. On the basis of this definition, respondents were asked whether they had witnessed bullying of other staff or colleagues and whether they had been subjected to bullying over the past 6 months. Responses were on a 5-point Likert scale (never; yes, rarely; yes, now and then; yes, several times per week; and yes, almost daily).



1  
2  
3 Bullying prevalence from the NAQ-r was established according to Leymann's criteria as experiencing  
4 at least one negative act on a daily or weekly basis over a 6 month period[20]. For both witnessed  
5 and self-report responses, bullying was identified if any of the affirmative responses, i.e., very rarely,  
6 now and then, several times a week and almost daily, were endorsed.  
7

8  
9 Those respondents who reported either witnessing or self-reporting bullying were asked to select  
10 the main categories of perpetrators of the bullying and those who self-reported were asked whether  
11 they had reported the behaviours, what the outcomes of reporting were and if they had not  
12 reported them, the main reasons why.  
13

14  
15 Levels of workplace demand (including factors such as workload and the work environment) and  
16 support from colleagues and non-clinical managers were measured using 17 items from the Health  
17 and Safety Executive Management standards analysis tool[21] asking about experiences at work  
18 over the past six months (never=1 to always =5 and work demands never = 5 to always = 1). Total  
19 scores for each of these three subscales were calculated and the scores for workplace demands  
20 reversed, so that higher scores reflected higher demands.  
21  
22

23  
24 A chi-square goodness of fit test was used to compare the mixture of gender and DHB groups in the  
25 respondent group with the known distributions for the full ASMS. Differences in mean scores for the  
26 individual questions in the NAQ-r and the health and safety executive management scales between  
27 demographic, specialty and country of training (NZ v IMG) groups were tested using 1-way Analysis  
28 of variance (ANOVA). The differences in the percentages experiencing the different types of bullying  
29 were compared amongst the groups using chi-square tests. Spearman's correlation coefficients  
30 were used to test the associations between HSE scales and the NAQ-r scales and the frequency of  
31 witnessed and respondent's self-reporting of being bullied. ANOVA was used to test construct  
32 validity between those scoring as a victim of bullying using self-report data and those with higher  
33 total sum scores on the NAQ-r. A two-tailed p-value <0.05 was used to define statistical significance.  
34  
35

36  
37 Qualitative data were extracted from comments from respondents who self-identified as bullied.  
38 These respondents were asked to describe the impact of bullying on their personal and professional  
39 lives. Data from the comments section were imported into NVivo pro (V.11), read through in detail  
40 and open coded. This coding resulted in 23 recurring themes that were grouped into 3 umbrella  
41 categories pertaining to the severity of the consequences of the bullying behaviour, namely  
42 significantly, moderately and little effects/managing, consistent with a study by Shabazz, et al. [16].  
43 This process followed the broad tenets of grounded theory where qualitative data is organised into  
44 emergent themes through iterative coding with the resultant themes understood to reflect the  
45 perspectives of the research participants[22]. Comments selected for inclusion were those that best  
46 expressed the various themes. Comments were transcribed directly, and where sections were  
47 omitted, ellipses ('...') signify the break. Any words replaced or altered to preserve anonymity, tense  
48 or sense are noted within square brackets ('[ ]').  
49  
50  
51  
52  
53  
54  
55  
56  
57  
58  
59  
60

## RESULTS

Responses were received from 40.8% (n=1759) of the ASMS membership. 56.8% (n=862) were male and 43.2% (n=655) female. 242 respondents did not disclose their gender and occasionally other items were not completed. The majority of respondents were New Zealand trained (58.1%) and identified as New Zealand European (Pākehā) (59.4%). 59 specialty and sub-specialties were represented in the study which were grouped into 26 major specialty categories for analyses (see Appendix 1). Some comments left in open text boxes expressed fear of identification and this was also raised in 4 emails despite reassurances in the invitations to participate in the research as to the anonymous nature of the survey. Analysis was undertaken on the most complete data available for each summary or comparison and the actual numbers available are specified throughout. A full demographic summary of respondents is provided in Table 1.

The chi-square goodness of fit tests indicated a slight overrepresentation of females in the sample, (43% compared with 38% in the ASMS) and the overrepresentation of a single DHB in the sample (6% compared with 4%). Apart from these two examples, the respondents were generally representative of the full ASMS membership

**Table 1: Demographic composition of survey respondents**

| <b>Gender</b>                                                     | <b>N</b> | <b>%</b> |
|-------------------------------------------------------------------|----------|----------|
| Females                                                           | 862      | 56.8     |
| Males                                                             | 655      | 43.2     |
| <i>Not disclosed</i>                                              | 242      |          |
| <b>Age bracket</b>                                                | <b>n</b> | <b>%</b> |
| 30-39                                                             | 182      | 11.6     |
| 40-49                                                             | 577      | 36.8     |
| 50-59                                                             | 545      | 34.8     |
| 60-69                                                             | 235      | 15.0     |
| 70 and over                                                       | 29       | 1.8      |
| <i>Not disclosed</i>                                              | 191      |          |
| <b>Ethnicity categories</b>                                       | <b>n</b> | <b>%</b> |
| NZ European/Pākehā                                                | 919      | 59.4     |
| Māori/Pasifika (Samoan, Cook Island Māori, Tongan, Fijian)        | 31       | 2.0      |
| Asian/Indian (Southeast Asian, Chinese, Indian, Other Asian)      | 165      | 10.7     |
| European/other European                                           | 315      | 20.4     |
| Other (Middle Eastern, Latin American/Hispanic, African, 'other') | 117      | 7.6      |
| <i>Not disclosed</i>                                              | 212      |          |
| <b>Country of primary medical qualification</b>                   | <b>n</b> | <b>%</b> |
| New Zealand                                                       | 888      | 58.1     |
| International medical graduate                                    | 638      | 41.9     |
| <i>Not disclosed</i>                                              | 230      |          |
| <b>Medical specialty</b>                                          | <b>n</b> | <b>%</b> |
| Anaesthesia                                                       | 199      | 14.3     |
| Cardiology                                                        | 30       | 2.1      |
| Dentistry                                                         | 31       | 2.2      |
| Emergency medicine                                                | 94       | 6.7      |
| General medicine                                                  | 73       | 5.2      |
| General practice                                                  | 35       | 2.5      |
| General surgery                                                   | 48       | 3.4      |
| Geriatric medicine                                                | 38       | 2.7      |
| Intensive care medicine                                           | 31       | 2.2      |
| Nephrology                                                        | 18       | 1.3      |
| Obstetrics/Gynaecology                                            | 56       | 4.0      |
| Occupational and public health medicine                           | 18       | 1.3      |
| Oncology                                                          | 28       | 2.0      |
| Ophthalmology                                                     | 27       | 1.9      |
| Orthopaedic surgery                                               | 48       | 3.4      |
| Other                                                             | 30       | 2.1      |
| Otolaryngology                                                    | 21       | 1.5      |
| Paediatrics                                                       | 113      | 8.1      |
| Palliative medicine                                               | 24       | 1.7      |
| Pathology                                                         | 29       | 2.1      |
| Psychiatry                                                        | 178      | 12.8     |
| Radiology                                                         | 75       | 5.4      |
| Respiratory medicine                                              | 19       | 1.4      |
| Rural hospital medicine                                           | 18       | 1.3      |
| Specialist internal medicine other                                | 71       | 5.1      |
| Specialist surgery other                                          | 44       | 3.2      |
| <i>Not disclosed</i>                                              | 363      |          |

### Prevalence of negative behaviours

The overall mean NAQ-r score was 31.4, with a maximum score of 102. Based on the NAQ-r, 93% (n=1575) of respondents had experienced at least one negative behaviour at least once over the last 6 months and 38.1% (n=645) had experienced at least one negative behaviour on a daily or weekly basis. 24.9% had experienced two negative behaviours on a weekly or daily basis and 6.7% (n=114) had experienced at least 5 on a daily or weekly basis.

Analysis of the NAQ-r subscales revealed negative work-related behaviours (49.9%) were more prevalent and occurred on a more regular basis than negative person-related (25.3%) or physically intimidating behaviours (16.7%). The most prevalent work-related behaviours experienced on a daily or weekly basis were being exposed to an unmanageable workload (21.2%) and being ordered to do work below your level of competence (14.4%). Being ignored or excluded and having key areas of responsibility removed or replaced with more trivial or unpleasant tasks were the most frequently experienced negative person-related behaviours occurring on a weekly or daily basis (9% and 7.3% respectively). While infrequent, 24 respondents (1.4%) had experienced being shouted at or spontaneous anger on a weekly or daily basis and 11 (0.7%) had experienced threats of violence or actual abuse at the same frequency. Detailed scores for all 22 NAQ-r behaviours are presented in Figure 1.

There was no significant difference in the overall mean NAQ-r score by gender (female mean=32.7, male mean=32.3) although women (mean 3.72) had a significantly higher mean NAQ-r sub-scale score for physically intimidating behaviour than men (mean 3.55),  $p=0.011$ . A higher proportion of female respondents experienced at least one or more negative behaviours than their male counterparts (94.8% vs. 91%,  $p=0.004$ ). Specific questions in the NAQ-r for which women had a higher mean score are noted with # in Figure 1.

There were significant differences in mean scores by age-group ( $p<0.001$ ). Respondents aged 40-49 and 50-59 had higher than average NAQ-r scores and further analysis of frequency scores found respondents aged 40-49 and 50-59 also experienced significantly higher prevalence of bullying behaviours than other age groups. Specific questions in the NAQ-r for which there was significant variance by age group are noted with \* in Figure 1.

Ethnicity was significantly associated with experiencing one or more negative behaviours ( $p=0.037$ ) with Asian ethnicities reporting the lowest prevalence (89.1%) overall. There were no significant associations of ethnicity with overall or sub-scale mean scores but some ethnicities experienced higher levels of some behaviours noted by \$ in Figure 1. International medical graduates (IMGs) reported significantly higher mean scores for person-related bullying than New Zealand trained specialists (16.7 vs. 15.9,  $p=0.012$ ) and reported higher levels of experiencing 5 behaviours (noted with @ in Figure 1) than New Zealand trained specialists.

There were significant differences amongst the medical specialties in the NAQ-r overall mean ( $p=0.032$ ) and subscale scores as well as prevalence of negative behaviours ( $p=0.006$ ). Specialists in emergency medicine and general surgery reported the two highest mean overall NAQ-r scores (35.8 and 35.7 respectively). Respondents from emergency medicine had the highest mean sub-scale scores for work-related and physically intimidating bullying behaviour (14.4 and 4.2 respectively) as

well as the highest prevalence of bullying behaviours experienced on a weekly or daily basis (55.7%). Behaviours with significant effects of medical specialty are noted with ∞ in Figure 1. Prevalence of experiencing at least one negative behaviour (NAQ-r) by medical specialty is summarised in Figure 2.

**Figure 1: Frequency and percentage of respondents experiencing negative behaviours over the past 6 months (NAQ-r)** Sub-scale questions: 1= Work-related bullying 2=person-related bullying 3=physically intimidating bullying.

^ = collapsed frequencies of 'now and then' and monthly

\* behaviours with significant variance by age group

# behaviours with a significantly higher prevalence for female respondents compared to male respondents

\$ behaviours with significant variance by ethnicity

@ behaviours with significantly higher prevalence for IMG respondents compared to NZ-trained respondents

∞behaviours with significant variance by medical specialty

**Figure 2: Prevalence of experiencing at least one negative behaviour (NAQ-r) by medical specialty.**

**Overall prevalence of self-report and witnessed bullying**

37.2% (n=606) self-reported having been bullied 'to some degree' (i.e. from very rarely to almost daily) over the last 6 months. 2.5% (n=40) reported that they had been bullied either several times a week or almost daily. The corresponding figures for witnessing bullying were almost twice as high with 67.5% (n=1109) reporting that they had witnessed colleagues being bullied to some degree (i.e. from very rarely to almost daily) over the last 6 months. 4.7% (n=78) reported that they had witnessed bullying either several times a week or almost daily. Women were significantly more likely to self-report bullying compared with their male counterparts (39.9% vs 32.3%, p=0.002). There were also significant differences in rates of self-report 'to some degree' (p=0.033) and significant differences in frequency of witnessing bullying (p=0.001 'to some degree' and 'weekly or daily') by medical specialty (supplementary figures a and b). There were no other significant differences in rates of self-report or witnessed bullying rates by other demographic variables. Prevalence data for self-report and witnessed bullying is summarised overall and by gender in Table 2.

**Table 2: Prevalence of self-report and witnessed bullying with significant variance by demographic variable**

|                | Self-report as bullied |      |                     |       |                      |     | Witnessed bullying of other staff or colleagues |      |                     |      |                      |     |
|----------------|------------------------|------|---------------------|-------|----------------------|-----|-------------------------------------------------|------|---------------------|------|----------------------|-----|
|                | No                     |      | Yes, to some degree |       | Yes, weekly or daily |     | No                                              |      | Yes, to some degree |      | Yes, weekly or daily |     |
|                | n                      | %    | n                   | %     | n                    | %   | n                                               | %    | n                   | %    | n                    | %   |
| <b>Overall</b> | 1022                   | 62.8 | 606                 | 37.2  | 40                   | 2.5 | 535                                             | 32.5 | 1109                | 67.5 | 78                   | 4.7 |
| Females        | 392                    | 60.1 | 260                 | 39.9* | 17                   | 2.6 | 199                                             | 30.4 | 455                 | 69.6 | 34                   | 5.2 |
| Males          | 583                    | 67.7 | 278                 | 32.3* | 21                   | 2.4 | 299                                             | 34.8 | 561                 | 65.2 | 40                   | 4.7 |

\*p<0.001

Note: totals for each block differ because of missing data

**Associations with bullying, workplace demands, peer and non-clinical manager support**

Non-parametric Spearman's correlations revealed significant associations between the three HSE sub-scales, with levels of workplace demands increasing with decreasing levels of peer and managerial support (all correlations >0.28). There was a strong association between being exposed to higher workplace demands and increasing overall NAQ-r and NAQ-r sub-scale scores. Low levels of peer-support were also strongly associated with higher overall NAQ-r and person-related bullying

scores. Similarly, high levels of workplace demands were associated with higher levels of work-related bullying. Witnessing and self-reporting bullying were also associated with high workplace demands, low levels of peer support and low levels of managerial support as detailed in Table 3.

**Table 3: Correlations between bullying measures and levels of workplace demands, peer and managerial support**

| Correlations<br>(Pearson correlation)            | Level of workplace demands | Level of peer support | Level of non-clinical managers' support |
|--------------------------------------------------|----------------------------|-----------------------|-----------------------------------------|
| NAQ-r score                                      | 0.464**                    | -0.574**              | -0.463**                                |
| Physically intimidating bullying sub-scale score | 0.246**                    | -0.319**              | -0.214**                                |
| Person-related bullying sub-scale score          | 0.284**                    | -0.565**              | -0.408**                                |
| Work-related bullying sub-scale score            | 0.608**                    | -0.491**              | -0.464**                                |
| Frequency of witnessing bullying                 | 0.229**                    | -0.315**              | -0.253**                                |
| Frequency of self-reporting as bullied           | 0.379**                    | -0.461**              | -0.379**                                |

\*\*All correlations are statistically significant at  $p < 0.001$

### Perpetrators and reporting of bullying behaviour

Of the 606 respondents who self-reported as bullied, other senior medical or dental staff were the most commonly cited perpetrators (52.5%) followed by non-clinical managers (31.8%) and clinical leaders (24.9%). The largest share of respondents reported that perpetrators were mainly male (36.8%) followed by those reporting equal numbers of male and female (35.5%).

30.4% ( $n=182$ ) of those who self-reported as bullied formally reported the behaviour experienced. Of the 415 who did not report it, 407 provided reasons why. Table 1 details the most common reasons for not reporting. Notably, 43.5% felt that they would not be supported and 42% felt that reporting would make the situation worse.

**Table 1: Summary of reasons for not reporting bullying behavior**

| Why did you not report this behaviour?*                                           | n   | %    |
|-----------------------------------------------------------------------------------|-----|------|
| I was concerned that reporting the issue would make the situation worse           | 171 | 42.0 |
| I did not know who to report the issue to                                         | 45  | 11.1 |
| I felt I would not be supported if I reported the issue                           | 177 | 43.5 |
| I was concerned about the impact that reporting the issue would have on my career | 112 | 27.5 |
| The behaviour stopped and has not recurred                                        | 26  | 6.4  |
| The person I would normally report the issue to is the perpetrator                | 115 | 28.3 |
| Other (please specify)                                                            | 127 | 31.2 |

\*respondents could select more than one reason

Explanations in the 'other' section expressed choosing not to report due to the behaviours being normalised: *"I have come to accept this as the culture of the institution I feel I cannot trust the people who I could report"*. Others noted that the behaviour was something that they accepted as simply part of the job *"[aggressive] behaviour from upset parents has always been part of my job. It makes me feel shaken and I generally would have a cup of tea with a colleague afterwards. Never considered a formal report"*. Some simply stated that *"I have more important things to worry about"*.

Of the 182 who reported their bullying experience, 30.8% noted that the issue was not addressed and the behaviour continued, while 20.9% stated that the issue was addressed but not resolved and the behaviour continued. 'Other' outcomes (28.6%) included the issue being currently under review as well as people noting either a dismissal of the reporting *"I mentioned to head of department and he said, 'yes they can be difficult sometimes' ""* as well as extreme consequences such as resigning or

1  
2  
3 changing roles “[eventually] I resigned and moved to be as far away from possible from the person.  
4 Restructuring later occurred and that person has now left. The service has been traumatised and is  
5 still healing from his 2 years of reign”.

### 8 **Consequences of bullying on professional and personal lives**

9 The effects of bullying, as reported by those who self-identified as having been bullied and chose to  
10 leave comments (n=563), were many and varied with ‘moderate’ consequences the most frequently  
11 reported. Respondents described feeling disillusioned, isolated, fearful, and lacking in trust. Others  
12 detailed the significant personal and professional costs of bullying including depressive episodes and  
13 feelings of burnout. Some detailed feelings of distress and upset when their stress and frustration  
14 spilled over from work into their interactions with partners or children. Thirty one comments  
15 described bullying as significantly circumscribing their ability to innovate or improve clinical service  
16 delivery due to poor communication and a tendency to resort to defensive medical practice. Some  
17 felt that this ultimately affected the timeliness and quality of patient care: “[it] makes you reluctant  
18 to engage a second time to discuss patient management. A delay in or wrong decision to discharge is  
19 then made. Over-monitoring by a non-clinical [manager] then has you working defensively. Add  
20 abuse from patients for not meeting expectations and weekly passive aggressive reminders that  
21 targets are not being met...”. A full summary of themes and illustrative comments is detailed in  
22 Table 5.  
23  
24  
25  
26  
27  
28  
29  
30  
31  
32  
33  
34  
35  
36  
37  
38  
39  
40  
41  
42  
43  
44  
45  
46  
47  
48  
49  
50  
51  
52  
53  
54  
55  
56  
57  
58  
59  
60

**Table 5: Summary of themes and illustrative comments**

| <b>Themes:</b><br>(NB: comments could reference multiple themes simultaneously)                                                                                                                                                                                                                                                                                                                                                                                                                                                                                                                                                                                                                                                                                                                                                                                                                                                                                                                                               | <b>Illustrative comments:</b>                                                                                                                                                                                                                                                                                                                                                                                                                                                                                                                                                                                                                                                                                                                                                                                                                                                                                                                                                                                                                                                                                                                                                                                                                                                                                                                                                                                                                                                                                                                                                                                                                                                                                                                                                                        |
|-------------------------------------------------------------------------------------------------------------------------------------------------------------------------------------------------------------------------------------------------------------------------------------------------------------------------------------------------------------------------------------------------------------------------------------------------------------------------------------------------------------------------------------------------------------------------------------------------------------------------------------------------------------------------------------------------------------------------------------------------------------------------------------------------------------------------------------------------------------------------------------------------------------------------------------------------------------------------------------------------------------------------------|------------------------------------------------------------------------------------------------------------------------------------------------------------------------------------------------------------------------------------------------------------------------------------------------------------------------------------------------------------------------------------------------------------------------------------------------------------------------------------------------------------------------------------------------------------------------------------------------------------------------------------------------------------------------------------------------------------------------------------------------------------------------------------------------------------------------------------------------------------------------------------------------------------------------------------------------------------------------------------------------------------------------------------------------------------------------------------------------------------------------------------------------------------------------------------------------------------------------------------------------------------------------------------------------------------------------------------------------------------------------------------------------------------------------------------------------------------------------------------------------------------------------------------------------------------------------------------------------------------------------------------------------------------------------------------------------------------------------------------------------------------------------------------------------------|
| <b>Minor consequence/coping</b> <ul style="list-style-type: none"> <li>• Dealt with bully personally (n=3)</li> <li>• Coping by acquiescence, retreat, keeping head down (n=21)</li> <li>• Little effect or no significant impact (n=49)</li> </ul>                                                                                                                                                                                                                                                                                                                                                                                                                                                                                                                                                                                                                                                                                                                                                                           | <p>“Recognise the behaviour and dismiss it and remain calm... Does not affect me and I do not try to defend against allegations made. Have had many years of practice.”</p>                                                                                                                                                                                                                                                                                                                                                                                                                                                                                                                                                                                                                                                                                                                                                                                                                                                                                                                                                                                                                                                                                                                                                                                                                                                                                                                                                                                                                                                                                                                                                                                                                          |
| <b>Moderate consequences:</b> <ul style="list-style-type: none"> <li>• Defamation, character attacks, unfounded gossip or rumours (n=12)</li> <li>• Not wanting to go to work (n=20)</li> <li>• Undermining of abilities or professional standing (n=20)</li> <li>• Feeling unappreciated and/or unacknowledged (n=20)</li> <li>• Affected sleep (n=26)</li> <li>• Reduced hours and level of involvement (n=28)</li> <li>• Impeded ability to innovate or improve clinically (n=31)</li> <li>• Anger, irritation, frustration (n=42)</li> <li>• Loss of self-confidence and faith in abilities (n=42)</li> <li>• Affected personal life or home dynamic (n=49)</li> <li>• Compromised ability to work or perform to usual standards (n=51)</li> <li>• Negative work dynamic resulted (n=52)</li> <li>• Affected collegiality and willingness to collaborate (n=59)</li> <li>• Anxiety, loss of trust, faith in system, feeling isolated (n=66)</li> <li>• Disillusionment loss of enjoyment or love of job (n=76)</li> </ul> | <p>“For the first time in 19 years working as a doctor, I dislike coming to work. I am anxious and sleep poorly. I am struggling in my personal relationships because I feel like I should be able to cope but don't seem to be able to...I often feel unsafe now at work, and I worry that my experience here will have a negative impact on future positions I apply for. I am considering leaving the field of medicine because of my experience at this particular DHB.”</p> <p>“As the person doesn't speak, communicate or interact with [me] and hasn't for 2.5 years. I am at a loss as to how to fulfil my role...[I'm ] basically guessing what to do. Plus [I] have been undermined and humiliated and disenfranchised and the staff I give clinical guidance to know it. I have lost confidence in myself and in my professional abilities.”</p> <p>“... Bullying wrecks a whole week. It leads to self-doubt and second guessing. It takes a long time to recover from. It is poorly recognised. It is difficult as an SMO to call out on bullying as it is a sign of weakness. Therefore, many of us put up with it especially in a system where we are overworked with unrealistic schedules and no hope of making an improvement.”</p> <p>“You pull back and do the bare minimum to keep a service running. Bringing the behaviour to the attention of managers further up the pecking order has made no difference. Patient health is at risk.”</p> <p>Professionally it has affected my enjoyment of my job and I am considering moving to another DHB as I feel that I am so intimidated at times that I am unable to do my job to the best of my abilities. At times it is intolerable. The behaviour has caused me stress which has spilled over into my personal life too.</p> |
| <b>Significant consequences</b> <ul style="list-style-type: none"> <li>• Taken leave (n=7)</li> <li>• Burnout, mental health issues, depression (n=25)</li> <li>• Significant stress (n=58)</li> <li>• Contemplating leaving, early retirement, quitting medicine (n=64)</li> </ul>                                                                                                                                                                                                                                                                                                                                                                                                                                                                                                                                                                                                                                                                                                                                           | <p>“I fear going to work. I feel as if I am being watched the whole time. I feel as though it doesn't matter how good my clinical work is, that my manager and [clinical director] will find a way to put a negative spin on it... I have lost confidence in myself as a doctor and a person. I feel disempowered... I am very anxious about work. This affects my sleep, which makes me worry more... I find it harder to trust people in general, and am more defensive...I am less patient with my children, as I feel so stressed. It feels like being trapped in an abusive relationship... I often dream of leaving. I often feel I have wasted my life, investing so much of myself in my work, when it is not valued by my seniors, even though patients value what I do. ...I see patient care compromised, and the quality of the service being eroded. ...I feel ethically compromised every day”</p>                                                                                                                                                                                                                                                                                                                                                                                                                                                                                                                                                                                                                                                                                                                                                                                                                                                                                     |



## DISCUSSION

This study reports the first multicentre multispecialty study into the prevalence of workplace bullying in a senior medical workforce across an entire country, including the sources of such behaviour and rates of and barriers to reporting. It extends existing research by examining associations between bullying prevalence and perceptions of workload and peer and managerial support. It addresses the extensive methodological debate about how to measure workplace bullying, including both 'inside', or self-report measures and 'outside', or peer report methods[23]. It also combines quantitative and qualitative data, with analysis of the latter, describing personal and professional impacts of bullying, further adding to the strengths of this study. Other approaches, such as focus group discussions, or critical incident analysis would not be feasible on a large scale.

Over a third of this sample of senior doctors and dentists working in New Zealand's public health system are regularly exposed to a wide range of negative behaviours at work. Over a third self-report as being bullied and over two thirds report witnessing bullying of colleagues. The results overall suggest exposure to some degree of negative behaviour is ubiquitous in this senior medical workforce, with work-related bullying especially common.

The strong associations between decreasing peer and managerial support, increasing workplace demands and increasing frequencies of all measures of bullying are of note. These findings contribute to the literature which views bullying as a phenomenon with multiple antecedents, and emphasise the impact of stressful workplaces with poor organisational cultures where bullying may be normalised as a coping strategy[6,9,24]. Conversely, these associations suggest that having good relationships with peers and those in managerial positions might act as a buffer against bullying. It is also worth noting that even in workplaces with high stress and demands, bullying is not always an inevitable consequence[12].

The application of the NAQ-r enables both an assessment of the types of behaviours most commonly experienced as well as the frequency of the bullying experienced in a manner that provides for international comparisons as well as highlighting specific issues requiring action. Overall NAQ-r prevalence in this study is higher than the rates of bullying reported in Australasian studies applying the same methodology [14,25] The NAQ-r mean score and 37% self-report prevalence scores were also higher than in other international studies using the NAQ-r such as Carter, et al. [24]. The difference in the rates of self-reported (37%) and witnessed bullying rates (67.5%) is consistent with trends reported in other studies [3,26]. This differential may be ascribed to a reluctance by individuals to self-identify as a 'victim'[27], but it is equally possible that some respondents may witness the same person being bullied thus potentially overreporting bullying prevalence.

The statistically significant differences in NAQ-r mean scores and self-report bullying rates by age, medical specialty, and for some of the sub-scale scores, gender, ethnicity, medical specialty, and country of medical training, are concerning. They suggest that while bullying is experienced across the board, there are pockets of higher prevalence of certain behaviours for specific groups of individuals that warrant further investigation and organisational action. For example, the finding that international medical graduates are more likely to experience person-related bullying should be of concern given New Zealand's high reliance on IMGs[28]

1  
2  
3 The findings from this study confirm the impression given by the existing literature that certain  
4 medical specialties experience higher prevalence of bullying than others. The high self-report  
5 prevalence (47.9%) and NAQ-r scores for specialists in emergency medicine is, methodological  
6 differences notwithstanding, higher than the 34.5% bullying prevalence reported by the Australasian  
7 College of Emergency Medicine which surveyed all fellows of the college, including trainees[29]. At  
8 the time of both surveys, many emergency departments around the country were reporting higher  
9 than usual demands on their services over the winter period[30]. In light of broader workforce  
10 pressures including poor resourcing, staffing shortages and high levels of burnout in this  
11 workforce[31], it is not hard to conceive that negative interpersonal interactions, particularly if they  
12 are already normalised in the workplace, may escalate as a way to 'get things done' in times of  
13 significant stress[32].  
14  
15

16  
17 Also consistent with studies was the finding that other senior medical staff were the main  
18 perpetrators of self-reported and witnessed bullying behaviour (52.5% overall). These findings  
19 highlight the significant problem of peer-to-peer bullying in this section of the medical workforce.  
20 Little research to date has revealed the extent to which other senior medical and dental staff  
21 bullying each other and this finding is, while not entirely unexpected, of great concern.  
22  
23

24 The low rates of reporting, largely due to the fear of exacerbating the situation or not receiving  
25 support, suggests that considerable effort is still required to facilitate better reporting systems and  
26 procedures for handling bullying complaints. It is of further concern that, for the majority of those  
27 who did formally report bullying behaviour, the issue was not addressed and the behaviour  
28 continued. This suggests that despite the rhetoric, much work remains to be done to improve the  
29 outcomes for those who do choose to report.  
30  
31

32  
33 These findings have considerable relevance for those charged with improving the working conditions  
34 of this vital component of the medical workforce. Previous research has revealed a correlation with  
35 sickness absence, although the direction of causation is unclear[33]. A Finnish study found that those  
36 who experienced bullying were more likely to use sedatives and hypnotics, with potential  
37 consequences for their performance[34]. The same study found greater levels of stress in those who  
38 were the victims of bullying and those who observed it, compared with those in workplaces without  
39 bullying. However, they also have implications for those concerned for the quality of patient  
40 care[35]. As explicated in grim detail in the qualitative data, bullying has far-reaching consequences  
41 that do not stop at the individual. Working in an environment where bullying is both witnessed and  
42 experienced has clear consequences for the manner in which medical teams are able to  
43 function[16,36] and deliver the services upon which public health systems depend[2,37].  
44  
45  
46

47 The results of this survey indicate a need for a comprehensive series of interventions not only to  
48 address problematic behaviours but to consider the broader implications of growing workloads,  
49 under-resourcing and understaffing for the health and wellbeing of this medical workforce and their  
50 patients.  
51  
52

53 It is possible that the topic of the survey may have motivated those who have experienced bullying  
54 to respond, resulting in responder bias. Nevertheless, the primary author received a number of  
55 emails from individuals who self-identified as bullied who chose not to participate in the study for a  
56  
57  
58  
59

1  
2  
3 variety of reasons including fear of identification. Thus, research in this area may contradict the  
4 common conception that responder bias favours those affected by the issue at hand. Regardless,  
5 given the moderate response rate, this study cannot be presumed to be representative of the views  
6 or experiences of the senior medical workforce in New Zealand as a whole. The cross-sectional  
7 design of the survey also means that causal relationships cannot be inferred and any discussion of  
8 the associations between demographic and other factors is not meant to imply causality or direction.  
9

- 10  
11 a. Contributorship statement: The research was designed and conducted by Dr Chambers,  
12 statistical analysis was performed by Prof Frampton and analysis and contributions were  
13 received from Prof Barclay and Prof McKee. All authors edited and revised the final  
14 submission and signed off on the final version.  
15  
16 b. Competing interests: There are no competing interests  
17  
18 c. Funding: There are no funders to report for this submission  
19  
20 d. Data sharing statement: no additional data available  
21  
22 e. Acknowledgements: Thanks to members of the ASMS who participated in this research.  
23  
24  
25  
26  
27

## 28 REFERENCES

- 29 1. Jamieson J, Mitchell R, Le Fevre J, Perry A. Bullying and harassment of trainees: An unspoken  
30 emergency? *Emergency Medicine Australasia* 2015;**27**(5):464-67 doi: 10.1111/1742-  
31 6723.12465.  
32 2. Paice E, Smith D. Bullying of trainee doctors is a patient safety issue. *The Clinical Teacher*  
33 2009;**6**(1):13-17 doi: 10.1111/j.1743-498X.2008.00251.x.  
34 3. Quine L. Workplace bullying in nhs community trust: Staff questionnaire survey. *Bmj*  
35 1999;**318**(7178):228-32.  
36 4. Hogh A, Conway PM, Grynderup MB, et al. Negative acts at work as potential bullying behavior  
37 and depression: Examining the direction of the association in a 2-year follow-up study.  
38 *Journal of occupational and environmental medicine* 2016;**58**(3):e72-9 doi:  
39 10.1097/jom.0000000000000622.  
40 5. Kivimäki M, Virtanen M, Vartiainen M, Elovainio M, Vahtera J, Keltikangas-Järvinen L. Workplace  
41 bullying and the risk of cardiovascular disease and depression. *Occupational and*  
42 *environmental medicine* 2003;**60**(10):779-83.  
43 6. Einarsen S. Harassment and bullying at work: A review of the scandinavian approach. *Aggression*  
44 *and violent behavior* 2000;**5**(4):379-401.  
45 7. Einarsen S, Raknes BI. Harassment in the workplace and the victimization of men. *Violence and*  
46 *victims* 1997;**12**(3):247.  
47 8. Matthiesen SB, Einarsen S. Bullying in the workplace: Definition, prevalence, antecedents and  
48 consequences. *International Journal of Organization Theory and Behavior* 2010;**13**(2):202.  
49 9. Salin D. Ways of explaining workplace bullying: A review of enabling, motivating and precipitating  
50 structures and processes in the work environment. *Human Relations* 2003;**56**(10):1213-32  
51 doi: 10.1177/00187267035610003.  
52 10. Fink-Samnick E. The new age of bullying and violence in health care: Part 2: Advancing  
53 professional education, practice culture, and advocacy. *Professional case management*  
54 2016;**21**(3):114-26; quiz E1-2 doi: 10.1097/ncm.0000000000000146.  
55  
56  
57  
58  
59

11. Hoel H, Salin D. 10 organisational antecedents of workplace bullying. *Bullying and emotional abuse in the workplace* 2003:203.
12. Bradley V, Liddle S, Shaw R, et al. Sticks and stones: Investigating rude, dismissive and aggressive communication between doctors. *Clinical medicine* 2015;**15**(6):541-45.
13. Knowles R, Szoke H, Campbell G, et al. Expert advisory group on discrimination, bullying and sexual harassment advising the royal australasian college of surgeons Report to the Royal Australasian College of Surgeons, 2015.
14. Ling M, Young CJ, Shepherd HL, Mak C, Saw RP. Workplace bullying in surgery. *World J Surg* 2016;**40**(11):2560-66 doi: 10.1007/s00268-016-3642-7.
15. Venkatesh B, Corke C, Raper R, et al. Prevalence of bullying, discrimination and sexual harassment among trainees and fellows of the college of intensive care medicine of australia and new zealand. *Critical care and resuscitation* 2016;**18**(4):230.
16. Shabazz T, Parry-Smith W, Oates S, Henderson S, Mountfield J. Consultants as victims of bullying and undermining: A survey of royal college of obstetricians and gynaecologists consultant experiences. *BMJ Open* 2016;**6**(6) doi: 10.1136/bmjopen-2016-011462.
17. Einarsen S, Hoel H, Notelaers G. Measuring exposure to bullying and harassment at work: Validity, factor structure and psychometric properties of the negative acts questionnaire-revised. *Work & Stress* 2009;**23**(1):24-44.
18. Einarsen S, Hoel H, Notelaers G. *Measuring exposure to bullying and harassment at work: Validity, factor structure and psychometric properties of the negative acts questionnaire-revised*, 2009.
19. Einarsen S, Skogstad A. Bullying at work: Epidemiological findings in public and private organizations. *European Journal of Work and Organizational Psychology* 1996;**5**(2):185-201 doi: 10.1080/13594329608414854.
20. Leymann H. Mobbing and psychological terror at workplaces. *Violence Vict* 1990;**5**(2):119-26.
21. HSE. Health and safety executive management standards tool. Secondary Health and safety executive management standards tool 2017. <http://www.hse.gov.uk/stress/standards/index.htm>.
22. Charmaz K. Grounded theory as an emergent method. In: Hesse-Biber SN, Leavy P, eds. *Handbook of emergent methods*. New York: The Guilford Press, 2008:155-72.
23. Cowie H, Naylor P, Rivers I, Smith PK, Pereira B. Measuring workplace bullying. *Aggression and Violent Behavior* 2002;**7**(1):33-51 doi: [https://doi.org/10.1016/S1359-1789\(00\)00034-3](https://doi.org/10.1016/S1359-1789(00)00034-3).
24. Carter M, Thompson N, Crampton P, et al. Workplace bullying in the uk nhs: A questionnaire and interview study on prevalence, impact and barriers to reporting. *BMJ open* 2013;**3**(6):e002628.
25. Bentley T, Catley B, Cooper-Thomas H, Gardner D, O'Driscoll M, Trenberth L. Understanding stress and bullying in new zealand workplaces: Final report to oh&s steering committee. Wellington, New Zealand 2009.
26. Steadman L, Quine L, Jack K, Felix DH, Waumsley J. Experience of workplace bullying behaviours in postgraduate hospital dentists: Questionnaire survey. *Br Dent J* 2009;**207**(8):379-80 doi: 10.1038/sj.bdj.2009.901.
27. Mikkelsen EG, Einarsen S. Bullying in danish work-life: Prevalence and health correlates. *European Journal of Work and Organizational Psychology* 2001;**10**:393-413 doi: <http://dx.doi.org/10.1080/13594320143000816s>.
28. Zealand MCoN. The new zealand medical workforce in 2013 and 2014. Wellington, New Zealand: Medical Council of New Zealand, 2016.
29. ACEM. Acem membership consultation paper on discrimination, bullying and sexual harassment: Australasian College for Emergency Medicine 2017.
30. Weber A. Winter ills fill hospitals: 'We simply haven't got the space'. *Secondary Winter ills fill hospitals: 'We simply haven't got the space'* 2017.

<http://www.radionz.co.nz/news/national/335368/winter-ills-fill-hospitals-we-simply-havent-got-the-space>.

31. Chambers CN, Frampton CM, Barclay M, McKee M. Burnout prevalence in new zealand's public hospital senior medical workforce: A cross-sectional mixed methods study. *BMJ Open* 2016;**6**(11):e013947 doi: 10.1136/bmjopen-2016-013947.
32. Bentley TA, Catley B, Cooper-Thomas H, et al. Perceptions of workplace bullying in the new zealand travel industry: Prevalence and management strategies. *Tourism Management* 2012;**33**(2):351-60 doi: <http://dx.doi.org/10.1016/j.tourman.2011.04.004>.
33. Kivimäki M, Elovainio M, Vahtera J. Workplace bullying and sickness absence in hospital staff. *Occupational and Environmental Medicine* 2000;**57**(10):656-60 doi: 10.1136/oem.57.10.656.
34. Vartia MAL. Consequences of workplace bullying with respect to the well-being of its targets and the observers of bullying. *Scandinavian Journal of Work, Environment & Health* 2001;**27**(1):63-69.
35. Rosenstein AH, O'Daniel M. Impact and implications of disruptive behavior in the perioperative arena. *Journal of the American College of Surgeons* 2006;**203**(1):96-105 doi: <https://doi.org/10.1016/j.jamcollsurg.2006.03.027>.
36. Roche M, Diers D, Duffield C, Catling-Paull C. Violence toward nurses, the work environment, and patient outcomes. *Journal of Nursing Scholarship* 2010;**42**(1):13-22 doi: 10.1111/j.1547-5069.2009.01321.x.
37. Wild JRL, Ferguson HJM, McDermott FD, Hornby ST, Gokani VJ. Undermining and bullying in surgical training: A review and recommendations by the association of surgeons in training. *International Journal of Surgery*; **23**:S5-S9 doi: 10.1016/j.ijso.2015.09.017.

#### Figure legends:

Figure 1 and Figure 2

-  Yes, weekly or daily
-  Yes, to some degree
-  Never



Figure 1: Frequency and percentage of respondents experiencing negative behaviours over the past 6 months (NAQ-r)  
 Sub-scale questions: 1= Work-related bullying 2=person-related bullying 3=physically intimidating bullying.  
 ^ = collapsed frequencies of 'now and then' and monthly  
 \* behaviours with significant variance by age group  
 # behaviours with a significantly higher prevalence for female respondents compared to male respondents  
 \$ behaviours with significant variance by ethnicity  
 @ behaviours with significantly higher prevalence for IMG respondents compared to NZ-trained respondents  
 ∞behaviours with significant variance by medical specialty

85x41mm (300 x 300 DPI)

1  
2  
3  
4  
5  
6  
7  
8  
9  
10  
11  
12  
13  
14  
15  
16  
17  
18  
19  
20  
21  
22  
23  
24  
25  
26  
27  
28  
29  
30  
31  
32  
33  
34  
35  
36  
37  
38  
39  
40  
41  
42  
43  
44  
45  
46  
47  
48  
49  
50  
51  
52  
53  
54  
55  
56  
57  
58  
59  
60

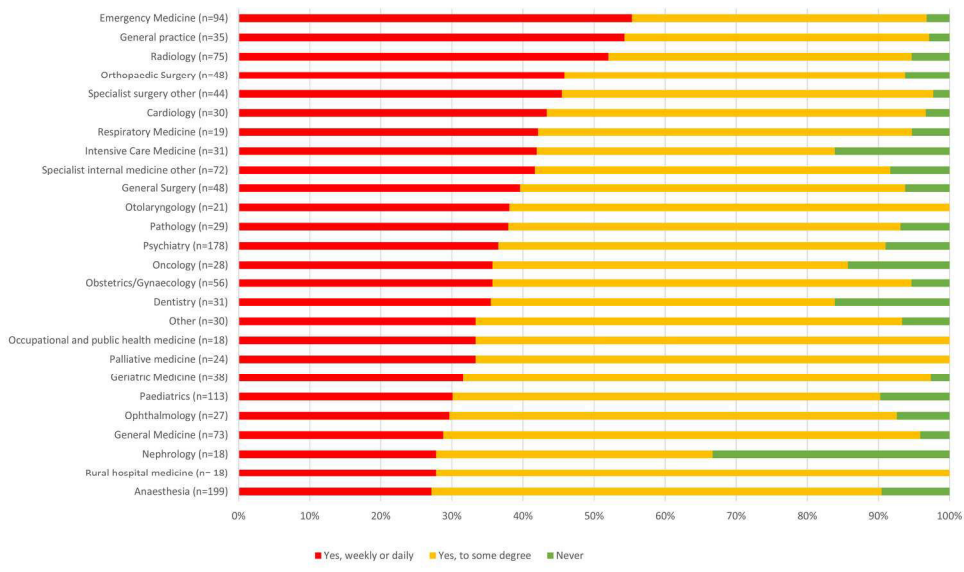

Figure 2: Prevalence of experiencing at least one negative behaviour (NAQ-r) by medical specialty.

103x61mm (600 x 600 DPI)

Review only

## Appendix 1

| Grouped specialties:                    | Specialties included:                 | n   |
|-----------------------------------------|---------------------------------------|-----|
| Psychiatry                              | Addiction medicine                    | 6   |
|                                         | Psychiatry                            | 162 |
|                                         | Psychogeriatrics                      | 10  |
| Specialist surgery 'other'              | Cardiothoracic surgery                | 5   |
|                                         | Neurosurgery                          | 4   |
|                                         | Oral & Maxillofacial Surgery          | 3   |
|                                         | Paediatric surgery                    | 4   |
|                                         | Plastic & reconstructive surgery      | 13  |
|                                         | Vascular surgery                      | 10  |
|                                         | Urology                               | 5   |
| Other                                   | Clinical Genetics                     | 3   |
|                                         | Medical Administration                | 3   |
|                                         | Other incl. requests for anonymity    | 20  |
|                                         | Rehabilitation Medicine               | 4   |
| Specialist internal medicine 'other'    | Dermatology                           | 6   |
|                                         | Endocrinology                         | 5   |
|                                         | Gastroenterology                      | 12  |
|                                         | Haematology                           | 15  |
|                                         | Immunology                            | 2   |
|                                         | Infectious Diseases Medicine          | 5   |
|                                         | Neurology                             | 12  |
|                                         | Obstetric Medicine                    | 4   |
|                                         | Rheumatology                          | 11  |
| Paediatrics                             | Developmental Paediatrics             | 2   |
|                                         | Neonatology                           | 10  |
|                                         | Paediatric other                      | 15  |
|                                         | Paediatric oncology                   | 6   |
|                                         | Paediatric haematology                | 1   |
|                                         | Paediatric cardiology                 | 3   |
|                                         | Paediatrics                           | 76  |
| General practice                        | General Practice                      | 21  |
|                                         | Family Planning & Reproductive Health | 4   |
|                                         | Accident & Medical Practice           | 2   |
|                                         | Sexual Health Medicine                | 8   |
| Oncology                                | Medical Oncology                      | 18  |
|                                         | Radiation Oncology                    | 10  |
| Occupational and public health medicine | Occupational Medicine                 | 3   |
|                                         | Public Health Medicine                | 15  |
| Anaesthesia                             | Anaesthesia                           | 191 |
|                                         | Pain Medicine                         | 8   |
| Palliative medicine                     | Paediatric palliative care            | 1   |
|                                         | Palliative Medicine                   | 23  |



1  
2  
3  
4  
5  
6  
7  
8  
9  
10  
11  
12  
13  
14  
15  
16  
17  
18  
19  
20  
21  
22  
23  
24  
25  
26  
27  
28  
29  
30  
31  
32  
33  
34  
35  
36  
37  
38  
39  
40  
41  
42  
43  
44  
45  
46  
47  
48  
49  
50  
51  
52  
53  
54  
55  
56  
57  
58  
59  
60



110x70mm (300 x 300 DPI)

view only

1  
2  
3  
4  
5  
6  
7  
8  
9  
10  
11  
12  
13  
14  
15  
16  
17  
18  
19  
20  
21  
22  
23  
24  
25  
26  
27  
28  
29  
30  
31  
32  
33  
34  
35  
36  
37  
38  
39  
40  
41  
42  
43  
44  
45  
46  
47  
48  
49  
50  
51  
52  
53  
54  
55  
56  
57  
58  
59  
60



113x73mm (300 x 300 DPI)

view only

1  
2  
3  
4  
5  
6  
7  
8  
9  
10  
11  
12  
13  
14  
15  
16  
17  
18  
19  
20  
21  
22  
23  
24  
25  
26  
27  
28  
29  
30  
31  
32  
33  
34  
35  
36  
37  
38  
39  
40  
41  
42  
43  
44  
45  
46

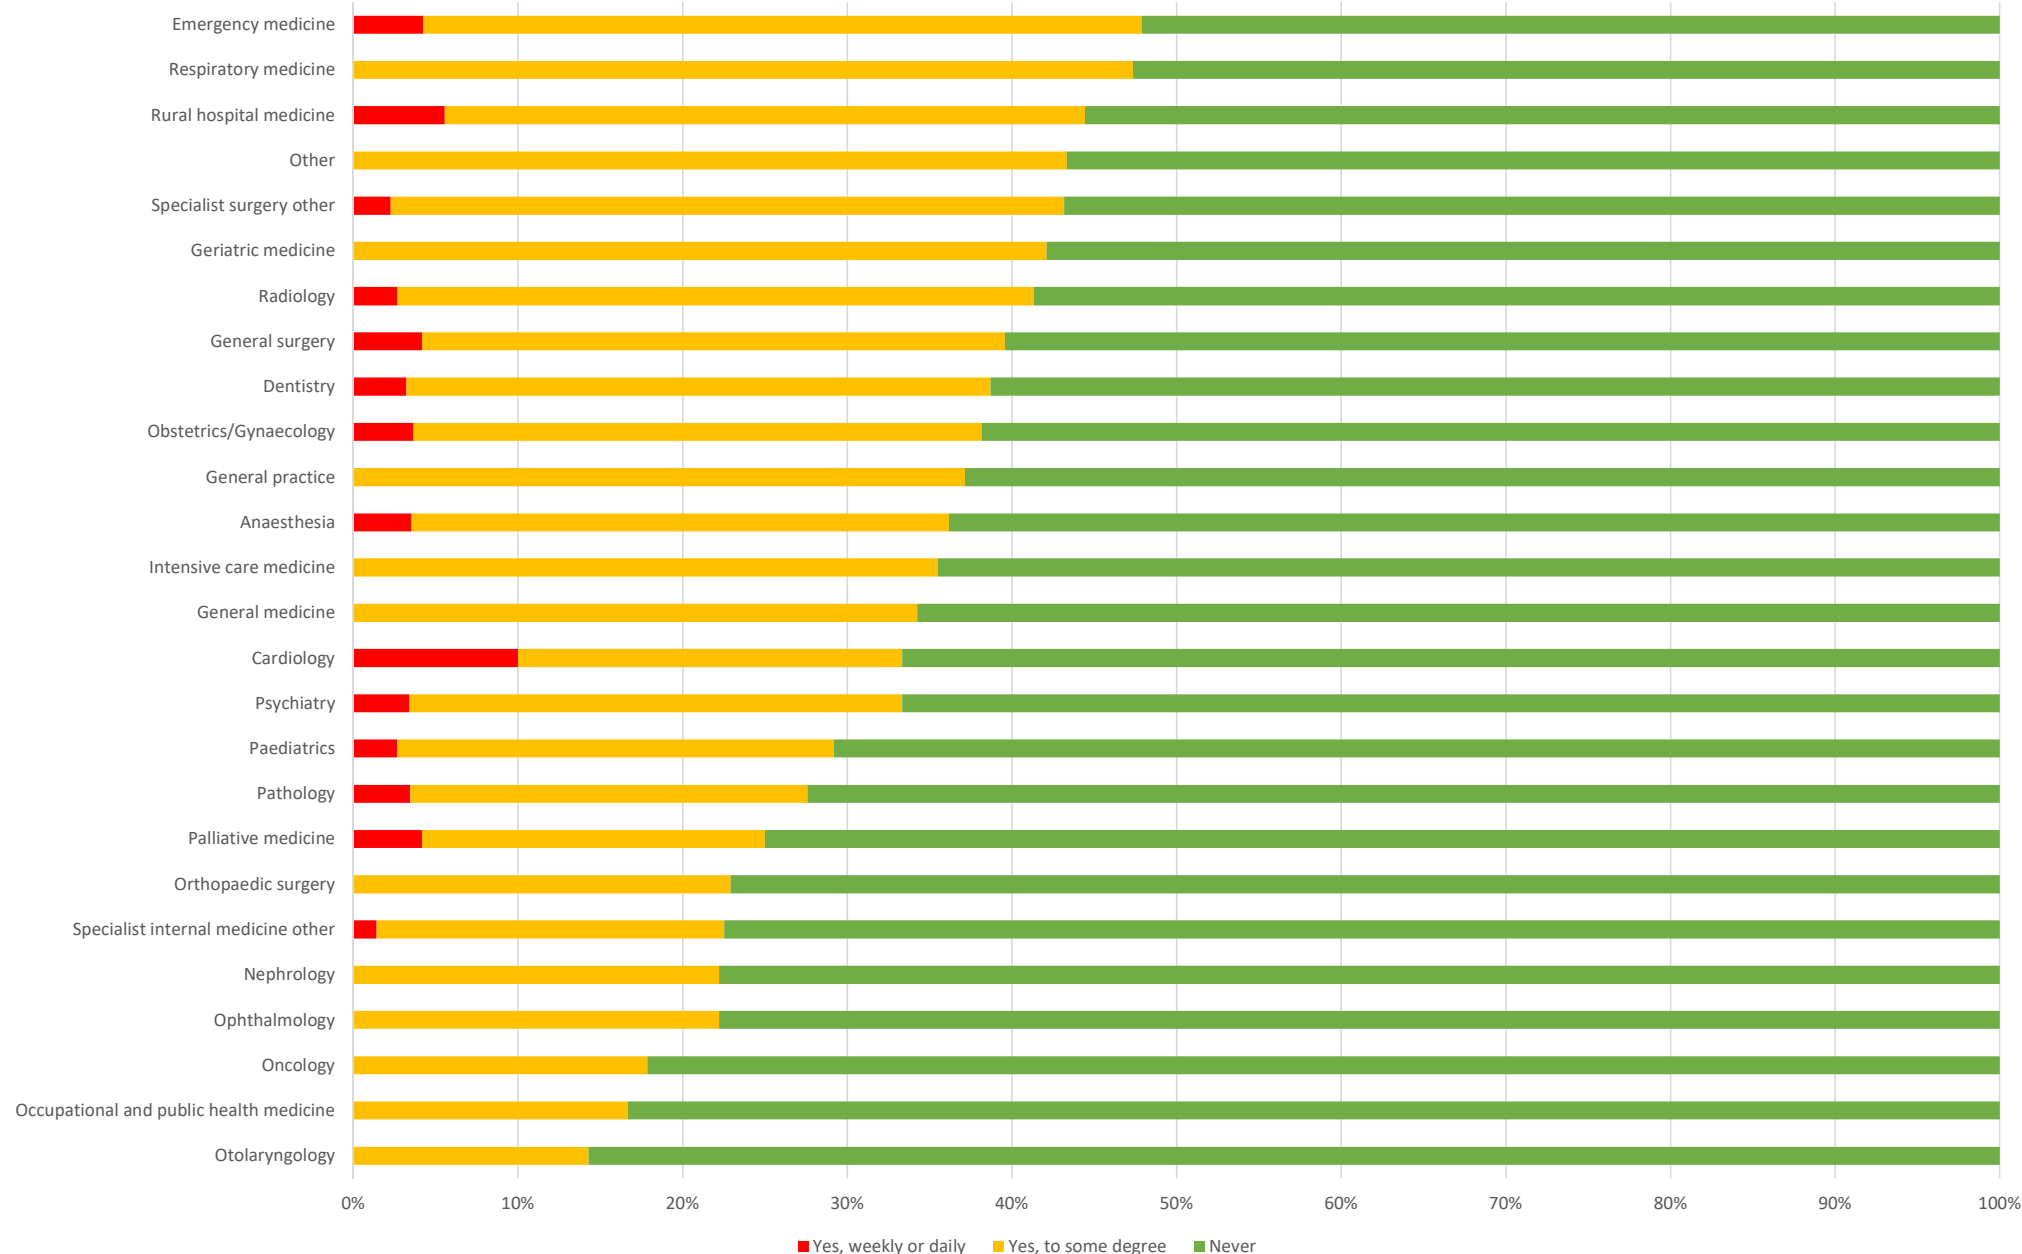

■ Yes, weekly or daily ■ Yes, to some degree ■ Never

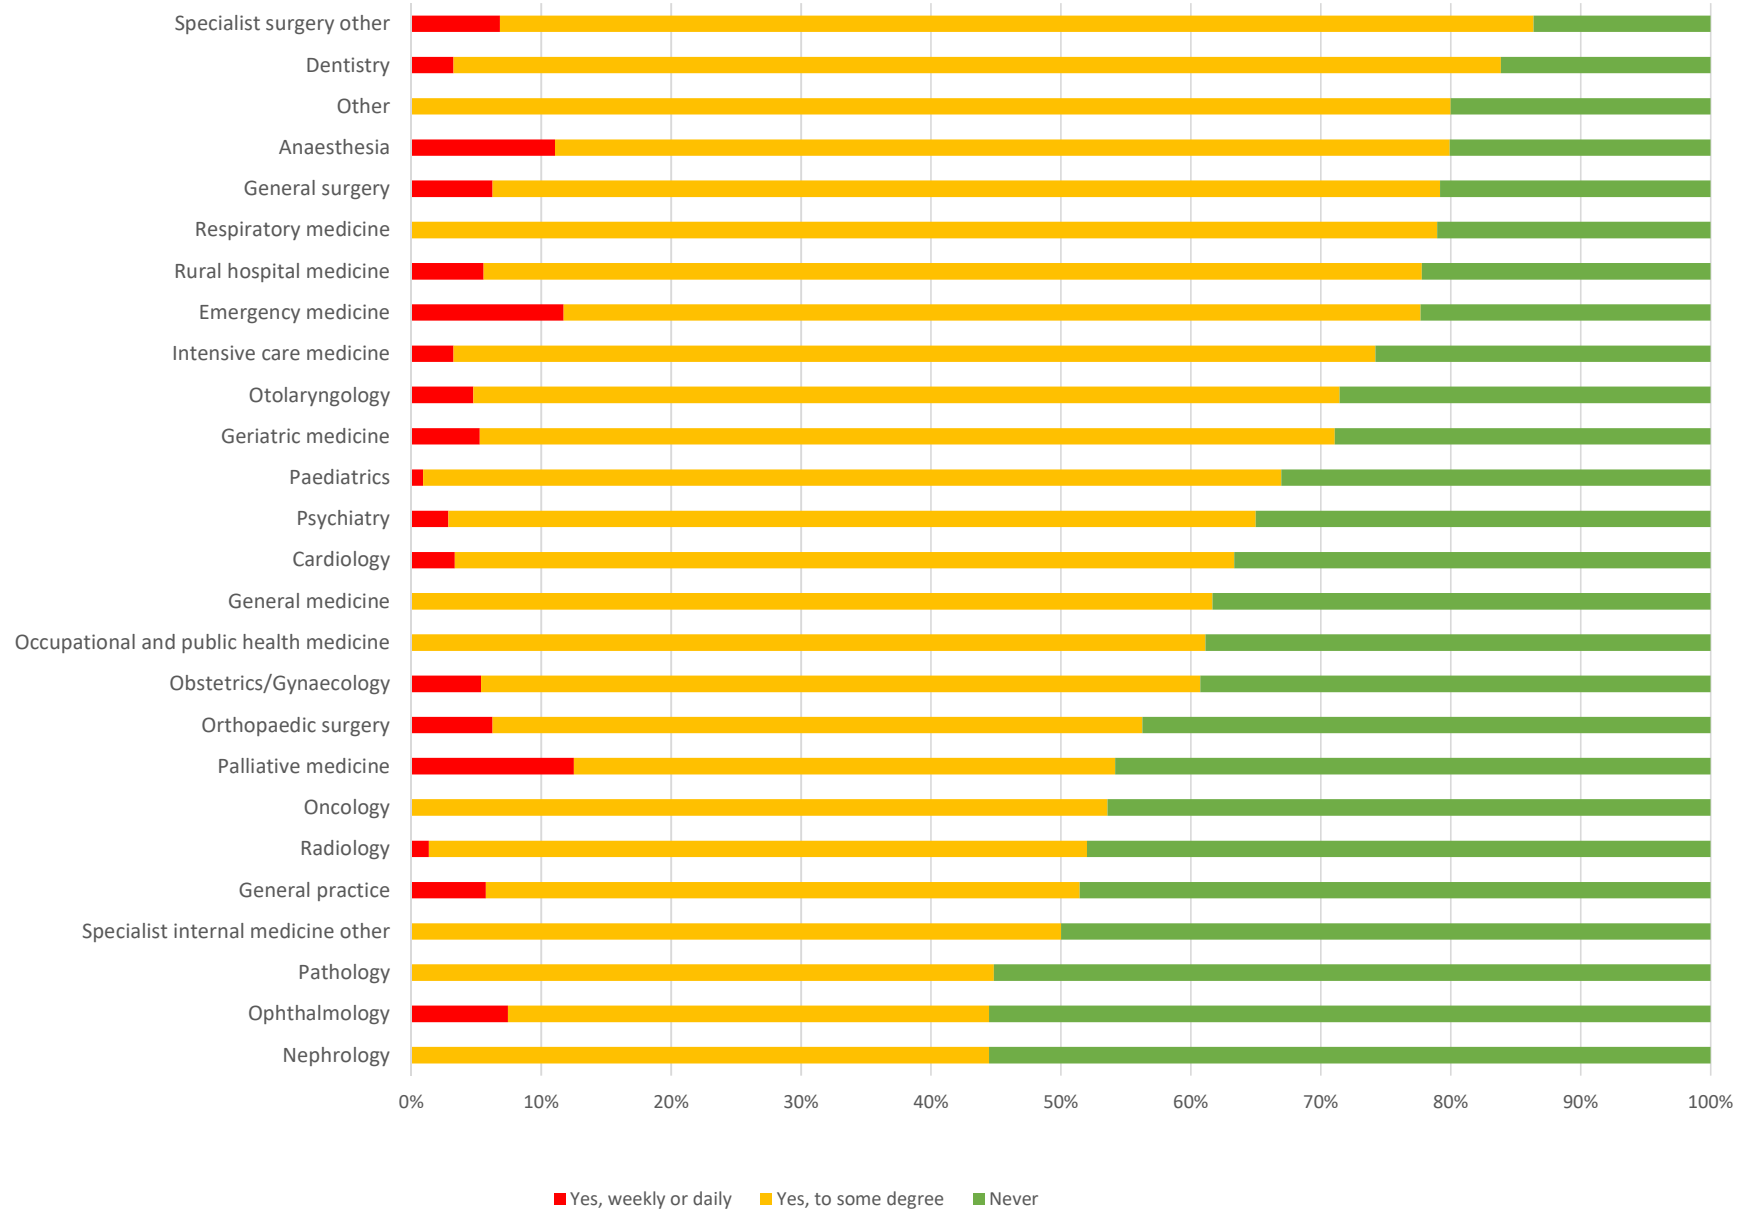

**STROBE 2007 (v4) Statement—Checklist of items that should be included in reports of *cross-sectional studies***

| Section/Topic                | Item # | Recommendation                                                                                                                                                                       | Reported on page # |
|------------------------------|--------|--------------------------------------------------------------------------------------------------------------------------------------------------------------------------------------|--------------------|
| <b>Title and abstract</b>    | 1      | (a) Indicate the study’s design with a commonly used term in the title or the abstract                                                                                               | 1                  |
|                              |        | (b) Provide in the abstract an informative and balanced summary of what was done and what was found                                                                                  | 2                  |
| <b>Introduction</b>          |        |                                                                                                                                                                                      |                    |
| Background/rationale         | 2      | Explain the scientific background and rationale for the investigation being reported                                                                                                 | 3                  |
| Objectives                   | 3      | State specific objectives, including any prespecified hypotheses                                                                                                                     | 1                  |
| <b>Methods</b>               |        |                                                                                                                                                                                      |                    |
| Study design                 | 4      | Present key elements of study design early in the paper                                                                                                                              | 4                  |
| Setting                      | 5      | Describe the setting, locations, and relevant dates, including periods of recruitment, exposure, follow-up, and data collection                                                      | 1,4                |
| Participants                 | 6      | (a) Give the eligibility criteria, and the sources and methods of selection of participants                                                                                          | 4                  |
| Variables                    | 7      | Clearly define all outcomes, exposures, predictors, potential confounders, and effect modifiers. Give diagnostic criteria, if applicable                                             | 4-5                |
| Data sources/<br>measurement | 8*     | For each variable of interest, give sources of data and details of methods of assessment (measurement). Describe comparability of assessment methods if there is more than one group | 4-5                |
| Bias                         | 9      | Describe any efforts to address potential sources of bias                                                                                                                            | 14-15              |
| Study size                   | 10     | Explain how the study size was arrived at                                                                                                                                            | 4                  |
| Quantitative variables       | 11     | Explain how quantitative variables were handled in the analyses. If applicable, describe which groupings were chosen and why                                                         | 4-5                |
| Statistical methods          | 12     | (a) Describe all statistical methods, including those used to control for confounding                                                                                                | 4-5                |
|                              |        | (b) Describe any methods used to examine subgroups and interactions                                                                                                                  | 4-5                |
|                              |        | (c) Explain how missing data were addressed                                                                                                                                          | 6                  |
|                              |        | (d) If applicable, describe analytical methods taking account of sampling strategy                                                                                                   |                    |
|                              |        | (e) Describe any sensitivity analyses                                                                                                                                                | 4-5                |
| <b>Results</b>               |        |                                                                                                                                                                                      |                    |

|                          |     |                                                                                                                                                                                                              |                          |
|--------------------------|-----|--------------------------------------------------------------------------------------------------------------------------------------------------------------------------------------------------------------|--------------------------|
| Participants             | 13* | (a) Report numbers of individuals at each stage of study—eg numbers potentially eligible, examined for eligibility, confirmed eligible, included in the study, completing follow-up, and analysed            | 6                        |
|                          |     | (b) Give reasons for non-participation at each stage                                                                                                                                                         | Throughout               |
|                          |     | (c) Consider use of a flow diagram                                                                                                                                                                           | n/a                      |
| Descriptive data         | 14* | (a) Give characteristics of study participants (eg demographic, clinical, social) and information on exposures and potential confounders                                                                     | 6-7                      |
|                          |     | (b) Indicate number of participants with missing data for each variable of interest                                                                                                                          | 7                        |
| Outcome data             | 15* | Report numbers of outcome events or summary measures                                                                                                                                                         | 8-9                      |
| Main results             | 16  | (a) Give unadjusted estimates and, if applicable, confounder-adjusted estimates and their precision (eg, 95% confidence interval). Make clear which confounders were adjusted for and why they were included | Throughout as applicable |
|                          |     | (b) Report category boundaries when continuous variables were categorized                                                                                                                                    | n/a                      |
|                          |     | (c) If relevant, consider translating estimates of relative risk into absolute risk for a meaningful time period                                                                                             | n/a                      |
| Other analyses           | 17  | Report other analyses done—eg analyses of subgroups and interactions, and sensitivity analyses                                                                                                               | 9-10                     |
| <b>Discussion</b>        |     |                                                                                                                                                                                                              |                          |
| Key results              | 18  | Summarise key results with reference to study objectives                                                                                                                                                     | 13                       |
| Limitations              | 19  | Discuss limitations of the study, taking into account sources of potential bias or imprecision. Discuss both direction and magnitude of any potential bias                                                   | 14-15                    |
| Interpretation           | 20  | Give a cautious overall interpretation of results considering objectives, limitations, multiplicity of analyses, results from similar studies, and other relevant evidence                                   | 13-14                    |
| Generalisability         | 21  | Discuss the generalisability (external validity) of the study results                                                                                                                                        | 13-14                    |
| <b>Other information</b> |     |                                                                                                                                                                                                              |                          |
| Funding                  | 22  | Give the source of funding and the role of the funders for the present study and, if applicable, for the original study on which the present article is based                                                | n/a                      |

\*Give information separately for cases and controls in case-control studies and, if applicable, for exposed and unexposed groups in cohort and cross-sectional studies.

**Note:** An Explanation and Elaboration article discusses each checklist item and gives methodological background and published examples of transparent reporting. The STROBE checklist is best used in conjunction with this article (freely available on the Web sites of PLoS Medicine at <http://www.plosmedicine.org/>, Annals of Internal Medicine at <http://www.annals.org/>, and Epidemiology at <http://www.epidem.com/>). Information on the STROBE Initiative is available at [www.strobe-statement.org](http://www.strobe-statement.org).
