# Supplementary material for: ‘It feels like being trapped in an abusive relationship’: bullying prevalence and consequences in the New Zealand senior medical workforce: a cross-sectional study
Source: PubMed Central journal article supplement — BMJ Open. 2018 Mar 19;8(3):e020158. doi: 10.1136/bmjopen-2017-020158 (PMC5875598; doi:10.1136/bmjopen-2017-020158), 2018-03-19
Supplement: bmjopen-2017-020158supp001.pdf [file bmjopen-2017-020158supp001.pdf]

## Appendix 1

| <b>Grouped specialties:</b>             | <b>Specialties included:</b>          | <b>n</b> |
|-----------------------------------------|---------------------------------------|----------|
| Psychiatry                              | Addiction medicine                    | 6        |
|                                         | Psychiatry                            | 162      |
|                                         | Psychogeriatrics                      | 10       |
| Specialist surgery 'other'              | Cardiothoracic surgery                | 5        |
|                                         | Neurosurgery                          | 4        |
|                                         | Oral & Maxillofacial Surgery          | 3        |
|                                         | Paediatric surgery                    | 4        |
|                                         | Plastic & reconstructive surgery      | 13       |
|                                         | Vascular surgery                      | 10       |
|                                         | Urology                               | 5        |
| Other                                   | Clinical Genetics                     | 3        |
|                                         | Medical Administration                | 3        |
|                                         | Other incl. requests for anonymity    | 20       |
|                                         | Rehabilitation Medicine               | 4        |
| Specialist internal medicine 'other'    | Dermatology                           | 6        |
|                                         | Endocrinology                         | 5        |
|                                         | Gastroenterology                      | 12       |
|                                         | Haematology                           | 15       |
|                                         | Immunology                            | 2        |
|                                         | Infectious Diseases Medicine          | 5        |
|                                         | Neurology                             | 12       |
|                                         | Obstetric Medicine                    | 4        |
|                                         | Rheumatology                          | 11       |
| Paediatrics                             | Developmental Paediatrics             | 2        |
|                                         | Neonatology                           | 10       |
|                                         | Paediatric other                      | 15       |
|                                         | Paediatric oncology                   | 6        |
|                                         | Paediatric haematology                | 1        |
|                                         | Paediatric cardiology                 | 3        |
|                                         | Paediatrics                           | 76       |
| General practice                        | General Practice                      | 21       |
|                                         | Family Planning & Reproductive Health | 4        |
|                                         | Accident & Medical Practice           | 2        |
|                                         | Sexual Health Medicine                | 8        |
| Oncology                                | Medical Oncology                      | 18       |
|                                         | Radiation Oncology                    | 10       |
| Occupational and public health medicine | Occupational Medicine                 | 3        |
|                                         | Public Health Medicine                | 15       |
| Anaesthesia                             | Anaesthesia                           | 191      |
|                                         | Pain Medicine                         | 8        |
| Palliative medicine                     | Paediatric palliative care            | 1        |
|                                         | Palliative Medicine                   | 23       |
